# Supplementary material for: Trajectories of chemosensory and cognitive functions up to 1.5 years after acute COVID-19
Source: Research Square preprint supplement (doi:10.21203/rs.3.rs-1239133/v1), 2022-01-12
Supplement: Supplementary file 2 [file bf1daec3cacb725bd5e6913a.xlsx]

## Sheet: initial evaluation_mid 2020
SubjID	Group	Sex	Age (yr.)	Education (yr.)	Regular smoker	Regular drinker	Severity group	COVID-19 severity	Days since discharge	No. underlying cond.	Subj. smell function	Odor threshold	Odor discrim.	Odor id.	Odor valence SD.	Taste id.	Sour int.	Sweet int.	Bitter int.	Salty int.	Umami int.	Sour id.	Sweet id.	Bitter id.	Salty id.	Umami id.	TG lateralization	Visuospatial ability	Alternation	Abstraction	Attention	Language	Memory	Orientation	MoCA	Switch cost	Go/no-go d'	Go/no-go RT	BDI-SF
p001	patient	m	42	12	n	n	nonsevere	mild	14	0	average		6															4	1	1	1	5	8	6	26		4.2561	386.628	1
p002	patient	m	52	9	n	n	nonsevere	moderate	36	0	good	5.5	9	15	1.2433	5	2	4	5	5	5	1	1	1	1	1	5	3	0	2	1	3	8	6	23	21.6	3.2897	455.021	12
p003	patient	f	50	16	n	n	nonsevere	moderate	64	0	average	7.5	10	17	1.5801	5	7	6	7	7	6	1	1	1	1	1	4	4	1	2	1	5	8	6	27	363.922	3.6678	501.597	7
p004	patient	m	39	20	n	n	nonsevere	moderate	60	0	average	10.5	8	17	1.855	5	2	6	6	6	6	1	1	1	1	1	3	4	1	2	1	6	8	6	28	47.6714	3.2897	333.793	6
p005	patient	f	57	12	n	n	nonsevere	moderate	50	0	good	14	7	18	1.5339	5	3	6	7	6	6	1	1	1	1	1	5	4	1	2	1	6	6	6	26	171.437	2.5631	431.829	0
p006	patient	f	43	15	n	n	nonsevere	moderate	54	0	average	4.75	9	17	1.1882	5	3	6	5	5	2	1	1	1	1	1	2	3	1	2	1	4	10	6	27	149.496	2.0729	421.629	4
p007	patient	f	33	12	n	n	nonsevere	moderate	81	0	above average	4	8	16	2.4254	4	7	7	7	7	7	1	1	1	1	0	7	2	0	1	1	3	6	5	18	103.217	3.6678	399.943	0
p008	patient	f	59	10	n	n	severe	severe	74	0	good	3.5	8	17	1.3339	5	4	5	6	4	4	1	1	1	1	1	4	3	1	2	1	3	8	5	23	71.9375	3.2897	373.2	2
p009	patient	f	71	9	n	n	nonsevere	mild	63	1	average	7	6	15	1.5339	5	7	7	4	4	4	1	1	1	1	1	6	4	0	1	1	4	9	6	25	273.695	3.6678	509.101	0
p010	patient	m	44	20	y	n	nonsevere	moderate	29	0	below average	8.5	9	18	0.9963	5	7	5	7	5	5	1	1	1	1	1	5	4	1	2	1	6	7	6	27	-42.6296	4.2561	442.293	1
p011	patient	m	46	13	n	y	severe	severe	65	0	poor	11.25	4	15	0.9701	4	4	7	7	4	4	1	1	1	0	1	6	3	1	0	1	5	9	6	25	40.587	2.2215	352.95	4
p012	patient	f	49	15	n	n	severe	severe	63	0	average	8.25	9	18	1.8752	5	3	6	6	4	4	1	1	1	1	1	7	4	1	2	1	5	8	6	27	38.9468	4.2561	373.571	7
p013	patient	m	58	13	y	n	nonsevere	mild	61	0	good	7.75	3	15	2.2022	4	1	7	1	1	7	1	1	1	1	0	7	3	1	1	1	4	8	6	24	-161.002	4.2561	388.079	19
p014	patient	f	33	12	n	n	nonsevere	mild	61	0	above average	8.5	5	17	1.3198	5	6	7	5	2	2	1	1	1	1	1	5	4	0	1	1	4	7	6	23	-0.2984	3.2897	356.279	12
p015	patient	f	29	9	n	n	severe	critical	58	0	below average	12.5	8	9	1.9926	5	7	7	7	7	7	1	1	1	1	1	3	4	0	2	0	6	9	6	27	291.245	3.2897	363.893	1
p016	patient	f	42	12	n	n	nonsevere	mild	65	0	average	8.75	7	17	1.0922	5	7	7	7	7	3	1	1	1	1	1	8	4	1	1	1	6	6	5	24	-14.3365	4.2561	506.764	6
p017	patient	m	70	12	n	n	nonsevere	moderate	43	2	average	7	6	16	0	4	1	7	7	4	4	0	1	1	1	1	7	4	0	0	1	4	6	5	20		2.3836	374.275	1
p018	patient	m	26	16	y	n	nonsevere	mild	70	0	poor	13	7	11	1.5363	5	6	6	7	4	4	1	1	1	1	1	8	4	1	1	1	5	9	6	27	119.681	4.2561	351.2	8
p019	patient	m	62	14	n	n	severe	severe	95	0	average	6.75	5	15	1.4552	2	4	4	4	4	4	0	1	0	1	0	4	3	1	2	1	5	9	6	27	144.245	3.2897	382.107	3
p020	patient	f	54	11	n	n	nonsevere	moderate	45	2	average	10.5	5	18	1.5049	3	4	4	4	4	4	0	1	1	0	1		2	1	0	1	3	5	6	18	77.6678	3.6678	402.593	13
p021	patient	m	56	12	n	n	nonsevere	moderate	115	0	average	13.5	5	18	0.9852	4	2	4	3	1	2	0	1	1	1	1		4	1	2	1	6	8	6	28	-53.449	2.2215	357.821	5
p022	patient	m	44	15	n	n	nonsevere	mild	100	0	good	16.5	7	16	2.0738	5	4	6	7	5	5	1	1	1	1	1	5	4	1	2	1	6	10	6	30	165.962	2.5631	338.1	1
p023	patient	m	40	16	y	n	severe	severe	56	1	good	7.5	7	17	1.645	5	4	5	6	3	3	1	1	1	1	1	6	4	1	2	1	6	9	6	29	20.5653	3.2897	294.343	2
p024	patient	f	63	15	n	n	severe	severe	106	0	above average	7.5	6	13	0.8498	5	3	5	5	5	5	1	1	1	1	1	4	2	0	2	1	3	9	6	23	13.5044	3.6678	421.228	2
p025	patient	m	67	15	n	n	nonsevere	moderate	110	1	good	10	7	16	0.9701	5	4	4	4	4	4	1	1	1	1	1	4	4	1	2	0	4	7	6	24	855.148	3.2897	428.686	0
p026	patient	f	63	12	n	n	nonsevere	moderate	99	2	average	14.5	6	18	1.7675	5	4	4	7	4	3	1	1	1	1	1	3	2	0	2	1	4	7	6	22	387.907	3.6678	502.914	1
p027	patient	f	39	12	n	n	nonsevere	mild	107	0	good	6.75	9	18	1.259	5	2	3	2	3	2	1	1	1	1	1	5	3	1	2	1	5	9	6	27	136.105	3.6678	357.636	6
p028	patient	m	64	12	n	n	nonsevere	mild	108	1	average	6.25	4	15	1.7489	5	1	7	7	1	7	1	1	1	1	1	5	3	0	0	1	4	9	6	23	179.127	2.766	350.107	6
p029	patient	f	38	12	n	n	severe	critical	24	1	average	0	5	10	1.1448	5	1	6	7	6	7	1	1	1	1	1	6	2	1	2	1	5	9	5	25	30.538	2.766	376.854	18
p030	patient	f	64	12	n	n	nonsevere	mild	98	1	good	9	6	16	1.3827	4	1	7	4	7	7	1	1	1	1	0		4	1	2	0	5	9	6	27		4.2561	535.151	1
p031	patient	m	71	12	n	n	severe	severe	104	1	average	11.75	4	17	0.9701	4	4	4	4	1	4	1	1	1	1	0		4	1	1	1	4	6	6	23	144.678	1.0488	371.611	5
p032	patient	m	55	13	n	n	nonsevere	mild	101	0	good	8.5	5	15	2.0073	4	4	7	7	4	7	0	1	1	1	1	5	3	0	1	1	4	7	6	22	54.0229	3.2897	433.964	0
p033	patient	f	56	15	n	n	severe	severe	88	0	average	10.5	7	15	0.7071	3	7	7	4	7	4	1	1	0	0	1	4	1	0	2	1	5	9	6	24	262.673	1.6832	456.978	7
p034	patient	m	49	12	n	n	nonsevere	moderate	109	0	average	9.5	7	14	1.7226	5	4	7	4	4	4	1	1	1	1	1		4	1	2	1	5	9	6	28	-58.2709	4.2561	584.75	1
p035	patient	f	62	9	n	n	nonsevere	mild	41	0	poor	11.5	8	12	1.5168	5	4	4	4	4	4	1	1	1	1	1	6	3	0	0	1	4	6	4	18	-81.4507	1.8055	350.309	10
p036	patient	m	71	10	n	n	nonsevere	moderate	64	1	below average	7	3	17	0.8575	5	3	5	3	4	3	1	1	1	1	1	4	2	0	1	1	3	5	6	18	591.246	3.2897	464.486	6
p037	patient	f	49	15	n	n	nonsevere	mild	78	1	poor	9.75	7	16	1.4142	5	7	4	4	4	4	1	1	1	1	1	6	3	0	2	1	4	9	6	25	292.071	1.8055	444.317	2
p038	patient	f	59		n	n	severe	severe	62	0	average	14.75	8	16	0.7071	5	4	4	7	4	7	1	1	1	1	1	6	3	1	2	1	4	10	6	27	19.9787	4.2561	373.329	2
p039	patient	f	64	12	n	n	nonsevere	mild	56	0	above average	14.5	5	17	1.2314	5	4	4	7	4	4	1	1	1	1	1	4	2	1	0	1	4	5	6	19	395.541	4.2561	393.521	1
p040	patient	f	63	12	n	n	nonsevere	moderate	56	1	average	4.5	8	16	1.7339	5	4	7	7	4	4	1	1	1	1	1	1	3	0	1	0	4	6	5	19	8.3449	3.6678	383.5	18
p041	patient	m	54	9	n	n	nonsevere	moderate	71	1	average	5.75	5	15	1.4775	5	5	4	6	2	4	1	1	1	1	1	3	4	0	2	1	4	7	6	24	-184.549	3.6678	404.971	6
p042	patient	m	64	12	n	y	nonsevere	moderate	73	0	below average	5.5	6	14	0	5	1	4	7		7	1	1	1	1	1	6	4	1	2	1	4	6	6	24	11.8342	2.2215	392.216	2
p043	patient	m	41	16	n	n	nonsevere	moderate	56	0	below average	2.75	6	16	1.3382	4	1	5	3	1		1	1	1	1	0	6	4	1	1	1	5	10	5	27	191.18	3.2897	476.071	6
p044	patient	f	48	12	n	n	nonsevere	moderate	82	0	average	3.5	6	16	1.5168	4	4	4	4	4	5	1	0	1	1	1	4	2	1	1	1	6	5	6	22	412.26	2.5631	346.626	20
p045	patient	m	50	9	n	y	nonsevere	moderate	110	1	average	8.75	5	14	1.4552	5	4	4	7	4	1	1	1	1	1	1	6	3	1	2	1	5	8	6	26	144.599	3.0022	385.707	5
p046	patient	f	66	12	n	n	nonsevere	mild	51	2	average	8.25	1	17	1.3827	5	1	7	7	1	1	1	1	1	1	1	6	4	0	1	1	2	4	6	18	-33.9183	2.2215	563.402	0
p047	patient	m	41	12	n	n	severe	severe	111	0	average	12.25	7	17	0.5393	5	4	5	5	6	5	1	1	1	1	1	4	3	1	2	1	4	9	6	26	18.6809	2.766	404.357	3
p048	patient	f	54	9	n	n	nonsevere	moderate	69	0	average	10	6	17	1.2274	5	1	7	3	1	1	1	1	1	1	1	4	4	0	1	1	5	5	6	22	341.824	2.3836	345.843	8
p049	patient	f	61	9	n	n	nonsevere	mild	81	0	average	8.25	5	15	2.0292	5	7	4	7	4	4	1	1	1	1	1	2	2	0	0	1	4	4	6	17	56.9886	4.2561	446.979	3
p050	patient	m	46	12	n	n	nonsevere	mild	85	0	average	8.25	6	17	2.1213	5	1	7	7	4	7	1	1	1	1	1	4	4	1	2	1	5	7	6	26	235.865	4.2561	481.194	0
p051	patient	m	59	9	n	n	nonsevere	moderate	94	0	good	10	3	6	1.1504	3	1	7	7		4	0	1	1	1	0	8	2	0	0	1	3	1	5	12	94.7262	1.0488	374.89	0
p052	patient	f	54	12	n	n	severe	severe	65	1	average	9.75	7	17	2.1213	3	7	7	7		1	1	1	1	0	0	7	4	1	2	1	4	6	6	24	70.025	3.2897	434.254	6
p053	patient	f	61	9	n	n	severe	severe	54	0	poor	3	2	14	0.9164	5	2	1	4	1	1	1	1	1	1	1	4	2	1	0	1	2	5	6	17	223.232	2.766	485.809	21
p054	patient	m	69	9	n	n	nonsevere	moderate	53	1	average	5.75	5	14	1.629	2	2	6	4	4	2	0	1	1	0	0	6	4	0	2	1	4	5	6	22	237.797	2.3836	378.614	3
p055	patient	f	56	11	n	n	nonsevere	moderate	28	1	average	6	6	13	2.0926	5	1	7	7	2	4	1	1	1	1	1	6	4	1	1	1	3	7	6	23	68.8809	2.766	365.554	5
p056	patient	m	42	12	n	n	nonsevere	mild	88	0	above average	15.25	5	17	0.9003	4	6	6	5	5	6	1	1	1	0	1	4	3	1	2	1	3	7	6	23	10.8006	4.2561	370.507	0
p057	patient	f	43	15	n	n	severe	severe	91	1	average	6.75	8	15	1.2485	5	1	4	7	2	4	1	1	1	1	1	6	4	1	1	1	5	9	6	27	524.707	1.6832	413.913	5
p058	patient	f	62	12	n	n	nonsevere	moderate	66	0	average	0	3.33	4.5		4	7		7	4	3	1	1	1	1	0	4	2	1	2	1	2	5	6	19	193.695	3.0022	583.796	8
p059	patient	m	16	10	n	n	nonsevere	moderate	91	0	good	8.5	6	14	0.8782	5	4	7	7	6	7	1	1	1	1	1	5	4	1	0	1	6	8	6	26	64.2719	1.8055	351.314	0
p060	patient	f	58	12	n	n	nonsevere	moderate	68	0	poor	3.25	7	8	0.7071	3	1	6	5	4	2	0	1	1	1	0		2	1	1	1	4	6	5	20	245.666	3.2897	388.286	16
p061	patient	m	58	12	y	y	severe	critical	50	2	average	3.75	7	15	0.8264	5	4	5	3	2	4	1	1	1	1	1	1	4	0	2	1	5	5	6	23	117.103	2.766	532.563	4
p062	patient	f	58	10	n	n	nonsevere	mild	80	0	above average	5.5	5	18	1.3827	5	4	7	4	1	4	1	1	1	1	1	5	1	0	1	1	3	8	6	20	35.1192	2.766	414.55	4
p063	patient	f	51	12	n	n	nonsevere	moderate	113	0	below average	0	5	15	1.029	3	4	4	4	4	4	0	1	1	1	0	5	2	0	1	1	2	6	6	18	8.9632	3.0022	431.429	2
p064	patient	f	51	9	n	n	nonsevere	mild	81	0	average	14.5	6	16	1.8471	5	4	7	7	7	1	1	1	1	1	1	5	4	1	0	1	4	7	6	23	164.636	2.766	405.521	6
p065	patient	m	53	10	n	n	nonsevere	moderate	73	0	good	8.75	7	18	1.1882	5	7	4	3	1	3	1	1	1	1	1	3	3	0	1	1	5	5	6	21	274.265	1.9348	388.114	1
p066	patient	f	28	12	n	n	nonsevere	moderate	68	2	above average	6.5	8	17	2.6346	3	4	1	7	7	1	0	1	1	1	0	5	4	0	1	1	4	8	6	24	277.119	3.6678	371.079	5
p067	patient	f	45	9	y	n	nonsevere	mild	55	1	good	12.5	8	18	1.8471	5	7	7	7	4	7	1	1	1	1	1	5	3	1	2	1	4	10	6	27	239.507	3.0022	367.921	4
p068	patient	f	39	12	n	n	nonsevere	moderate	85	0	average	6.5	6	18	1.6764	3	5	6	7	6	2	0	1	1	1	0	7	3	1	2	1	6	9	6	28	-72.7021	3.0022	407.629	1
p069	patient	f	42	15	n	n	nonsevere	moderate	70	0	average	13.25	6	16	0.9583	5	5	5	6	3	7	1	1	1	1	1	5	3	1	2	1	6	9	6	28	-1.0726	3.2897	467.401	10
p070	patient	f	56	11	n	n	severe	severe	88	1	average	10.5	8	16	1.4552	5	1	4	4	1	1	1	1	1	1	1	9	4	1	2	1	4	6	6	24	34.9863	4.2561	400.674	8
p071	patient	m	42	15	n	n	nonsevere	mild	53	1	below average	8.5	7	17	1.8231	4	4	4	4	1	1	0	1	1	1	1	6	4	1	2	1	4	9	6	27	175.404	4.2561	491.693	7
p072	patient	f	66	9	n	n	nonsevere	moderate	60	1	good	11.75	6	15	1.1448	3	4	5	5	4	1	1	1	1	0	0	4	3	0	0	1	3	5	6	18	231.233	2.0729	536.416	0
p073	patient	f	65	13	n	n	nonsevere	moderate	76	0	below average	0	7	16	1.3492	5	4	7	7	5	2	1	1	1	1	1	6	3	1	2	1	6	9	5	27	100.92	4.2561	416.936	2
p074	patient	f	60	12	n	n	nonsevere	mild	95	1	average	7.25	5	15	1.5435	4	6	6	1	7	4	1	1	0	1	1	6	4	0	1	1	4	6	6	22	144.417	2.5631	473.438	3
p075	patient	m	40	19	y	y	nonsevere	mild	106	0	above average	6.25	9	17	0.9218	3	6	7	7	6	6	0	1	1	0	1	5	4	1	2	1	4	7	6	25	250.34	4.2561	364.564	3
p076	patient	f	52	14	n	n	nonsevere	mild	87	0	average	16	8	18	1.5435	5	4	4	4	4	4	1	1	1	1	1	8	3	0	1	1	3	6	6	20	144.261	3.6678	451.45	1
p077	patient	m	48	16	n	n	nonsevere	moderate	34	0	average	12.5	9	17	0.8745	3	3	6	7	5	2	1	1	1	0	0	7	4	1	2	1	6	10	6	30	-33.1783	4.2561	404.979	2
p078	patient	f	50	12	n	n	nonsevere	moderate	100	0	above average	6.5	4	13	1.5038	5	4	7	4	7	4	1	1	1	1	1	2	1	0	1	1	5	6	6	20	414.113	3.2897	418.296	2
p079	patient	f	30	15	n	n	nonsevere	moderate	97	0	average	10	7	15	2.1481	2	5	7	7	3	4	0	1	1	0	0	6	3	1	1	1	5	10	6	27	29.9913	2.5631	284.179	19
p080	patient	f	56	12	n	n	nonsevere	mild	81	1	average	7.5	8	15	1.9403	5	4	4	7		4	1	1	1	1	1	5	2	1	2	1	4	8	6	24	-64.9871	3.6678	547.25	10
p081	patient	m	40	11	y	n	severe	severe	69	0	average	6.5	9	17	1.3672	4	2	4	3	5	3	1	1	1	1	0	4	4	1	2	1	4	7	6	25	-48.8865	4.2561	392.41	2
p082	patient	f	61	12	n	n	nonsevere	moderate	67	0	below average	11.25	8	12	1.4951	4	7	7	7	7	7	0	1	1	1	1	9	4	0	1	1	4	6	6	22	106.277	3.0022	480.17	1
p083	patient	m	61	9	n	y	severe	severe	52	1	average	11	8	9	0	5	1	4	4	1	1	1	1	1	1	1	4	3	1	2	1	3	6	6	22	14.0914	1.9348	430.807	8
p084	patient	m	31	12	y	n	nonsevere	mild	84	0	average	13.25	6	15	1.7235	5	1	7	7	1	7	1	1	1	1	1	6	4	1	2	1	6	9	6	29	191.667	1.567	290.387	0
p085	patient	m	51	16	n	n	nonsevere	moderate	72	0	average	10.5	7	18	1.577	5	3	5	4	4	2	1	1	1	1	1	4	3	1	2	1	5	7	6	25	53.6561	4.2561	554.23	6
p086	patient	f	48	15	n	n	nonsevere	moderate	41	0	average	10.5	4	15	1.4476	5	4	7	5	2	4	1	1	1	1	1	6	3	1	1	1	6	9	6	27	40.2863	3.6678	484.188	4
p087	patient	f	50	9	n	n	nonsevere	moderate	86	1	average	6.75		17	1.914													2	1	1	1	3	8	6	22	261.377			1
p088	patient	f	42	16	n	n	nonsevere	moderate	77	1	average	9	8	17	0.8402	4	5	6	5	6	1	0	1	1	1	1	6	3	0	2	1	5	8	6	25	171.941	4.2561	489.171	9
p089	patient	f	50	12	n	n	nonsevere	moderate	77	1	average	10.25	5	18	2.2557	5	4	7	7	4	7	1	1	1	1	1	4	3	1	2	1	5	9	6	27	-153.58	3.0022	403.336	17
p090	patient	m	51	15	y	y	severe	severe	67	0	average	5.25	6	17	0.7071	4	3	3	6	3	7	1	0	1	1	1	4	4	1	2	1	5	9	6	28	26.6402	3.6678	348.6	16
p091	patient	f	48	12	n	n	severe	critical	96	0	average	4.25	7	17	1.8231	5	4	7	1	4	4	1	1	1	1	1	4	4	1	2	1	5	9	6	28	75.1588	3.0022	349.079	16
p092	patient	f	47	16	n	n	nonsevere	mild	84	0	above average	8.75	6	16	1.7536	5	1	7	7	5	4	1	1	1	1	1	6	4	1	1	1	5	9	6	27	21.5479	4.2561	342.721	0
p093	patient	f	30	16	n	n	nonsevere	mild	88	0	average	14.25	10	16	2.0292	5	2	5	6	5	4	1	1	1	1	1	8	4	1	2	1	6	9	6	29	-51.2301	3.0022	338.636	0
p094	patient	f	49	15	n	n	nonsevere	moderate	99	0	average	10.5	7	16	1.8231	5	4	4	7	4	7	1	1	1	1	1	4	4	1	2	1	4	7	6	25	20.1586	1.8055	386.022	5
p095	patient	m	50	20	n	n	severe	severe	88	0	good	5.25	7	15	1.5168	5	6	7	7	7	3	1	1	1	1	1	7	4	1	2	1	4	9	6	27	86.6809	4.2561	420.114	0
p096	patient	f	25	16	n	n	nonsevere	moderate	100	0	average	10	7	17	1.7564	5	3	6	7	4	5	1	1	1	1	1	6	4	1	1	1	5	9	6	27	19.4925	1.8055	309.525	5
p097	patient	f	30	15	n	n	nonsevere	mild	80	0	above average	10.25	7	18	2.4254	5	7	7	7	7	7	1	1	1	1	1	10	4	1	1	1	5	10	6	28	278.342	2.3836	352.072	3
p098	patient	f	53	10	n	n	nonsevere	moderate	95	0	average	16.25	7	17	2.2752	5	4	7	7	7	4	1	1	1	1	1	6	4	0	2	1	5	10	6	28	-72.0918	4.2561	375.021	1
p099	patient	m	57	26	n	n	severe	severe	99	0	average	5.75	6	17	1.1785	5	6	6	5	6	4	1	1	1	1	1	5	3	1	2	1	5	8	6	26	238.613	3.2897	469.143	1
p100	patient	m	53	16	y	n	severe	severe	85	0	average	11	7	17	1.9571	5	3	6	7	5	4	1	1	1	1	1	3	4	1	2	1	6	10	6	30	91.531	3.6678	451.721	1
p101	patient	f	36	17	n	n	nonsevere	mild	101	0	good	15.5	9	18	0.6077	5	2	4	6	4	2	1	1	1	1	1	4	4	1	2	1	5	9	6	28	89.4681	3.0022	362.45	2
p102	patient	f	45	15	n	n	nonsevere	moderate	108	0	average	13.25	8	17	1.815	4	4	5	2	2	4	1	1	1	0	1	7	2	1	1	1	4	10	6	25	692.35	3.0022	412.907	3
p103	patient	f	58	14	n	n	nonsevere	moderate	76	0	average	2.5	4	16	1.5	4	4	4	4	4	1	0	1	1	1	1		4	0	0	1	4	5	6	20		1.8055	467.703	10
p104	patient	m	36	16	n	n	nonsevere	moderate	86	0	poor	11	7	15	1.0247	5	4	5	6	3	4	1	1	1	1	1	6	4	1	2	1	6	9	6	29	45.8921	2.3836	415.707	3
p105	patient	f	63	9	n	n	severe	critical	27	0	above average	6.75	5	11	1.645	5	4	4	4	7	4	1	1	1	1	1	4	3	0	0	1	2	5	6	17	-395.917	3.2897	464.783	23
p106	patient	m	64	9	n	n	nonsevere	mild	83	0	below average	20	9	15	1.5	5	2	2	7	2	4	1	1	1	1	1	4	3	1	2	1	4	9	6	26		3.2897	581.825	1
p107	patient	m	49	15	n	n	nonsevere	moderate	59	0	poor	11	3	16	1.8856	4	3	7	4	2	2	1	1	1	1	0	1	3	1	1	1	5	5	5	21	763.076	3.2897	432.367	3
p108	patient	m	51	15	n	y	nonsevere	mild	83	0	average	11	8	17	1.5049	4	1	7	7	4	4	1	1	1	1	0	5	3	1	2	1	4	10	6	27	242.733	4.2561	460.179	1
p109	patient	m	51	12	n	n	nonsevere	moderate	82	0	poor	10.75	4	12	1.25	5	7	7	3	5	6	1	1	1	1	1	5	4	1	0	1	6	7	6	25	3.875	4.2561	489.007	8
p110	patient	f	65	12	n	n	nonsevere	moderate	66	1	poor	2.5	6	7	1.1213	3	4	7	4	4	1	1	0	1	1	0	5	3	1	2	1	6	9	6	28	11.9378	3.2897	498.187	5
p111	patient	f	40	16	n	n	nonsevere	mild	52	0	below average	4.5	10	18	1.1827	3	5	6	6	7	5	1	1	1	0	0	1	4	1	1	1	6	8	6	27	117.253	3.0022	293.407	6
p112	patient	f	61	13	n	n	nonsevere	moderate	107	1	average	10.75	9	17	1.1882																								2
p113	patient	f	54	8	n	n	severe	severe	52	0	poor	0	3.33	4.5		4	2	5	5	2	1	1	1	1	0	1		3	1	2	1	6	7	6	26	32.769	1.567	402.679	3
p114	patient	m	52	15	y	y	nonsevere	mild	75	1	average	6.25	5	15	1.2834	5	4	7	7	7		1	1	1	1	1	6	3	1	1	1	3	7	6	22	20.2644	3.2897	335.657	4
p115	patient	f	59	12	n	n	nonsevere	mild	78	0	above average	7.5	7	7	1.1448	5	7	7	7	5	6	1	1	1	1	1	6	4	1	0	1	4	9	6	25	39.4445	4.2561	391.636	1
p116	patient	f	51	9	n	n	nonsevere	mild	85	0	below average	11.75	2	17	1.883	3	4	7	7	3	4	0	1	1	1	0	6	3	1	2	1	5	7	6	25	-154.053	3.2897	431.629	2
p117	patient	f	37	16	n	n	nonsevere	mild	76	1	poor	5.25	9	14	1.8114	5	3	7	7	4	7	1	1	1	1	1	7	4	1	2	1	6	9	6	29	29.5874	3.6678	330.734	2
p118	patient	f	64	12	n	n	nonsevere	moderate	45	1	below average	2.5	4	12	1.2834	5	1	4	1	4		1	1	1	1	1	3	4	1	1	1	0	6	5	18	772.949	2.0729	462.812	11
p119	patient	f	64	14	n	n	nonsevere	mild	85	0	good	4.25	5	15	1.7823	5	4	4	7	5	3	1	1	1	1	1	6	4	1	0	1	4	7	6	23	141.69	1.4558	357.014	2
p120	patient	m	63	15	n	n	nonsevere	mild	86	0	average	14	8	12	1.5339	5	1	4	4	4	1	1	1	1	1	1	7	4	1	2	1	4	9	6	27	148.041	3.2897	452.777	0
p121	patient	f	63	12	n	n	nonsevere	moderate	105	3	average	8	5	14	1.0432	5	4	4	5	5	5	1	1	1	1	1	4	3	0	0	1	4	9	6	23	86.7481	3.2897	618.261	1
p122	patient	f	66	14	n	n	nonsevere	mild	56	1	average	13	7	16	1.4246	5	4	6	6	4	5	1	1	1	1	1	6	4	0	0	1	4	10	6	25	257.087	3.0022	380.814	4
p123	patient	m	50	15	n	n	severe	severe	38	1	good	13	7	15	1.5435	4	1	4	1	4	4	0	1	1	1	1	7	4	1	1	1	4	10	6	27	297.202	3.0022	409.2	2
p124	patient	m	57	12	n	n	nonsevere	mild	89	0	average	6.25	5	16	1.5339	5	4	7	7	4	7	1	1	1	1	1	5	4	1	1	1	4	8	6	25	-34.6098	4.2561	420.071	2
p125	patient	m	67	15	n	n	severe	severe	95	0	average	7	8	17	2.1144	4	5	4	4	3	4	1	1	1	0	1	5	3	1	2	1	5	6	5	23	35.2	3.2897	388.25	2
p126	patient	f	66	12	n	n	nonsevere	mild	85	0	poor	6.5		14	1.7424	5	4	7	4	5	4	1	1	1	1	1	5	3	1	2	1	3	6	6	22	-144.944	3.6678	482.993	2
p127	patient	f	57	14	y	y	nonsevere	moderate	92	0	good	9	5	18	0.8165	5	4	5	7	4	5	1	1	1	1	1	7	4	0	2	1	6	10	6	29	-9.2023	3.6678	329.4	2
p128	patient	f	52	12	n	n	nonsevere	mild	41	1	below average	6.75	7	16	1.4552	5	4	4	6	4	5	1	1	1	1	1	6	4	0	0	1	3	10	6	24	-41.3825	2.0729	483.831	2
p129	patient	m	35	12	n	y	nonsevere	mild	77	0	average	5.75	10	18	2.0934	4	4	7	7	4	1	1	1	1	1	0	5	4	1	2	1	6	10	6	30	0.3743	2.5631	306.279	4
p130	patient	f	60	11	n	n	nonsevere	moderate	88	0	average	10.5	8	17	1.166	5	4		1	1	6	1	1	1	1	1	2	2	1	2	0	4	4	6	19	615.5	1.9348	352.479	5
p131	patient	f	55	12	n	n	nonsevere	mild	78	0	average	9.75	6	18	1.855	5	4	7	7	7	4	1	1	1	1	1	4	3	0	0	0	3	6	5	17	219.492	3.2897	480.343	1
p132	patient	m	31	16	n	n	severe	severe	65	0	average	6.25	8	16	1.5038	5	2	5	6	4	5	1	1	1	1	1	8	4	1	2	1	4	7	6	25	88.6549	2.5631	307.721	3
p133	patient	f	48	12	n	n	nonsevere	mild	77	0	average	4.5	7	17	1.9869	5	6	7	7	6	7	1	1	1	1	1	5	3	1	1	1	6	10	6	28	26.192	2.766	508.214	3
p134	patient	f	66	27	n	n	severe	severe	71	0	below average	3.75	3	9	1.5624	4	4			4		0	1	1	1	1	5	4	1	2	1	4	9	6	27	-159.619	2.5631	376.829	4
p135	patient	f	67	12	n	n	severe	severe	76	1	poor	6				3	2	2	5	4	2	1	1	1	0	0		2	0	1	1	4	6	4	18	739.205	3.0022	503.252	3
p136	patient	m	35	16	n	n	nonsevere	mild	96	0	above average	5.75	9	18	1.4653	4	1	4	6	4	4	1	1	1	1	0	2	4	1	2	1	5	10	6	29	250.696	3.0022	434.686	2
p137	patient	f	68	9	n	n	nonsevere	mild	92	1	average	5.75	7	18	1.11	3	1	6	1	2	3	0	1	0	1	1	3	4	1	2	1	6	10	6	30	708.429	1.9348	528.582	3
p138	patient	m	57	12	n	y	severe	severe	58	0	good	6.75	5	16	1.9943	3	2	3	7	2	7	0	0	1	1	1	6	3	1	1	0	5	8	6	24	50.6085	4.2561	459.252	1
p139	patient	f	54	6	n	n	nonsevere	mild	58	0	poor	0	3.33	4.5		5	1	4	1	1	1	1	1	1	1	1	4	3	0	0	1	4	8	5	21	77.1532	2.5631	398.77	16
p140	patient	m	36	12	y	n	nonsevere	moderate	87	0	average	8.5	10	18	1.1147	5	4	7		3	6	1	1	1	1	1	8	4	1	2	1	5	9	6	28	56.9135	3.6678	532.579	1
p141	patient	m	55	11	n	y	nonsevere	mild	89	2	below average	10.5	8	18	1.5435	2	4	4	4	4		0	1	0	1	0	3	3	1	2	1	5	9	6	27	-143.169	3.2897	400.144	0
p142	patient	m	69	12	n	y	nonsevere	mild	56	1	average	2	7	17	1.4234	4	4	5	4	4	4	0	1	1	1	1	2	3	1	1	1	5	7	6	24	529.957	1.9348	407.862	0
p143	patient	f	68	15	n	n	nonsevere	moderate	56	3	average	10	3	15	2.3736																								2
p144	patient	m	53	13	y	y	nonsevere	moderate	73	2	average	13.5	6	16	1.1144	4	5	6	3	3	5	0	1	1	1	1	6	4	1	1	1	5	9	6	27	-94.4375	4.2561	543.614	2
p145	patient	m	67	9	n	n	nonsevere	moderate	105	4	above average	10.5	9	18	0.7071	3	1	7	7	1	7	0	1	1	1	0	5	3	0	1	1	3	9	6	23	232.812	4.2561	421.321	0
p146	patient	f	66	12	n	n	nonsevere	moderate	103	1	good	10.5	7	18	1.3827	5	1	4	4	1	1	1	1	1	1	1	7	4	1	1	1	5	8	6	26	-23.8744	2.766	400.309	0
p147	patient	m	47	15	n	n	nonsevere	moderate	92	1	above average	5.25	8	18	1.0369	5	3	7	7	4	3	1	1	1	1	1	5	4	1	1	1	3	7	6	23	722.889	3.2897	399.536	2
p148	patient	m	64	12	n	n	nonsevere	moderate	74	0	average	5.25	8	18	1.6618	5	2	5	1	2	3	1	1	1	1	1	6	4	1	2	1	4	10	6	28	-51.6458	4.2561	530.793	2
p149	patient	m	68	9	n	n	severe	severe	93	1	average	10.5	6	17	0.7071	3	7	7	4	4	1	1	1	1	0	0	6	3	1	2	1	5	4	6	22	162.511	3.0022	500.065	2
p150	patient	f	52	12	n	n	severe	critical	65	0	average	5.25	4	13	1.9174	5			5			1	1	1	1	1	5	4	1	1	1	4	7	6	24	-73.0532	2.5631	388.057	4
p151	patient	f	50	12	n	n	nonsevere	mild	73	0	average	8	7	17	1.6179	5	4	7	7	5	4	1	1	1	1	1	4	3	0	2	1	3	7	6	22	78.0787			2
p152	patient	m	56	8	n	n	nonsevere	mild	53	0	poor	8.5	5	10	2.5495	4	1	7		1	4	1	1	0	1	1	3	3	1	0	1	2	5	6	18	80.6335	3.6678	456.504	3
p153	patient	f	62	12	n	n	severe	severe	74	0	average	0	3	7	2.1182	3	4	4	7	4	4	1	1	1	0	0	5	4	1	1	0	2	2	6	16	225.649	1.6832	445.192	27
p154	patient	f	62	14	n	n	nonsevere	moderate	118	0	good	7.5	7	14	1.4552	5	4	4	7	4	4	1	1	1	1	1	7	4	0	1	1	4	8	6	24	74.7089	1.6832	326.353	3
p155	patient	m	36	16	n	n	severe	severe	100	0	average	6.25	4	17	1.1144	5	2	7	7	6	5	1	1	1	1	1	4	3	1	2	1	4	9	6	26	90.5389	4.2561	377.714	6
p156	patient	f	36	12	n	n	nonsevere	moderate	126	0	above average	10	8	16	1.7573	5	4	5	7	4	5	1	1	1	1	1	3	4	1	1	1	5	9	6	27	95.2384	3.2897	327.345	1
p157	patient	f	35	15	n	n	nonsevere	mild	70	0	poor	8.5	6	18	0.9835	4	3	5	7	4	3	1	1	1	1	0	8	4	1	2	1	6	7	6	27	-45.1111	4.2561	412.662	4
p158	patient	f	37	19	n	n	nonsevere	mild	100	0	good	8.75	7	17	1.8471	4	1	6	7	4	2	1	1	1	1	0	4	4	1	2	1	6	9	6	29	271.882	4.2561	485.357	4
p159	patient	f	57	12	n	n	nonsevere	mild	61	1	average	4.25	5	17	1.3827	4	1	7	1	4	1	1	1	0	1	1	4	4	0	1	1	3	4	6	19	-10.4255	1.9348	371.7	2
p160	patient	f	29	22	n	n	nonsevere	mild	50	0	poor	8.75	8	16	2.2959												6									167.927	4.2561	329.329	3
p161	patient	f	39	16	n	n	nonsevere	moderate	113	0	average	7.5	6	17	1.0432	5	3	5	4	4	3	1	1	1	1	1	8	4	1	2	1	5	10	6	29	-107.067	4.2561	352.971	0
p162	patient	f	42	15	n	n	nonsevere	mild	99	0	average	7.75	7	18	1.4552	5	1	4	4	1	1	1	1	1	1	1	7	4	1	1	1	5	6	6	24	7.5333	2.5631	392.836	6
p163	patient	f	42	15	n	n	nonsevere	mild	99	0	average	5.75	8	18	1.8471	5	1	7	4	4	4	1	1	1	1	1	6	3	1	1	1	6	9	6	27	16.7165	4.2561	455.743	0
p164	patient	f	59	12	n	n	nonsevere	moderate	58	0	average	13.75	9	17	1.2834	3	5	6	7	7	2	0	1	1	1	0	4	3	1	1	1	5	7	6	24	203.666	3.6678	374.021	12
p165	patient	m	45	15	n	n	nonsevere	mild	92	0	poor	8	6	18	0.9835	5	3	6	2	5	4	1	1	1	1	1	5	4	1	1	1	4	9	6	26		4.2561	382.75	3
p166	patient	f	63	12	n	n	nonsevere	mild	78	1	poor	6.25	6	18	1.1144	5	4	5	7	4	4	1	1	1	1	1	5	2	0	1	1	3	8	6	21	30.3548	2.766	407.836	24
p167	patient	f	45	12	n	n	nonsevere	moderate	64	0	above average	6.25	9	14	1.9967	5	4	7	7	2	3	1	1	1	1	1	9	3	1	1	1	4	6	6	22	-34.6776	4.2561	405.993	6
p168	patient	f	65	14	n	n	nonsevere	moderate	62	1	above average	13	8	16	2.401	5	5	4	2	4	3	1	1	1	1	1	9	4	1	1	1	5	10	6	28	171.54	4.2561	407.886	3
p169	patient	m	32	9	n	n	nonsevere	mild	95	1	poor	7.75	5	15	1.914	5	2	4	7	3	4	1	1	1	1	1	6	1	1	1	1	4	5	5	18	-315.023	3.6678	436.771	18
p170	patient	m	54	9	n	n	nonsevere	moderate	67	1	below average	3.75	5	13	0	3	7	7	4	4	7	1	1	1	0	0	5	4	0	0	1	3	5	6	19	97.3026	3.2897	473.935	8
p171	patient	f	68	12	n	n	nonsevere	moderate	73	3	poor	4.5	6	17	1.7573	5	4	7	6	5	4	1	1	1	1	1		2	0	0	1	3	6	6	18	534.037	2.0729	464.304	18
p172	patient	m	70	15	n	n	nonsevere	moderate	17	0	average	8.75	8	18	1.0847	5	5	7	7	7	7	1	1	1	1	1	7	4	1	1	1	5	8	6	26	179.116	4.2561	511.479	3
p173	patient	f	66	8	n	n	nonsevere	mild	68	1	average	0	9	18	1.6088	5	4	4	7	7	1	1	1	1	1	1	7	4	0	1	1	4	7	6	23	-113.992	3.2897	379.891	2
p174	patient	f	57	5	n	n	nonsevere	mild	68	0	average	10	6	14	0.9701	4	1	4	4	1	7	0	1	1	1	1	5	3	0	1	0	3	9	6	22	43.5727	3.6678	384.77	22
p175	patient	f	34	16	n	n	nonsevere	moderate	94	0	average	9.5	7	17	1.9268	5	5	6	3	4	5	1	1	1	1	1	6	4	1	2	1	6	9	6	29	293.984	3.0022	369.064	19
p176	patient	m	26	14	n	n	nonsevere	moderate	98	0	above average	4.5	8	17	2.1761	5	4	7	7	4	7	1	1	1	1	1	6	2	0	1	1	6	7	6	23	51.2417	2.766	344.62	3
p177	patient	f	62	7	n	n	nonsevere	mild	78	0	average	7	7	16	1.645	4	1	4	1	4	1	1	1	1	1	0	8	3	1	1	1	4	6	6	22	56.5465	3.6678	399.143	2
p178	patient	f	62	12	n	n	nonsevere	mild	70	0	average	4.75	3	16	1.4096	3	3	4	7	4	1	0	1	1	0	1	5	3	0	1	1	3	6	6	20		1.8055	385.221	1
p179	patient	f	70	9	n	n	nonsevere	moderate	60	5	average	8.5	6	16	1.4951																								1
p180	patient	f	34	9	n	n	nonsevere	mild	15	0	average	6.5	8	16	1.7823	3	1	7	7	7	1	0	1	1	1	0	5	3	0	1	0	4	9	6	23	139.624	3.2897	461.899	0
p181	patient	m	57	12	n	n	nonsevere	moderate	71	0	average	11.5	9	14	0.3835												5	3	1	2	1	5	9	6	27	81.4384	3.2897	362.457	18
p182	patient	f	43	15	n	n	nonsevere	moderate	39	0	average	5.25	6	18	1.9174	4	1	7	1	4	4	0	1	1	1	1		4	1	1	0	6	7	6	25	8.6818	2.3836	336.942	19
p183	patient	f	66	12	n	n	severe	severe	63	0	poor	0	8	11	2.4071	2	1	4	7	4	1	0	1	1	0	0	5	4	0	2	1	5	7	6	25	149.627	3.2897	413.014	17
p184	patient	m	39	18	n	n	nonsevere	mild	17	0	average	10.5	6	18	1.1827	5	3	4	4	3	5	1	1	1	1	1	5	4	1	2	1	6	10	6	30	72.6482	3.2897	347.071	9
p185	patient	f	48	16	n	n	nonsevere	moderate	44	0	average	7	6	17	0.686	5	1	6	6	4	6	1	1	1	1	1	3	4	1	2	1	5	7	6	26	230.564	2.3836	371.114	1
p186	patient	f	50	15	n	n	nonsevere	moderate	124	0	average	8	5	16	1.4096	5	4	7	7	4	2	1	1	1	1	1	2	4	1	2	1	5	8	6	27	162.396	3.0022	423.914	1
p187	patient	f	47	9	n	n	nonsevere	moderate	94	0	good	7.5	7	17	2.4071	5	1	7	7	7	7	1	1	1	1	1	8	3	1	2	1	4	10	6	27	81.2293	3.0022	428.75	4
p188	patient	f	47	9	n	n	nonsevere	mild	77	0	below average	6.5	8	16	2.2637	5	5	7	7	5	4	1	1	1	1	1	5	3	1	1	1	4	9	6	25	347.154	1.567	380.547	12
p189	patient	f	55	9	n	n	nonsevere	mild	79	0	average	4.25	4	16	1.5339	5	1	4	7	4	1	1	1	1	1	1	3	2	0	1	1	2	5	6	17	-33.0909	4.2561	471.874	8
p190	patient	m	30	15	n	n	nonsevere	mild	107	0	average	14.5	5	15	1.7868	5	3	7	7	5	7	1	1	1	1	1	7	3	1	1	1	5	5	5	21	416.089	1.9348	355.482	0
p191	patient	f	43	12	n	y	nonsevere	mild	77	0	average	0	1	10	1.1618	4	3	5	7	6	2	0	1	1	1	1	7	3	1	2	1	5	8	6	26	-148.454	3.0022	458.914	5
p192	patient	f	48	12	n	n	nonsevere	mild	101	1	below average	6.5	4	16	1.7823	5	4	4	7	7	4	1	1	1	1	1	6	3	0	1	1	4	5	6	20	208.927	3.0022	394.187	2
p193	patient	m	56	8	y	n	nonsevere	moderate	78	0	above average	17.5	3	12	1.5858	5	4	7	4	4	4	1	1	1	1	1	5	1	1	2	1	6	10	6	27	88.8181	3.2897	399.507	4
p194	patient	f	64	12	n	n	nonsevere	mild	77	1	average	20	8	17	1.4552	5	1	5	7	7	1	1	1	1	1	1	4	4	1	2	1	5	10	6	29	18.519	3.6678	393.857	1
p195	patient	m	35	16	n	n	nonsevere	moderate	113	0	average	5.5	7	18	1.1618	5	2	4	7	3	5	1	1	1	1	1	4	4	0	2	0	6	9	6	27	234.119	3.6678	518.421	9
p196	patient	f	59	9	n	n	severe	critical	83	1	average	3.25	6	17	1.5049	5	4	7	7	7	4	1	1	1	1	1	7	4	0	1	1	3	6	6	21	157.429	4.2561	477.029	16
p197	patient	m	62	12	n	n	nonsevere	mild	83	0	average	12.25	6	13	1.3827	5	2	2	4	1	3	1	1	1	1	1	4	3	1	0	1	5	6	6	22	-47.2944	0.95408	322.593	0
p198	patient	m	48	10	n	n	nonsevere	moderate	91	0	average	6.25	10	15	1.5435	5	4	7	7	1	1	1	1	1	1	1	4	3	1	2	0	4	8	6	24	117.348	3.0022	488.594	7
p199	patient	f	42	9	n	n	nonsevere	moderate	95	0	poor	0	3.33	4.5		5	1	4	7	1	7	1	1	1	1	1	0	4	1	0	1	5	5	6	22	95.2116	2.766	387.871	1
p200	patient	f	58	12	n	n	nonsevere	moderate	95	0	average	3.25	3	17	2.1144	3	4	6	1	5	1	1	1	0	1	0	7	4	0	1	1	4	6	6	22	64.7074			1
p201	patient	f	50	9	n	n	nonsevere	mild	72	0	below average	8.5	5	17	1.5339	5	4	7	7	4	7	1	1	1	1	1	3	4	1	2	1	4	8	6	26	64.9892	2.0729	374.686	6
p202	patient	m	54	11	y	n	nonsevere	moderate	33	0	average	3.75	5	17	2.1144	4	1	7	4	4	4	1	1	1	0	1	5	4	1	2	1	6	6	6	26		3.0022	334.721	6
p203	patient	f	62	12	n	n	nonsevere	moderate	104	0	average	5.75	5	17	1.9403	5	4	4	4	4	4	1	1	1	1	1	4	4	0	1	1	4	5	6	21	64.2325	3.2897	475.429	11
p204	patient	f	56	12	n	n	nonsevere	moderate	90	0	average	10.25	3	18	1.0556	3	2	4	5	4	2	1	1	1	0	0	8	3	0	1	1	4	4	6	19				2
p205	patient	f	56	8	n	n	severe	severe	96	0	average	9	1	17	1.5435	5	1	4	4	1	4	1	1	1	1	1	6	3	1	1	1	3	8	6	23	174.685	3.6678	406.629	6
p206	patient	f	53	12	n	n	nonsevere	moderate	42	0	below average	5.75	5	18	0.7071	5	1	7	7	4	4	1	1	1	1	1	5	4	1	1	1	5	7	6	25	10.5025	3.6678	345.686	4
p207	patient	f	56	13	n	n	severe	severe	77	0	average	4.5	6	18	2.1213	5	4	7	7	4	7	1	1	1	1	1	3	3	1	2	1	4	8	6	25	206.997	2.5631	430.586	3
p208	patient	m	42	16	n	y	nonsevere	mild	126	0	average	16.75	8	17	1.5435	5	1	7	6	7	4	1	1	1	1	1	5	4	1	2	1	5	9	6	28	313.39	1.4558	337.129	1
p209	patient	f	59	12	n	n	severe	severe	70	1	poor	4.75	5	16	2.4314	5	1	7	7	7	4	1	1	1	1	1	4	2	1	0	1	5	6	6	21	174.881	2.3836	446.35	16
p210	patient	f	60	12	n	n	severe	severe	90	0	average	5.25	7	18	1.3956	5	5	7	3	4	5	1	1	1	1	1	5	4	0	0	1	4	5	6	20	12.8239	4.2561	439.629	12
p211	patient	m	43	12	y	n	nonsevere	moderate	100	0	average	5.5	8	17	1.4653	5	5	6	7	5	4	1	1	1	1	1	6	4	1	2	1	4	7	6	25	327.863	3.6678	407.9	2
p212	patient	m	27	16	n	n	nonsevere	moderate	100	0	above average	7.75	6	17	1.1318	5	1	5	6	4	4	1	1	1	1	1	5	4	1	2	1	6	6	6	26	88.4222	3.0022	331.321	6
p213	patient	m	38	15	y	y	nonsevere	mild	82	0	average	13.5	3	17	1.4473	5	4	3	5	3	3	1	1	1	1	1	4	2	1	2	1	4	7	6	23	-17.8304	4.2561	387.421	9
p214	patient	m	58	16	n	y	nonsevere	mild	91	0	below average	2	7	18	0	4		7	7	6	1	0	1	1	1	1	4	4	1	2	1	5	9	6	28	190.223	4.2561	470.193	0
p215	patient	f	48	12	n	n	severe	severe	105	1	average	11.25	5	14	0.7859	3	4	5	6	1	1	1	1	1	0	0	5	3	1	2	0	5	8	6	25	-163.273	3.6678	381.564	1
p216	patient	m	66	15	n	n	severe	severe	123	1	above average	10.75	5	17	0.9852	5	4	6	5	4	5	1	1	1	1	1	7	4	1	0	1	6	10	6	28	5.0647	4.2561	422.864	9
p217	patient	m	57	15	n	y	nonsevere	moderate	79	0	average	16.25	9	17	1.8865	5	4	5	7	3	4	1	1	1	1	1	3	4	1	2	1	6	9	6	29	182.723	3.0022	368.357	1
p218	patient	f	59	15	n	n	nonsevere	moderate	122	0	good	7.75	6	17	0.5145	4	1	6	6	4	4	0	1	1	1	1	4	3	1	1	1	3	7	6	22	-3.8779	4.2561	478.064	4
p219	patient	f	50	16	n	n	severe	severe	79	0	below average	10.25	5	5	0	2	3	5	5	3	4	0	1	1	0	0	6	4	1	2	1	3	9	6	26	252.589	3.6678	415.593	6
p220	patient	f	56	12	n	n	nonsevere	mild	108	1	good	14.25	3	16	1.3346	3	1	4	4	4	1	1	1	1	0	0	4	2	1	2	1	6	9	6	27	54.3852	2.3836	385.022	0
p221	patient	f	57	12	n	n	nonsevere	moderate	81	0	below average	2.75		17	1.3815													4	0	0	1	4	7	6	22				7
p222	patient	f	50	4	n	n	nonsevere	moderate	96	0	average	9.75	2	13	0	3	1	7	5	4	5	0	1	0	1	1	5	2	0	1	1	3	5	5	17	172.587	3.0022	509.565	2
p223	patient	f	31	15	n	n	nonsevere	mild	106	0	good	14	6	18	1.3827	5	4	6	7	5	6	1	1	1	1	1	6	4	1	1	1	4	9	6	26	310.955	4.2561	399.321	5
p224	patient	f	60	12	n	n	severe	severe	83	2	above average	14	8	18	2.0616	4	7	7	7	7	2	1	1	1	1	0	7	4	0	0	1	4	8	6	23				13
p225	patient	f	39	12	n	y	nonsevere	mild	97	0	poor	9	7	18	2.1213	4	4	7	7	7	4	0	1	1	1	1	4	4	1	1	1	5	7	6	25	76.9368	3.6678	414.686	5
p226	patient	m	33	15	n	n	nonsevere	moderate	59	0	below average	8.75	7	18	1.9166	5	6	7	7	4	3	1	1	1	1	1	5	4	1	2	1	4	8	6	26	86.3666	2.766	322.829	5
p227	patient	m	40	19	y	n	nonsevere	moderate	71	0	average	12	6	16	2.3009	5	1	4	7	4	7	1	1	1	1	1	7	4	1	2	1	5	10	6	29	23.286	4.2561	420.174	2
p228	patient	f	57	15	n	n	nonsevere	moderate	87	0	average	9.5	1	17	0.4714	4	4	7	3	5	5	0	1	1	1	1	4	3	0	0	1	3	7	6	20	172.146	3.0022	342.843	2
p229	patient	m	32	15	n	n	nonsevere	moderate	104	0	average	11.25	7	16	1.5718	3	5	6	4	5	6	1	1	1	0	0	7	4	1	1	1	4	10	6	27	107.721	3.2897	357.839	1
p230	patient	m	68	16	n	n	nonsevere	moderate	84	0	average	20	2	16	0.5483	4	1	6	7	7	1	1	1	1	1	0		4	1	2	1	5	5	6	24		3.0022	475.647	6
p231	patient	f	38	12	n	n	nonsevere	mild	87	0	good	11.25	6	17	2.1144	5	7	4	4	1	7	1	1	1	1	1	6	4	1	2	1	6	9	6	29	20.507	3.2897	358.621	0
p232	patient	f	38	12	n	n	severe	severe	82	0	average	8	9	18	1.7235	4	4	4	7	7	4	1	1	1	1	0	1	4	1	2	1	5	8	6	27	199.909	3.6678	373.821	9
p233	patient	f	34	12	n	n	nonsevere	moderate	89	0	average	6	5	17	1.5435	5	7	7	7	4	7	1	1	1	1	1	5	4	1	1	1	4	4	6	21	-36.8444	3.2897	356.043	1
p234	patient	f	58	12	n	n	nonsevere	mild	93	1	above average	9	9	18	1.029	4	2	4	4	4	1	1	1	1	1	0	7	3	0	2	1	5	8	6	25	11.4653	2.766	411.985	1
p235	patient	f	52	11	n	n	nonsevere	moderate	83	0	poor	2.5	5	18	0.9852	5	4	6	3	4	4	1	1	1	1	1	6	4	1	0	1	5	7	6	24	20.3352	3.6678	497.435	2
p236	patient	f	64	9	n	n	nonsevere	moderate	88	2	average	3.5	6	16	1.8231	5	4	7	7	4	4	1	1	1	1	1	6	2	0	1	1	2	8	6	20	32.18	3.2897	457.671	1
p237	patient	f	41	16	n	n	nonsevere	mild	100	0	good	7	7	17	1.3382	5	4	6	6	4	4	1	1	1	1	1	7	4	1	2	1	6	8	6	28	-88.6947	3.6678	324.307	1
p238	patient	f	70	15	n	n	nonsevere	moderate	88	0	average	8	3	9	2.8128	4	4	4	4	4	4	1	1	1	1	0	4	3	0	1	1	4	3	6	18	568.797	3.2897	436.834	13
p239	patient	m	71	11	n	y	nonsevere	mild	133	1	above average	9.5	2	18	1.4061	4	4	5	6	2	6	1	1	1	0	1	7	4	1	1	1	4	9	6	26	268.733	2.5631	351.7	7
p240	patient	f	55	9	n	n	nonsevere	mild	74	0	good	13	7	16	1.259	5	5	7	4	5	7	1	1	1	1	1	5	4	1	1	1	3	7	6	23	-29.4094	4.2561	379.257	15
p241	patient	m	54	9	n	y	severe	severe	74	0	average	6.25	5	16	1.5038	4	4	7	7	1	1	1	1	1	0	1	2	3	0	1	0	4	8	6	22	201.531	1.8055	510.056	12
p242	patient	m	35	16	n	n	nonsevere	mild	99	0	below average	17.25	10	17	1.4951	5	2	5	4	4	5	1	1	1	1	1	9	4	1	2	1	4	10	6	28	48.5401	4.2561	312.814	0
p243	patient	f	55	9	n	n	severe	severe	88	0	poor	2.25	6	17	2.3994	5	7	7	7	7	7	1	1	1	1	1	5	4	0	1	0	3	7	6	21	220.494	2.766	357.143	1
p244	patient	f	60	12	n	n	severe	critical	75	0	below average	7	4	12	1.7823	3	4	7	4	7	7	1	1	0	0	1	5	3	1	2	0	3	8	6	23	185.23	2.2215	369.978	22
p245	patient	f	26	16	n	n	nonsevere	mild	99	0	average	7.25	6	17	1.5894	4	7	7	7	7	7	1	1	1	0	1	8	4	1	2	1	6	9	6	29	314.775	3.0022	353.536	3
p246	patient	m	27	15	n	y	nonsevere	mild	83	0	average	10.75	9	15	2.0548	4	4	6	5	3	3	1	1	1	0	1	5	4	1	2	1	6	7	6	27	20.0542	3.6678	311.043	0
p247	patient	f	57	15	n	n	severe	severe	110	0	above average	7.25	4	17	1.5049	5	4	7	7	4	4	1	1	1	1	1	6	4	0	1	1	4	5	6	21	474.267	3.2897	437.159	2
p248	patient	f	63	16	n	n	severe	severe	123	2	average	4.25	5	15	1.8231	4	5	7	7	4	1	1	1	1	1	0	2	4	1	2	1	5	9	6	28	236.931	2.0729	420.286	5
p249	patient	f	39	6	n	n	nonsevere	moderate	77	0	above average	10.75	7	10	2.5668	5	7	7	7	4	7	1	1	1	1	1	5	2	0	0	0	0	7	6	15	443.608	2.766	529.955	13
p250	patient	f	42	15	n	n	nonsevere	moderate	92	0	average	7	9	16	1.9478	5	4	4	7	5	1	1	1	1	1	1	7	4	1	2	1	5	6	6	25	39.1213	4.2561	381.329	7
p251	patient	f	39	12	n	n	nonsevere	moderate	86	0	average	8	4	17	1.855	5	6	6	6	1	6	1	1	1	1	1	4	4	1	2	1	6	9	6	29	-72.7872	4.2561	389.064	3
p252	patient	m	52	12	n	n	severe	severe	124	0	above average	13	5	16	1.3827	5	4	5	5	3	4	1	1	1	1	1	4	2	1	1	0	6	7	6	23	-14.2908	2.3836	360.621	0
p253	patient	f	65	12	n	n	severe	severe	98	2	average	17	8	17	0	4	1	7	4	4	1	1	1	1	0	1	5	4	1	1	1	5	4	6	22	241.352	3.6678	426.281	7
p254	patient	f	55	15	n	n	severe	severe	66	0	average	7.5	3	13	1.0033	5	6	6	4	7	7	1	1	1	1	1	4	4	1	2	1	5	5	6	24	125.854	3.2897	375.986	10
p255	patient	f	60	12	n	n	nonsevere	moderate	97	0	poor	15.25	7	14	2.0402	4		7	7	1	7	0	1	1	1	1	5	4	1	2	1	6	8	6	28	-55.1307	2.5631	335.857	12
p256	patient	f	48	9	n	n	nonsevere	mild	87	0	below average	3.75	6	15	1.5339	4	4	4	7	1	4	1	1	1	0	1	5	4	1	2	1	3	9	6	26	0.2167	3.0022	461.074	2
p257	patient	m	48	9	n	n	nonsevere	moderate	96	0	below average	7.25	5	14	1.8471	4	4	7	6	3	5	1	1	1	0	1		4	1	2	1	3	7	5	23	-92.0915	4.2561	365.221	10
p258	patient	m	37	17	n	y	nonsevere	moderate	99	0	average	14.25	10	16	1.6968	4	1	6	5	4	1	0	1	1	1	1	5	4	1	2	1	4	8	6	26	13.4967	4.2561	363.736	5
p259	patient	m	63	7	n	y	nonsevere	mild	100	1	good	15.5	5	16	0.6978	5	6	7	7	7	3	1	1	1	1	1	6	3	1	0	1	3	8	5	21	9.9773	4.2561	459.6	3
p260	patient	f	60	6	n	n	nonsevere	mild	86	0	poor	0	3.33	4.5		5	7	7	7	5	7	1	1	1	1	1	0	3	0	0	1	3	7	5	19	37.2659	2.5631	410.696	8
p261	patient	f	55	12	n	n	nonsevere	moderate	69	0	below average	7.25	8	6	1.7809	5						1	1	1	1	1	2	4	1	0	1	5	8	6	25	-34.1349	3.0022	476.057	4
p262	patient	f	64	10	n	n	severe	severe	98	0	average	3.5	2	14	2.0073	4	4	5	4	5	4	0	1	1	1	1	0	3	1	1	0	2	4	5	16		0.1673	396.783	8
p263	patient	f	48	12	n	n	nonsevere	mild	109	0	below average	6.25	6	13	1.4608	5	3	6	7	6	7	1	1	1	1	1	7	4	1	2	1	6	9	6	29	205.45	3.0022	423.921	12
p264	patient	f	48	12	n	n	nonsevere	moderate	106	0	above average	15	7	17	1.1882	5	7	7	4	4	7	1	1	1	1	1	5	4	1	2	1	4	9	6	27	-47.9226	4.2561	421.2	2
p265	patient	f	39	15	n	n	nonsevere	mild	95	0	below average	8.5	5	15	1.9403	5	5	7	7	7	7	1	1	1	1	1	6	4	1	0	1	5	8	6	25	85.6562	4.2561	397.6	2
p266	patient	f	42	8	n	n	nonsevere	mild	119	1	average	10.25	7	16	1.5339	5	4	4	4	4	4	1	1	1	1	1	7	4	0	1	1	2	4	6	18	-74.8098	4.2561	523.409	9
p267	patient	f	48	15	n	n	nonsevere	moderate	117	0	average	14	7	17	1.1974													3	1	2	1	5	10	6	28	-122.979	3.0022	446.453	1
p268	patient	m	53	9	n	y	severe	severe	154	1	above average	5.5	7	11	1.1448	5	4	7	4	5	6	1	1	1	1	1		1	0	0	1	3	4	6	15	131.057	3.0022	491.814	1
p269	patient	m	66	6	n	y	severe	severe	156	3	average	4.75	5	16	2.1144																								2
p270	patient	f	50	15	n	n	nonsevere	moderate	107	0	average	9.25	5	18	0.8498	5	7	7	7	7	5	1	1	1	1	1	8	3	1	2	1	5	9	6	27	288.864	2.5631	342.979	2
p271	patient	m	29	12	n	n	nonsevere	mild	156	0	good	8	7	17	1.5339	4	4	7	7	4		1	1	1	1	0	5	4	1	0	1	5	10	5	26	79.8583	3.2897	392.295	1
p272	patient	f	37	9	n	n	severe	severe	155	0	good	5.5	5	18	1.5435	3	4	4	7	4	4	0	1	1	1	0	7	4	1	2	1	6	8	6	28	212.417	4.2561	449.314	2
p273	patient	f	52	9	n	n	nonsevere	moderate	154	0	good	12	7	18	1.5339	5	4	6	7	5	4	1	1	1	1	1	7	2	1	0	1	4	9	5	22	81.381	1.567	320.286	2
p274	patient	f	49	6	n	n	nonsevere	moderate	155	0	good	17.25	6	12	2.3009	5	4	4	7	4	3	1	1	1	1	1	6	2	0	0	1	3	6	6	18	-534.989	2.766	496.867	2
p275	patient	f	57	12	n	n	severe	severe	155	0	average	3.75	6	17	0.6183	4	4	4	6	2	2	1	1	1	1	0	5	2	1	0	1	3	7	6	20	189.24	3.0022	410.421	7
p276	patient	f	58	10	n	n	nonsevere	mild	105	1	average	7.5	4	18	1.641	4	6	6	7	2	1	1	1	1	1	0	7	3	1	2	1	5	9	6	27	231.023	4.2561	455.414	15
p277	patient	f	58	10	n	n	nonsevere	moderate	91	0	poor	0	2	9	1.4009	5	6	4	6	2	1	1	1	1	1	1	5	4	1	1	1	2	8	5	22	46.8417	2.3836	481.46	18
p278	patient	m	56	12	n	n	nonsevere	moderate	105	0	below average	12	8	15	2.4071	5	4	4	7	7	4	1	1	1	1	1	8	3	0	1	1	5	9	6	25	-97.6188	2.5631	340.657	5
p279	patient	f	33	15	n	n	nonsevere	mild	77	0	average	13.75	6	15	1.5339	5	7	7	7	7	4	1	1	1	1	1		3	0	1	1	5	9	6	25	-103.127	4.2561	427.65	0
p280	patient	f	34	15	n	n	nonsevere	moderate	132	0	above average			17	2.058													4	1	2	1	6	8	6	28				35
p281	patient	m	32	27	n	n	nonsevere	mild	119	0	average	6.75	8	16	1.8471	5	1	7	4	4	4	1	1	1	1	1	5	4	1	2	1	5	8	6	27	-170.283	2.5631	433.912	12
p282	patient	m	56	15	n	y	nonsevere	mild	126	1	average	10.25	5	13	1.4775	3	3	4	6	2	4	0	1	1	0	1	6	4	1	1	1	5	8	6	26	89.294	3.6678	497.453	9
p283	patient	m	37	12	n	n	nonsevere	moderate	109	0	average	9.5	9	16	0.7838	5	2	6	5	4	3	1	1	1	1	1	4	4	1	1	1	6	9	6	28	96.9728	4.2561	338.743	2
p284	patient	f	42	12	n	n	nonsevere	moderate	129	0	below average	9.25	7	15	1.9403	3	4	4	7		4	1	1	1	0	0	3	3	0	1	1	5	7	5	22	98.8378	3.6678	401.829	11
p285	patient	m	66	2	n	n	nonsevere	mild	154	0	average	3.25	5	14	0.8489	5	6	7	7	7	5	1	1	1	1	1		2	0	0	0	4	4	5	15		2.2215	508.314	6
p286	patient	f	58	12	n	n	severe	severe	156	1	average	10.25	3	16	2.1963	5	7	7	7	1	2	1	1	1	1	1	7	3	1	1	1	3	5	6	20	-33.3118	3.6678	481.336	6
p287	patient	m	42	9	n	n	nonsevere	moderate	154	0	poor	14	5	16	1.4246	5	2	6	7	6	5	1	1	1	1	1	4	2	0	1	1	6	8	5	23	-0.1023	2.3836	385.964	5
p288	patient	m	32	19	n	y	severe	severe	156	0	above average	11.75	7	16	1.1318	5	4	6	7	5	7	1	1	1	1	1	6	4	1	2	1	4	8	6	26	35.4652	4.2561	411.321	10
p289	patient	f	74	12	n	y	nonsevere	mild	122	0	above average	7.25	8	16	1.0432	5	4	5	4	4	4	1	1	1	1	1	5	4	1	2	1	4	10	6	28	62.1059	2.5631	359.935	3
p290	patient	m	57	16	n	y	nonsevere	moderate	106	1	good	6.75	4	17	1.3956	5	2	6	5	5	3	1	1	1	1	1	3	4	1	2	1	6	9	6	29	95.4886	3.0022	372.271	1
p291	patient	m	60	9	y	y	nonsevere	mild	149	1	good	5.25	3	16	1.1504	5	4	6	5	4	4	1	1	1	1	1	7	4	1	2	1	5	8	6	27	48.2241	4.2561	426.593	1
p292	patient	m	57	13	n	n	nonsevere	moderate	153	1	average	9.5	6	16	1.5925	3	1	5	3	4	3	1	1	1	0	0	3	2	0	1	1	3	6	6	19	396.101	1.0488	384.848	4
p293	patient	f	63	6	y	n	nonsevere	mild	150	0	average	9		12	2.0073													2	0	1	1	3	3	5	15				1
p294	patient	m	55	12	y	y	nonsevere	mild	161	0	average	14.5	5	14	1.819	5	4	4	7	7	4	1	1	1	1	1	4	3	1	1	0	4	5	6	20	342.179	2.766	362.5	20
p295	patient	m	35	16	n	n	severe	severe	149	0	above average	10.5	9	15	1.2628	5	1	5	6	5	4	1	1	1	1	1	7	4	1	2	1	4	10	6	28	22.3076	3.0022	360.243	2
p296	patient	f	65	15	n	n	nonsevere	moderate	152	0	average	9.75	7	18	1.2834	5	7	6	7	5	6	1	1	1	1	1	4	4	1	1	1	4	7	6	24	258.767	1.2459	349.87	4
p297	patient	f	57	7	n	n	nonsevere	mild	173	0	average	4.75	4	14	0.9634	5	4	6	7	2	4	1	1	1	1	1	2	2	0	0	1	1	4	6	14	-5.8486	2.2215	423.21	5
p298	patient	m	60	16	n	y	nonsevere	moderate	148	1	good	15	3	16	1.3477	5	1	6	4	3	3	1	1	1	1	1	6	3	1	2	1	5	9	6	27	-34.3343	4.2561	469.193	0
p299	patient	m	68	7	n	n	nonsevere	moderate	94	0	average	5.5	7	13	0.6077	5	5	6	6	6	6	1	1	1	1	1	4	3	0	0	1	5	6	6	21		2.3836	413.489	4
p300	patient	m	52	12	n	n	severe	severe	121	0	above average	9.5	7	15	1.0432	4	2	4	2	2	3	1	1	1	0	1	9	4	1	2	1	5	9	6	28	56.4487	4.2561	446.55	4
p301	patient	f	35	15	n	n	nonsevere	moderate	149	0	poor	1.75	3	17	1.0369	3	3	6	4	4	1	0	1	0	1	1	6	4	0	2	1	4	7	6	24	984.167	3.6678	365.014	1
p302	patient	m	57	16	n	n	nonsevere	moderate	156	0	average	7.5	7	15	1.1504	4	4	7	5	7	4	0	1	1	1	1	7	3	0	1	1	4	7	5	21	225.644	2.5631	460.964	0
p303	patient	f	46	9	n	n	nonsevere	moderate	123	0	below average	8.25	2	11	1.7823	4	4	7	7	4	4	1	1	1	1	0	7	2	0	1	1	2	9	6	21	1.2262	4.2561	463.583	16
p304	patient	f	65	12	n	n	nonsevere	mild	144	0	good	11.5	9	17	1.0416	3	7	7	7	4	7	0	0	1	1	1	6	4	0	1	1	4	9	5	24	230.279	1.6832	356.557	0
p305	patient	f	56	14	n	n	nonsevere	moderate	150	0	good	8.5	7	17	1.1318	5	4	7	3	4	5	1	1	1	1	1	5	4	1	1	1	4	10	6	27	8.7805	3.6678	493.35	2
p306	patient	f	66	9	n	n	nonsevere	mild	150	1	average	6.5	6	17	1.2776	5	3	6	6	4	6	1	1	1	1	1	4	3	0	1	1	5	8	6	24	185.103	3.2897	532.657	0
p307	patient	m	57	16	n	n	nonsevere	moderate	129	0	average	10.5	7	13	1.855	5	4	7	7	4	7	1	1	1	1	1	9	4	1	2	1	5	7	6	26	119.258	1.4558	366.107	0
p308	patient	f	55	10	n	n	nonsevere	moderate	150	2	average	8.25	8	17	1.4142	5	7	7	7	4	7	1	1	1	1	1	9	2	0	0	1	2	7	5	17	297.71	1.349	552.492	15
p309	patient	m	57	12	n	n	nonsevere	mild	94	1	below average	6.75	7	17	0.8556	5	2	6	4	3	3	1	1	1	1	1	6	4	1	2	1	4	7	6	25	-91.4991	3.0022	360.321	1
p310	patient	f	53	6	n	n	nonsevere	mild	116	0	good	8.5	7	17	1.5435	4	7	7	7	7	1	1	1	1	1	0	8	2	0	0	1	5	7	6	21	344.959	3.0022	572.756	1
p311	patient	m	38	16	n	n	nonsevere	moderate	150	0	good	5.75	6	17	0.9984	5	7	7	7	7	7	1	1	1	1	1	10	4	1	2	1	5	6	6	25	167.218	4.2561	425.964	0
p312	patient	m	47	12	y	n	nonsevere	moderate	149	1	average	6.25	7	15	1.2314	5	6	6	6	6	6	1	1	1	1	1	6	4	1	0	1	3	7	5	21	174.309	4.2561	408.336	0
p313	patient	f	73	12	n	n	nonsevere	moderate	149	3	above average	5.5	2	15	1.1827	4	3	5	1	3	3	1	1	1	1	0	5												2
p314	patient	m	40	9	n	n	nonsevere	mild	149	1	good	7	7	11	1.1275	5	7	6	6	6	5	1	1	1	1	1	2	4	1	1	1	5	8	6	26	183.909	4.2561	442.59	1
p315	patient	f	40	16	n	n	nonsevere	mild	151	0	above average	20	7	16	2.0041	5	7	7	7	7	4	1	1	1	1	1	9	4	1	2	1	6	9	6	29	70.8927	4.2561	407.525	8
p316	patient	m	59	16	n	y	nonsevere	moderate	150	0	average	11.5	7	15	1.6202	4	1	7	7	3	5	0	1	1	1	1	5	4	1	2	1	4	9	6	27	110.403	3.6678	440.979	2
p317	patient	f	66	12	n	n	nonsevere	moderate	28	0	below average	6.5	6	17	1.1504	5	5	4	7	4	4	1	1	1	1	1		3	1	2	1	4	9	6	26	153.261	1.349	368.259	7
p318	patient	f	51	16	n	n	nonsevere	moderate	110	0	average	5.5	8	18	2.1144	4	7	7	7	7	7	1	1	1	1	0	5	3	1	2	1	4	10	6	27	-59.9546	3.2897	413.357	18
p319	patient	f	51	5	n	n	nonsevere	moderate	150	1	average	12	7	15	2.9104	5	4	7	7	3	4	1	1	1	1	1	7	2	0	0	1	2	5	6	16	24.1964	2.766	473.686	0
p320	patient	m	61	12	n	n	nonsevere	moderate	150	1	good	10.75	7	18	1.1504	4	7	7	7	7	4	1	1	1	1	0	7	4	1	2	1	6	5	6	25	35.2853	3.0022	513.299	0
p321	patient	f	62	15	n	y	nonsevere	mild	143	1	average	9.5	7	17	1.2834	5	4	7	7	4	4	1	1	1	1	1	4	4	1	1	1	4	7	6	24	80.7472	3.6678	444.05	0
p322	patient	m	67	12	n	n	nonsevere	moderate	150	0	average	8.5	8	10	0.7071	4	4	4	6	4	4	0	1	1	1	1		3	1	1	1	3	8	6	23	1331.54	2.2215	442.575	2
p323	patient	f	40	16	n	n	nonsevere	moderate	150	0	good	20	8	17	1.8231	5	4	4	4	4	4	1	1	1	1	1	6	4	1	2	1	3	8	6	25	354.673	3.2897	398.343	1
p324	patient	f	49	9	n	n	nonsevere	mild	123	0	poor	7.5	7	13	1.5038	4	1	4	4	1	1	1	1	1	1	0	4	3	1	1	1	3	7	6	22	47.3808	1.9348	321.036	21
p325	patient	f	51	7	n	n	nonsevere	moderate	137	0	average	8.75	5	15	1.3827	4	6	6	6	3	6	1	1	1	0	1	5	4	0	0	1	3	7	6	21	-326.988	3.6678	456.072	13
p326	patient	f	42	9	n	n	nonsevere	moderate	120	0	above average	6.75	9	16	1.7489	5	4	7	7	4	4	1	1	1	1	1	4	3	1	1	1	4	9	6	25	129.434	4.2561	452.757	8
p327	patient	f	48	16	n	n	nonsevere	mild	149	0	average	15.75	5	18	1.1504	5	4	7	7	7	5	1	1	1	1	1	9	4	1	2	1	6	9	6	29	-19.5889	2.766	320.693	0
p328	patient	m	52	16	n	y	nonsevere	moderate	146	1	above average	15.5	6	17	1.1504	5	6	5	6	6	5	1	1	1	1	1	5	4	1	0	1	6	8	6	26	147.586	4.2561	444.779	5
p329	patient	m	50	9	n	n	nonsevere	mild	149	0	average	5.5	6	16	1.5435	4	2	4	3	5	1	1	1	1	1	0	5	4	0	0	0	5	6	6	21	668.3	4.2561	423.4	10
p330	patient	f	44	9	n	n	nonsevere	mild	71	0	average	13.75	5	16	0.9701	4	4	7	7	4	7	1	1	1	0	1	5	3	1	0	1	3	8	6	22	86.2263	3.0022	492.007	2
p331	patient	m	51	9	n	n	nonsevere	mild	150	1	average	0	3.33	4.5		4	4	4	4	4	4	0	1	1	1	1	4	4	1	2	1	4	8	6	26	183.453	3.2897	429.693	0
p332	patient	f	36	16	n	n	nonsevere	mild	148	0	above average	9	10	18	1.4642	4	5	6	7	4	3	1	1	1	1	0	5	4	1	2	1	4	10	6	28	95.3043	3.6678	344.721	1
p333	patient	m	57	12	n	y	nonsevere	mild	147	0	good	10	6	16	0	4	4	7	7	6	4	1	1	1	1	0	7	4	1	0	1	4	7	6	23	926.475	4.2561	521.15	0
p334	patient	m	64	12	n	n	nonsevere	mild	155	0	average	8.5	7	16	0.9852	5	4	4	5	4	5	1	1	1	1	1	6	3	0	1	1	4	9	6	24	118.886	2.3836	424.389	0
p335	patient	f	44	8	n	n	severe	severe	112	0	average	7.75	8	15	1.5894	5	6	6	4	6	4	1	1	1	1	1	7	3	1	2	1	3	9	6	25	47.2839	4.2561	361.551	5
p336	patient	f	52	16	n	n	nonsevere	mild	164	0	below average	8.5	7	18	1.4096	5	2	5	5	5	2	1	1	1	1	1	4	4	1	1	1	6	5	6	24	-141.517	4.2561	322.05	7
p337	patient	m	48	14	n	y	severe	severe	133	0	average	6	6	14	1.5676	5	5	6	3	4	6	1	1	1	1	1	8	4	1	1	1	4	9	6	26	-10.9944	3.2897	457.7	7
p338	patient	f	68	9	n	n	severe	severe	110	1	average	6.5	4	13	1.5801	5	4	6	5	6	5	1	1	1	1	1	7	3	0	1	0	3	5	5	17		0.95408	385.126	3
p339	patient	f	61	12	n	n	nonsevere	moderate	116	0	average	7.5	8	18	1.5005	5	4	6	3	6	5	1	1	1	1	1	6	1	1	1	1	4	7	6	21	-8.4605	1.4558	359.221	3
p340	patient	f	39	15	n	n	nonsevere	mild	137	0	above average	17.75	7	17	1.3198	5	3	4	3	4	3	1	1	1	1	1	6	4	1	2	1	5	8	6	27	113.885	4.2561	417.714	2
p341	patient	f	47	16	n	n	nonsevere	mild	142	0	below average	9.5	7	14	1.5297	5	7	7	6	6	5	1	1	1	1	1	6	4	1	1	1	5	9	6	27	118.111	4.2561	375.271	2
p342	patient	m	38	16	n	n	nonsevere	moderate	145	0	average	11.5	7	18	0.8948	5	3	4	5	4	5	1	1	1	1	1	3	4	1	2	1	6	7	6	27	157.489	4.2561	346.207	9
p343	patient	m	24	18	n	n	nonsevere	mild	138	0	above average	8.25	8	16	1.372	3	3	5	6	4	4	0	1	1	1	0	6	4	1	2	1	6	8	6	28	15.3295	1.9348	317.879	11
p344	patient	f	57	9	n	n	nonsevere	moderate	123	0	below average	9.25	5	16	0.9852	5	3	5	5	4	4	1	1	1	1	1	6	2	0	1	1	2	6	6	18	698.553	3.2897	407.158	10
p345	patient	m	65	12	y	y	nonsevere	moderate	141	0	above average	9.25	7	12	1.9844												5	3	0	2	1	4	6	6	22	703.1	1.6832	450.486	1
p346	patient	m	64	12	y	n	nonsevere	moderate	146	0	average	4.5		15	0																								0
p347	patient	f	36	15	n	n	nonsevere	mild	106	0	above average	11	6	16	1.7978	3	6	4	5	5	4	1	1	1	0	0	8	4	0	2	1	6	8	6	27	39.8298	3.2897	331.6	7
p348	patient	f	53	8	n	n	nonsevere	moderate	152	0	average	10.5	3	18	1.6803	5	1	5	7	4	4	1	1	1	1	1	7	3	1	2	1	6	9	6	28	140.866	1.8055	388.957	10
p349	patient	f	64	14	n	n	severe	critical	126	1	poor	15.25	5	7	1.1275	5	7	5	6	4	2	1	1	1	1	1	7	4	1	2	1	4	8	6	26	90.5227	2.766	441.554	11
p350	patient	m	40	16	n	n	nonsevere	mild	130	0	average	10.75	9	16	1.3636	5	5	5	6	4	6	1	1	1	1	1	4	4	1	2	1	4	9	6	27	-61.7835	4.2561	345.2	2
p351	patient	f	49	15	n	n	nonsevere	mild	119	0	average	11.5	7	18	1.3827	5	4	4	4	4	7	1	1	1	1	1	6	4	0	1	1	5	9	6	26	24.5597	4.2561	382.421	6
p352	patient	m	57	12	n	n	severe	severe	160	1	average	18	6	15	1.4337	5	3	7	7	7	6	1	1	1	1	1	9	4	1	1	1	4	6	6	23	741.892	3.2897	434.217	0
p353	patient	f	36	16	n	n	nonsevere	mild	132	0	poor	20	4	17	1.715	5	6	7	7	4	6	1	1	1	1	1		4	1	1	1	6	9	6	28	101.838	2.3836	313.8	3
p354	patient	f	67	9	n	n	nonsevere	mild	153	0	average	7.5	6	16	0.3835	5	2	7	5	5	5	1	1	1	1	1	6	3	1	1	1	5	6	6	23	223.983	2.3836	446.836	0
p355	patient	m	72	12	n	n	severe	severe	138	1	average	6.5	7	17	2.4254	5	7	7	7	4	4	1	1	1	1	1	5	4	0	1	1	4	6	6	22	133.728	3.2897	366.114	0
p356	patient	m	66	17	y	n	nonsevere	moderate	154	0	average	20	6	14	2.058	5	4	4	4	7	1	1	1	1	1	1	8	4	1	2	0	5	7	6	25	229.462	2.766	465.023	1
p357	patient	m	73	9	y	y	nonsevere	mild	76	1	above average	9.25	5	14	1.7809	5	4	7	7	7	4	1	1	1	1	1	7	4	1	2	1	5	10	6	29	311.127	3.2897	447.836	1
p358	patient	f	64	15	n	n	nonsevere	moderate	163	1	good	10	5	17	0.9164																								5
p359	patient	m	66	9	y	y	nonsevere	moderate	153	1	average	10.5	3	14	1.4142	5	1	4	4	5	4	1	1	1	1	1	5	4	1	2	1	6	6	6	26	17.5009	4.2561	477.657	1
p360	patient	f	45	15	n	n	nonsevere	moderate	112	0	average	6.75	6	16	2.3515	4	1	7	7	1	4	1	1	1	0	1	4	4	0	2	0	4	9	6	25	100.711	2.766	438.101	9
p361	patient	f	50	19	n	n	nonsevere	mild	152	0	above average	8.75	8	17	0.9235	5	2	6	4	6	4	1	1	1	1	1		4	1	2	1	5	8	6	27	117.136	2.2215	411.079	3
p362	patient	m	49	9	n	y	nonsevere	mild	130	0	average	14.25	6	13	1.7786													3	1	0	1	3	8	6	22		0.86145	406.743	0
p363	patient	f	54	12	n	n	nonsevere	moderate	120	0	good	5.5	1	14	1.8471	5	1	7	7	7	7	1	1	1	1	1	8	3	1	0	1	4	5	6	20	81.9487	3.2897	402.293	1
p364	patient	f	55	11	n	n	severe	severe	151	0	above average	16	7	18	1.629	5	4	6	7	6	7	1	1	1	1	1	7	4	1	2	1	6	10	6	30	46.8363	4.2561	360.1	3
p365	patient	f	55	9	n	n	nonsevere	moderate	152	0	average	13	5	12	2.4071	5	1	4	4	7	4	1	1	1	1	1	8	4	0	0	1	2	5	6	18	27.4348	3.2897	451.686	6
p366	patient	f	66	9	n	n	nonsevere	moderate	152	0	average	12.5	8	15	1.3492	5	5	6	6	6	5	1	1	1	1	1	5	3	1	1	1	4	8	6	24	52.5182	2.766	413.093	7
p367	patient	m	73	9	n	y	nonsevere	moderate	153	0	good	8.5	7	16	0.9376	5	4	6	7	4	4	1	1	1	1	1	8	4	1	0	1	4	5	6	21	49.7773	1.349	466.073	8
p368	patient	f	69	12	n	n	nonsevere	moderate	91	1	average	10	4	11	1.7823	5	4	7	7	4	4	1	1	1	1	1	4	4	0	1	1	4	5	6	21	-143.306	0.95408	377.543	7
p369	patient	f	86	0	n	n	nonsevere	mild	152	1	poor	0	2	6	1.8328	4	2	7	7	4	7	1	1	1	1	0													2
p370	patient	f	75	15	n	n	nonsevere	moderate	153	0	average	14.25	6	16	1.7452	3	4	7	7	4	4	0	1	1	0	1		4	1	2	1	5	10	6	29	262.878	2.0729	439.514	4
p371	patient	m	68	9	n	n	nonsevere	moderate	152	1	average	9.5	4	12	0.6764	5	2	6	5	2	2	1	1	1	1	1	6	4	0	0	1	3	6	6	20	161.952	4.2561	375.65	1
p372	patient	f	65	6	n	n	nonsevere	moderate	152	0	average	5.25	6	9	1.9967	4		7	6	4	1	0	1	1	1	1	5	1	0	0	1	3	7	5	17		1.6832	509.968	3
p373	patient	f	65	12	n	n	nonsevere	mild	153	1	above average	6.75	3	14	1.1448	5	3	4	3	3	2	1	1	1	1	1	4	3	1	1	1	3	8	6	23				0
p374	patient	f	65	12	n	n	nonsevere	moderate	153	0	average	8.25	4	13	1.4742	5	4	7	7	7	4	1	1	1	1	1	5	3	1	1	1	3	9	6	24	75.3409	1.567	331.057	10
p375	patient	m	28	15	y	n	nonsevere	mild	149	0	below average	18.5	9	17	1.4653	5	3	6	7	7	6	1	1	1	1	1	5	4	1	2	1	6	10	6	30	0.6458	4.2561	347.386	8
p376	patient	m	49	12	y	y	nonsevere	mild	127	0	average	13.75	8	16	2.1144	5	4	7	7	7	4	1	1	1	1	1	8	3	1	1	1	4	6	6	22	229.441	3.2897	312.121	2
p377	patient	m	58	12	n	n	nonsevere	mild	145	1	average	7.75	2	16	0.9701	5	3	4	4	4	4	1	1	1	1	1	6	3	1	1	0	3	8	6	22	60.3478	4.2561	440.921	7
p378	patient	m	48	12	n	y	nonsevere	moderate	152	0	average	6.5	5	17	1.3827	4	7	7	7	7	4	0	1	1	1	1	6	3	1	2	1	5	8	1	21	7.7728	3.2897	412.9	0
p379	patient	f	58	12	n	n	nonsevere	moderate	155	0	below average	8.75	6	14	1.4246	5	6	7	5	7	5	1	1	1	1	1	5	4	1	2	1	4	8	6	26				1
p380	patient	f	52	9	n	n	nonsevere	moderate	153	0	average	14.5	6	16	2.1144	5	2	3	7	2	5	1	1	1	1	1	6	2	1	0	1	3	9	6	22	44.0213	2.5631	461.259	2
p381	patient	f	40	7	n	n	nonsevere	mild	153	0	good	7	6	17	2.1057	5	1	7	7	4	4	1	1	1	1	1	7	4	1	1	1	3	9	6	25	277.782	3.2897	328.643	2
p382	patient	m	51	12	n	y	severe	severe	153	0	above average	7.5	5	16	1.8231	5	4	5	5	6	4	1	1	1	1	1	4	3	0	0	1	2	6	5	17	29.4009	3.0022	463.986	4
p383	patient	f	63	12	n	n	nonsevere	mild	153	0	good	11	3	15	2.2177	5	2	6	6	7	5	1	1	1	1	1	4	4	1	2	1	3	7	6	24	-45.0344	2.766	397.293	5
p384	patient	f	78	2	n	n	nonsevere	mild	161	0	above average	14		10	1.4778																								5
p385	patient	m	44	15	n	n	nonsevere	mild	155	1	average	4	3	15	2.0934	5	4	4	3	5	7	1	1	1	1	1	3	4	1	1	1	3	8	6	24	-12.0787	1.8055	353.504	13
p386	patient	f	69	16	n	n	severe	severe	131	1	below average	4.5	9	16	1.5049	5	1	4	4	6	4	1	1	1	1	1	9	3	1	2	1	6	10	6	29	123.66	4.2561	436.357	9
p387	patient	f	49	9	n	n	nonsevere	moderate	152	0	good	7.25	8	18	1.815	5	4	6	7	3	5	1	1	1	1	1	5	3	1	1	1	4	7	6	23	-52.025	3.2897	409.899	6
p388	patient	f	52	1	n	n	severe	severe	147	1	average	19.25	5	15	0.8575	5	7	7	7	7	5	1	1	1	1	1	5	2	0	0	1	3	4	4	14		3.0022	546.052	12
p389	patient	m	32	16	y	y	nonsevere	mild	3	1	good	10.25	9	18	1.2485	4	2	6	5	6	5	1	1	1	1	0	5	4	1	2	1	5	9	6	28	132.774	4.2561	455.314	0
p390	patient	f	47	12	n	n	nonsevere	moderate	152	0	average	7.25	8	18	1.855	5	7	4	7	7	7	1	1	1	1	1	2	4	1	2	1	5	10	6	29	-169	3.6678	407.864	5
p391	patient	m	65	19	n	n	nonsevere	mild	160	0	above average	9.75	7	17	0.8556	5	3	5	6	5	4	1	1	1	1	1	6	4	1	1	1	6	7	6	26	179.527	4.2561	351.386	0
p392	patient	f	53	16	n	n	nonsevere	mild	146	0	below average	9.5	5	12	1.4653	5	6	5	5	6	4	1	1	1	1	1	5	4	1	1	1	4	8	6	25	164.219	4.2561	540.143	17
p393	patient	f	46	12	n	n	nonsevere	mild	138	0	poor	0	3.33	4.5		5	4	5	5	7	4	1	1	1	1	1	4	4	1	2	1	6	8	4	26	-242.084	1.9348	383.964	6
p394	patient	f	66	12	n	n	nonsevere	moderate	163	0	average	6.5	6	17	1.7342	5	2	7	7	7	5	1	1	1	1	1	6	4	1	2	1	3	9	6	26	122.121	2.5631	373.216	7
p395	patient	m	67	9	n	n	severe	critical	153	0	good	1.5	5	14	1.0922	5	3	4	5	5	4	1	1	1	1	1	4	4	0	1	1	3	5	5	19		3.0022	400.899	4
p396	patient	f	60	12	y	n	nonsevere	mild	103	0	good	18.25	5	13	1.0847	4	2	4	3	4	6	0	1	1	1	1	5	3	1	1	1	5	8	6	25	198.224	2.2215	428.583	4
p397	patient	f	64	9	n	n	nonsevere	mild	152	1	average	6.5		8	1.2433													2	1	0	1	3	4	2	13				4
p398	patient	f	57	12	n	n	nonsevere	mild	161	0	average	11.5	6	15	2.1213	4	7	7	7	4	4	1	1	1	1	0	6	2	0	0	1	4	9	6	22	73.1909	1.4558	366.393	1
p399	patient	f	48	12	n	n	nonsevere	moderate	153	1	average	6.25	4	5	1.5435	5	4	4	4	7	4	1	1	1	1	1	6	2	1	2	1	2	7	6	21	181.809	2.2215	393.607	11
p400	patient	f	65	12	n	n	severe	severe	132	1	average	6.5	7	17	1.7823	4	4	7	4	4	1	1	1	1	0	1	6	1	1	2	1	3	9	6	23	46.7446	1.9348	398.893	6
p401	patient	f	56	10	n	n	severe	severe	125	0	average	8.25	10	18	1.5038	5	3	7	6	5	3	1	1	1	1	1	5	4	1	2	1	5	10	6	29	177.203	3.2897	348.393	2
p402	patient	f	69	9	n	n	nonsevere	moderate	154	0	average	0	6	17	1.1376	5	4	4	1	4	4	1	1	1	1	1	5	4	1	1	1	6	9	6	28	34.236	4.2561	646.157	2
p403	patient	f	57	15	n	n	severe	critical	115	0	good	6.5	8	14	2.3009	5	5	4	1	4	3	1	1	1	1	1		4	0	0	1	4	8	5	22	50.1064	3.2897	405.396	10
p404	patient	f	62	12	n	n	nonsevere	moderate	112	1	above average	8.25	9	18	1.8231	5	4	4	4	4	4	1	1	1	1	1	2	4	1	2	1	6	10	6	30	143.076	4.2561	605.568	4
p405	patient	f	58	9	n	n	nonsevere	moderate	154	0	average	13	6	17	1.5049	5	4	4	4	7	7	1	1	1	1	1	6	4	1	0	1	4	8	6	24	133.102	4.2561	614.413	2
p406	patient	f	51	11	n	n	nonsevere	moderate	152	0	average	14	7	17	1.3284	5	2	7	7	5	7	1	1	1	1	1	7	4	1	2	1	5	7	6	26	62.2068	2.0729	388.4	3
p407	patient	f	71	9	n	n	severe	severe	151	0	average	8.25	5	18	0.686	5	7	7	4	6	7	1	1	1	1	1	5	3	0	1	0	2	8	6	20		1.0488	468.03	1
p408	patient	m	38	12	n	n	nonsevere	moderate	124	0	average	9.5	5	16	1.5005	5	4	6	6	5	6	1	1	1	1	1	4	4	1	2	1	6	7	6	27	254.793	1.2459	302.607	0
p409	patient	f	57	12	n	n	severe	severe	145	0	good	16.5	5	15	1.6968	3	4	4	4	4	4	1	0	0	1	1	8	3	1	2	1	5	5	6	23	245.992	1.8055	489.355	0
p410	patient	m	22	16	y	n	nonsevere	mild	97	0	below average	6	7	15	1.641	5	2	4	4	2	2	1	1	1	1	1	5	4	1	2	1	6	8	6	28	485.196	3.6678	368.575	4
p411	patient	f	50	12	n	n	nonsevere	moderate	161	0	good	12	8	16	1.149	5	4	5	7	4	7	1	1	1	1	1	10	3	1	1	1	6	9	6	27	448.846	2.766	423	0
p412	patient	m	16	10	n	n	nonsevere	mild	168	0	average	7.25	8	14	1.2005	5	5	6	7	5	5	1	1	1	1	1	7	4	1	1	1	5	9	6	27	6.1268	2.2215	377.329	1
p413	patient	m	61	12	n	n	severe	severe	70	0	average	10.5	7	16	0.9701	5	7	7	7	7	7	1	1	1	1	1	5	4	0	2	1	4	9	6	26	-111.125	3.0022	442.836	1
p414	patient	f	61	12	n	n	nonsevere	mild	129	0	good	9.75	7	18	0.8575	5	4	5	7	4	5	1	1	1	1	1	7	4	1	0	1	4	9	6	25	63.3665	3.6678	385.25	11
p415	patient	m	61	10	n	y	nonsevere	moderate	126	3	good	11.5	6	14	1.0432	5	5	5	4	5	6	1	1	1	1	1	4	3	1	0	1	3	10	6	24	182.721	3.2897	394.628	0
p416	patient	f	69	9	n	n	severe	severe	151	0	average	5.5	8	14	1.8114	4	1	3	2	4	2	1	1	1	1	0	7	4	0	1	1	4	9	6	25		3.6678	489.044	6
p417	patient	m	72	9	n	y	severe	severe	152	2	average	13.5	5	13	0.8402	5	4	5	4	4	6	1	1	1	1	1	5	2	0	2	1	5	5	6	21	157.889	1.8055	409.793	1
p418	patient	f	39	12	n	n	nonsevere	mild	144	0	average	13.75	8	17	1.5645	5	2	6	7	7	7	1	1	1	1	1	4	4	1	2	1	4	10	6	28	134.864	3.2897	338.131	6
p419	patient	f	59	15	n	n	nonsevere	moderate	142	0	average	11.5	7	17	1.0432	5	3	7	6	5	2	1	1	1	1	1	5	4	1	2	1	4	8	6	26	10.8912	3.2897	442.201	20
p420	patient	f	58	12	n	n	nonsevere	moderate	94	2	poor	8.5	7	10	1.372	5	4	4	6	4	6	1	1	1	1	1	8	4	0	1	1	4	8	6	24	267.685	1.4558	384.254	10
p421	patient	f	53	11	n	n	nonsevere	moderate	134	0	average	9.5	10	17	1.4874	5	4	5	7	4	4	1	1	1	1	1	3	4	0	0	1	4	8	6	23	-39.3947	3.6678	411.086	7
p422	patient	m	63	12	n	n	nonsevere	mild	155	1	above average	3.5	8	17	1.6869	5	7	7	7	4	7	1	1	1	1	1	6	4	1	2	1	6	9	6	29	182.251	4.2561	419.029	1
p423	patient	m	61	16	n	n	nonsevere	mild	155	1	average	6.25	6	17	1.3346	5	3	7	6	6	3	1	1	1	1	1	3	4	0	0	1	4	9	6	24	84.2454	3.6678	422.621	0
p424	patient	m	61	9	n	n	nonsevere	moderate	154	1	average	5.5	5	16	0.7071	5	4	4	4	4	4	1	1	1	1	1	8	3	0	0	1	4	5	6	19		2.3836	389.664	0
p425	patient	f	29	15	n	n	nonsevere	mild	170	0	above average	9.5	7	17	1.3921	4	7	6	7	7	6	1	1	1	1	0	6	3	0	1	1	6	9	6	26	237.575	2.5631	409.707	2
p426	patient	m	84	12	n	n	severe	critical	164	1	below average	1.5	3	9	1.4678	4	4	6	6	6	4	1	1	1	1	0	5	2	0	0	0	4	5	5	16	281.671	2.5631	418.312	2
p427	patient	m	63	16	n	n	nonsevere	moderate	157	1	good	9.25	8	15	2.0292	5	4	7	7	7	4	1	1	1	1	1	5	2	0	0	1	5	8	6	22	271.936	4.2561	483.143	4
p428	patient	m	66	9	y	n	severe	severe	131	1	good	14.25	7	12	2.569	5	4	7	7	7	7	1	1	1	1	1		4	1	0	0	4	6	6	21	7.9276	2.5631	398.914	2
p429	patient	f	63	12	n	n	nonsevere	moderate	148	0	average	12.25	3	16	2.0934	4	1	7	7	4	7	0	1	1	1	1	5	3	0	1	0	3	5	6	18	429.437	1.4558	370.891	1
p430	patient	f	61	12	n	n	nonsevere	moderate	144	2	above average	6.5	6	15	2.0073	5	1	7	7	7	4	1	1	1	1	1	6	4	1	1	1	6	5	6	24	342.828			6
p431	patient	m	58	14	y	n	nonsevere	moderate	126	0	above average	7.25	5	16	0.9701	5	3	4	4	5	4	1	1	1	1	1	8	4	0	0	1	5	8	6	24	14.6298	3.6678	447.75	2
p432	patient	m	67	16	n	y	nonsevere	mild	150	1	below average	5.75	6	11	2.0292	4	4	4	7	4	4	1	1	1	1	0	3	4	0	0	1	3	3	6	17	51.7826	3.0022	397.362	12
p433	patient	f	65	12	n	n	nonsevere	mild	154	1	above average	5.75	3	11	1.645	5	4	6	5	6	4	1	1	1	1	1	5	4	0	1	1	4	3	5	18		2.766	547.894	2
p434	patient	m	65	12	n	n	nonsevere	mild	117	1	good	11.5	6	18	1.2834	5	4	7	7	7	1	1	1	1	1	1	4	4	1	2	1	5	9	6	28	285.985	3.6678	362.45	0
p435	patient	m	65	9	y	n	nonsevere	mild	155	2	average	12.25		17	1.4951																								2
p436	patient	m	73	16	n	n	severe	severe	14	0	above average	10	8	15	1.5435	5	7	7	7	4	4	1	1	1	1	1	8	3	1	2	1	5	8	5	25	306.585	2.2215	344.421	3
p437	patient	f	48	15	n	n	nonsevere	moderate	152	0	above average	13.5	7	17	1.5339	4	7	7	4	7	4	0	1	1	1	1	2	4	1	2	1	4	7	6	25	61.1116	1.6832	332.429	5
p438	patient	f	58	12	n	n	severe	severe	152	0	below average	13	5	16	0.9785	4	5	7	5	6	5	1	1	1	1	0	8	4	0	1	1	4	5	6	21	916.288	3.0022	424.898	5
p439	patient	f	34	16	n	n	nonsevere	moderate	123	0	average	12.5	6	16	2.2752	5	1	7	7	1	4	1	1	1	1	1	6	4	1	2	1	4	7	6	25	769.49	4.2561	410.343	7
p440	patient	m	56	12	n	n	nonsevere	mild	144	1	below average	14.5	7	17	2.0073	5	4	4	7	6	4	1	1	1	1	1	5	3	0	1	1	4	8	6	23		2.5631	465.3	3
p441	patient	f	58	15	n	n	severe	severe	124	1	below average	3.25	7	12	2.5776	5	1	3	6	4	5	1	1	1	1	1		1	1	1	1	3	7	6	20		2.3836	346.522	6
p442	patient	m	66	15	n	n	nonsevere	mild	141	1	average	6.75	7	15	0.9075	5	6	7	6	6	7	1	1	1	1	1	7	4	1	1	1	5	10	6	28	220.05	3.6678	428.093	4
p443	patient	m	69	12	n	n	nonsevere	mild	153	0	average	7.5	5	17	1.0741	5	3	4	6	5	5	1	1	1	1	1	8	3	1	1	1	5	8	6	25	2.8352	2.5631	358.636	13
p444	patient	f	63	12	n	n	nonsevere	moderate	153	1	average	12.25	10	16	0.7071	5	2	4	4	4	4	1	1	1	1	1	6	4	0	1	1	3	6	6	21	136.798	4.2561	449.593	1
p445	patient	f	57	12	n	n	nonsevere	mild	141	0	above average	15	8	18	2.3856	5	1	7	7	4	1	1	1	1	1	1	5	3	1	1	1	4	10	6	26	62.5319	4.2561	434.007	11
p446	patient	f	63	12	n	n	nonsevere	moderate	153	0	above average	5.5	5	16	1.7823	5	4	7	7	7	4	1	1	1	1	1	6	4	0	1	1	4	7	6	23	156.194	3.2897	473.864	4
p447	patient	m	64	16	n	n	nonsevere	moderate	152	1	average	15.5	6	9	1.3827	4	4	7	6	3	6	0	1	1	1	1	5									247.737	2.3836	371.429	12
p448	patient	f	50	9	n	n	nonsevere	moderate	144	1	average	9	7	14	1.1882												4	4	1	2	1	5	8	5	26	195.588	3.2897	450.468	18
p449	patient	f	62	12	n	n	nonsevere	moderate	155	0	good	13.25	4	16	1.259	5	3	7	7	5	4	1	1	1	1	1	7	4	1	0	1	2	7	6	21	-180.598	3.0022	427.556	0
p450	patient	f	61	9	n	n	nonsevere	mild	154	1	average	9	6	13	1.3198	5	1	7	7	7	7	1	1	1	1	1	5	3	0	0	1	4	4	6	18	816.812	2.2215	452.007	6
p451	patient	m	68	9	n	n	nonsevere	moderate	153	0	above average	15.25	8	16	1.8471	5	4	7	7	7	1	1	1	1	1	1	8	4	0	0	1	4	7	6	22	156.355	4.2561	506.271	1
p452	patient	m	69	12	y	y	severe	severe	151	0	poor	0	3.33	4.5		4	2	7	6	5	4	0	1	1	1	1	9	3	1	2	1	6	10	6	29	191.931	2.3836	414.95	8
p453	patient	m	64	15	n	n	nonsevere	moderate	153	0	average	6.5	6	16	1.8062	5	4	7			4	1	1	1	1	1	5	3	1	2	1	4	7	6	24	167.179	3.6678	511.734	0
p454	patient	m	38	16	n	n	severe	severe	115	0	average	7.5	5	16	1.5049	5	4	7	7	7	4	1	1	1	1	1	5	4	1	2	1	6	10	6	30	-50.9032	4.2561	333.7	1
p455	patient	m	39	17	n	n	severe	severe	149	0	above average	10.5	9	16	1.7489	5	4	4	4	4	4	1	1	1	1	1	6	4	1	2	1	5	9	6	28	140.956	3.2897	378.371	1
p456	patient	m	61	11	n	n	nonsevere	mild	153	1	above average	8.5	9	16	0.8726	5	4	4	4	4	4	1	1	1	1	1	6	4	1	2	1	5	8	6	27	23.6217	4.2561	443.229	3
p457	patient	f	56	12	n	n	nonsevere	mild	136	0	good	13.25	10	17	1.5435	4	4	7	7	7	7	0	1	1	1	1	7	4	1	1	1	5	9	6	27	394.238			0
p458	patient	m	54	16	n	n	nonsevere	mild	152	0	average	11	7	16	0.9583	4	4	6	5	4	6	1	1	1	0	1	7	4	0	1	1	3	9	6	24	154.446	3.2897	360.029	6
p459	patient	f	52	12	n	n	severe	severe	134	1	average	8.5	7	12	1.7648	5	1	7	7	7	4	1	1	1	1	1	0	4	1	1	1	2	4	6	19	209.011	3.6678	492.15	0
p460	patient	m	44	13	n	y	nonsevere	moderate	157	0	average	10.5	7	12	1.029	5	3	7	7	6	1	1	1	1	1	1	2	4	1	1	1	5	8	6	26	179.255	4.2561	358.443	1
p461	patient	m	70	9	n	n	nonsevere	moderate	152	2	average	10.5	8	15	1.4552	4	4	7	7	7	4	1	1	1	1	0	6	4	1	1	1	5	8	6	26	27.4459	2.766	372.536	4
p462	patient	m	43	12	n	n	nonsevere	moderate	148	0	average	7.75	9	18	2.1144	4	1	4	4	1	4	1	1	1	0	1	5	4	1	2	1	6	10	6	30	-9.5462	3.2897	471.525	0
p463	patient	f	63	13	n	n	severe	severe	145	0	average	11.75	9	17	1.5551	2	2	7	7	6	2	0	1	1	0	0	6	4	1	2	1	4	7	6	25	41.0448	1.0488	392.13	3
p464	patient	f	54	9	n	n	nonsevere	moderate	172	0	average	9	7	17	1.4552	5	1	4	4	7	7	1	1	1	1	1	9	4	1	1	1	6	10	6	29	394.325	3.2897	358.107	2
p465	patient	f	35	15	n	n	nonsevere	moderate	138	0	average	7.75	6	18	1.3827	5	4	6	6	6	5	1	1	1	1	1	4	3	1	2	1	5	10	4	26	510.322	1.4558	339.979	10
p466	patient	f	65	12	n	n	nonsevere	moderate	153	0	good	6	7	18	1.5435	5	4	4	7	4	4	1	1	1	1	1	3	4	1	0	1	2	6	5	19	3.5896	4.2561	427.101	1
p467	patient	f	58	12	n	n	nonsevere	moderate	172	0	average	5.75	7	16	1.9943	5	1	4	6	7	1	1	1	1	1	1	6	3	1	1	1	5	8	6	25	209.783	3.0022	403.229	11
p468	patient	f	57	12	n	n	nonsevere	moderate	144	2	average	2.75	3	15	2.1659	5	4	7	7	7	1	1	1	1	1	1	5	4	0	0	0	3	8	6	21	87.0348	1.567	382.581	12
p469	patient	f	66	12	n	n	severe	severe	113	1	poor	7.5	8	14	1.6139	5	1	7	4	7	4	1	1	1	1	1	5	4	1	1	1	3	9	6	25	312.875	2.766	453.914	5
c001	control	f	30	16	n	n	n/a	n/a	n/a	0	average	11.25	6	17	1.2783												4	4	0	2	1	6	10	5	28				1
c002	control	f	30	17	y	y	n/a	n/a	n/a	0	below average		8	14	2.1963	4	4	7	7	4	4	0	1	1	1	1	8	4	1	2	1	6	10	6	30	398.871	3.6678	378.593	0
c003	control	f	47	14	n	n	n/a	n/a	n/a	0	good	4.75	6	18	1.5894	5	5	4	5	5	5	1	1	1	1	1	6	4	1	2	1	6	10	6	30	30.2029	3.2897	392.821	0
c004	control	f	49	12	n	n	n/a	n/a	n/a	0	average	14.5	7	16	0.9634	5	5	5	5	5	4	1	1	1	1	1	4	4	1	2	1	5	8	6	27	308.866	3.0022	391.863	1
c005	control	f	42	15	n	n	n/a	n/a	n/a	0	good	6.5	6	18	1.6088	5	5	4	2	4	4	1	1	1	1	1	5	4	1	2	1	5	9	6	28	370.255	3.0022	361.243	2
c006	control	f	43	16	n	n	n/a	n/a	n/a	0	good	10	8	18	1.0981	5	2	6	7	3	6	1	1	1	1	1	6	4	1	1	1	5	10	6	28	57.0887	4.2561	389.879	2
c007	control	f	48	16	n	n	n/a	n/a	n/a	0	average	11.75	9	17	1.3048	5	4	7	1	6	7	1	1	1	1	1	9	4	1	1	1	5	7	6	25	65.5034	3.6678	436.957	0
c008	control	f	59	15	n	n	n/a	n/a	n/a	0	below average	18.5	8	16	1.2628	5	2	5	5	4	6	1	1	1	1	1	5	4	1	2	1	4	8	6	26	-103.41	3.2897	407.746	3
c009	control	f	52	17	n	n	n/a	n/a	n/a	0	good	14.5	8	18	1.645	5	7	7	7	7	7	1	1	1	1	1	7	4	1	2	1	4	7	6	25	374.693	2.766	350.729	2
c010	control	m	64	12	y	y	n/a	n/a	n/a	2	good	8.25	6	16	1.3827	4	4	4	7	7	7	0	1	1	1	1	5	3	1	2	1	5	8	5	25	135.302	3.2897	396.921	1
c011	control	f	41	17	n	n	n/a	n/a	n/a	0	good	14.5	10	18	1.8329	5	2	4	5	4	3	1	1	1	1	1	4	2	1	2	1	5	8	6	25	120.542	4.2561	373.357	1
c012	control	f	45	16	n	n	n/a	n/a	n/a	0	average	8	6	18	1.166	5	4	7	7	5	5	1	1	1	1	1	6	3	1	2	1	6	9	6	28	5.6429	3.2897	420.743	5
c013	control	m	69	6	n	n	n/a	n/a	n/a	1	poor	13.25	3	10	1.626																								5
c014	control	f	49	15	n	n	n/a	n/a	n/a	0	average	17.25	7	18	0.9785	5	7	6	7	6	7	1	1	1	1	1	7	4	1	2	1	5	8	6	27	271.454	4.2561	466.479	5
c015	control	m	43	14	n	n	n/a	n/a	n/a	0	average	10.5	7	15	1.7758	5	4	5	5	3	4	1	1	1	1	1	5	4	1	1	1	5	8	6	26	-5.4342	3.2897	500.014	5
c016	control	f	60	12	n	n	n/a	n/a	n/a	1	good	12.5	6	16	1.8726	5	2	4	5	4	4	1	1	1	1	1	7	4	1	1	1	6	9	6	28	105.902	4.2561	383.8	1
c017	control	f	50	15	n	n	n/a	n/a	n/a	0	above average	9.75	8	18	2.0934	5	1	7	4	4	7	1	1	1	1	1	5	4	1	2	0	4	10	6	27	110.305	4.2561	367.45	5
c018	control	f	49	15	n	n	n/a	n/a	n/a	0	average	9.75	5	14	0.7048	5	2	7	6	5	5	1	1	1	1	1	3	4	1	2	1	3	10	6	27	-78.7571	3.6678	340.421	7
c019	control	f	49	14	n	n	n/a	n/a	n/a	1	average	9.75	6	18	0.8556	4	2	7	7	4	4	1	1	1	1	0	3	4	1	2	1	5	10	6	29	187.61	3.0022	407.183	2
c020	control	f	29	16	n	n	n/a	n/a	n/a	0	above average	18	10	17	2.3983	5	6	7	7	6	3	1	1	1	1	1	5	4	1	2	1	5	6	6	25	82.4918	3.0022	311.157	0
c021	control	f	52	12	n	n	n/a	n/a	n/a	0	above average	9	6	16	1.4552	5	4	7	7	4	4	1	1	1	1	1	6	3	1	1	1	6	9	6	27	137.948	2.766	355.543	0
c022	control	f	52	15	n	y	n/a	n/a	n/a	1	average	6.5	6	18	0.7775	5	5	5	6	4	7	1	1	1	1	1	4	3	1	1	1	5	6	5	22		1.9348	401.007	14
c023	control	f	27	16	y	y	n/a	n/a	n/a	0	average	9.5	5	18	1.7424	5	3	6	6	3	5	1	1	1	1	1	5	4	1	2	1	6	10	6	30	127.351	2.0729	340.421	9
c024	control	f	52	15	n	n	n/a	n/a	n/a	0	average	12.5	8	17	0.9428	4	2	4	3	3	6	0	1	1	1	1	6	4	1	2	1	5	9	6	28	14.5002	4.2561	371.221	4
c025	control	f	28	16	n	n	n/a	n/a	n/a	0	good	9	7	16	2.2752	5	4	7	7	7	7	1	1	1	1	1	7	4	1	1	1	3	9	6	25	22.2406	4.2561	436.693	0
c026	control	f	47	15	n	n	n/a	n/a	n/a	0	good	11	9	17	1.855	5	1	7	7	1	4	1	1	1	1	1	7	4	1	2	1	6	8	6	28	123.358	4.2561	362.6	5
c027	control	f	57	16	n	n	n/a	n/a	n/a	0	average	15.25	8	18	1.1991	5	4	6	5	4	4	1	1	1	1	1	9	4	1	1	1	4	9	6	26	134.895	3.6678	481.636	6
c028	control	f	49	9	n	n	n/a	n/a	n/a	0	average	10.5	4	13	2.9951	4	7	1	7	1	7	1	1	1	1	0		4	0	0	1	3	4	5	17		4.2561	418.906	2
c029	control	f	52	11	n	n	n/a	n/a	n/a	0	average	18.5	6	17	1.3827	5	4	7	7	4	7	1	1	1	1	1	5	3	1	1	1	5	9	6	26	175.866	2.766	392.357	1
c030	control	m	30	12	y	n	n/a	n/a	n/a	0	good	12.5	9	15	1.6539	5	1	6	4	3	3	1	1	1	1	1	6	4	1	2	1	6	9	6	29	-5.1454	4.2561	444.229	0
c031	control	m	58	12	y	y	n/a	n/a	n/a	0	average	12.75	7	17	1.7235	5	1	7	7	7	4	1	1	1	1	1	5	4	1	2	1	5	10	6	29				0
c032	control	m	60	12	y	n	n/a	n/a	n/a	3	above average	12.75	7	17	1.3827	4	1	4	4	1	4	0	1	1	1	1	6	4	1	2	0	6	7	4	24	215.629	2.3836	418.856	5
c033	control	m	62	12	y	n	n/a	n/a	n/a	0	average	8.25	8	18	1.5435	5	4	7	7	7	1	1	1	1	1	1	7	4	1	2	1	4	7	6	25	6.9477	4.2561	445.714	2
c034	control	m	31	12	y	y	n/a	n/a	n/a	0	average	12.75	7	15	2.6346	5	7	7	7	7	7	1	1	1	1	1	8	4	1	2	1	6	8	6	28	65.9846	3.6678	397.443	0
c035	control	m	31	15	y	y	n/a	n/a	n/a	0	average	10.75	7	18	1.5339	5	7	7	7	7	7	1	1	1	1	1	6	4	1	2	1	6	10	6	30	142.005	2.766	373.094	0
c036	control	m	31	15	y	n	n/a	n/a	n/a	0	above average	12.75	9	18	1.8471	5	4	7	7	7	4	1	1	1	1	1	7	4	1	2	1	6	10	6	30	-27.6184	3.2897	418.683	0
c037	control	f	27	12	y	y	n/a	n/a	n/a	0	good	11.5	10	17	1.9166	5	6	7	7	4	5	1	1	1	1	1	6	3	1	2	1	6	8	6	27	41.3681	3.6678	440.412	1
c038	control	m	66	11	y	y	n/a	n/a	n/a	1	average	7.75	6	14	1.1376	5	5	7	7	4	4	1	1	1	1	1	4	3	1	2	1	4	8	5	24	56.1101	1.567	446.396	3
c039	control	m	58	9	y	y	n/a	n/a	n/a	0	average	13.75	8	14	0.5145	5	6	7	7	5	3	1	1	1	1	1	7	4	1	2	0	5	9	6	27	22.4186	3.6678	606.493	6
c040	control	f	56	9	n	n	n/a	n/a	n/a	0	average	10	7	17	1.9268	5	1	7	7	4	6	1	1	1	1	1	2	4	0	1	1	5	6	6	23	101.117	4.2561	416.843	0
c041	control	f	56	9	n	n	n/a	n/a	n/a	1	above average	7.5	8	16	2.0934	5	4	7	1	4	4	1	1	1	1	1	6	2	0	0	1	2	7	6	18	148.956	2.766	655.509	0
c042	control	f	77	12	n	n	n/a	n/a	n/a	0	good	12.25	7	17	1.1144	5	5	7	7	4	7	1	1	1	1	1	4	3	1	1	1	5	8	6	25	95.6875	4.2561	647.62	0
c043	control	m	56	9	n	n	n/a	n/a	n/a	0	average	10	6	11	1.4371	5	7	7	7	4	5	1	1	1	1	1	7	3	0	2	1	5	9	6	26	-9.5116	3.6678	425.187	8
c044	control	m	63	9	y	y	n/a	n/a	n/a	0	average	13.25	7	16	0	5	2	7	7	4	4	1	1	1	1	1	7	3	1	1	1	5	9	6	26	25.1			0
c045	control	f	62	12	n	n	n/a	n/a	n/a	1	good	8.5	6	15	1.2485	5	4	7	7		4	1	1	1	1	1	7	4	1	0	1	4	5	4	19	89.6237	3.6678	534.066	0
c046	control	m	62	12	y	n	n/a	n/a	n/a	1	good	14.5	8	17	2.2029																								0
c047	control	m	56	9	n	n	n/a	n/a	n/a	0	above average	12.5	9	16		5	7	7	7	7	7	1	1	1	1	1	8	4	1	1	1	5	10	6	28	89.3873	4.2561	530.407	0
c048	control	m	53	15	n	n	n/a	n/a	n/a	0	above average	15.25	8	17	1.5339	5	1	7	7	7	7	1	1	1	1	1	6	4	1	2	1	5	10	6	29	42.9535			0
c049	control	m	59	16	y	y	n/a	n/a	n/a	1	average	9.5	8	16	2.139	4	1	7	7	7	4	0	1	1	1	1	7	4	1	2	1	6	10	5	29	90.6495			0
c050	control	m	31	12	y	y	n/a	n/a	n/a	0	good	12.75	8	14	1.4608	5	6	4	7	4	4	1	1	1	1	1	9	3	1	2	1	6	9	6	28	155.806	0.86145	326.77	9
c051	control	f	28	15	n	y	n/a	n/a	n/a	0	average	15.25	7	16	1.3779	5	6	5	7	4	4	1	1	1	1	1	7	4	1	0	1	5	9	6	26	51.6809	3.6678	448.871	11
c052	control	m	61	9	n	n	n/a	n/a	n/a	1	average	8	4	17	0.8575	5	3	5	6	3	4	1	1	1	1	1	5	3	0	0	1	5	7	5	21	80.1727	3.6678	420.511	8
c053	control	f	59	12	n	n	n/a	n/a	n/a	1	good	9.5	7	16	1.4552	5	3	4	2	4	5	1	1	1	1	1		4	1	0	1	4	9	6	25	24.0785	2.5631	503.261	4
c054	control	f	57	9	n	n	n/a	n/a	n/a	0	good	9.75	7	14	1.5798	5	2		5	5	4	1	1	1	1	1		3	1	1	1	5	8	6	25	55.9872	1.8055	345.741	3
c055	control	f	30	12	y	y	n/a	n/a	n/a	0	average	12	8	16	1.2433	5	3	5	4	3	7	1	1	1	1	1	4	4	1	1	1	5	9	6	27	173.87	3.2897	370.821	5
c056	control	m	53	12	y	y	n/a	n/a	n/a	0	average	10	8	17	1.4061	5	6	5	2	4	4	1	1	1	1	1	4	4	1	0	1	5	10	6	27	-7.2989	4.2561	518.857	4
c057	control	m	68	12	y	y	n/a	n/a	n/a	0	average	9	8	12	1.195	5	5	7	7	6		1	1	1	1	1	7	4	1	2	1	4	6	6	24		2.2215	444.417	0
c058	control	f	57	9	y	y	n/a	n/a	n/a	1	above average	15.5	8	16	2.388	5	4	6	7	4	3	1	1	1	1	1	5	3	1	0	1	3	7	6	21	99.1548	2.2215	420.701	3
c059	control	f	59	12	n	n	n/a	n/a	n/a	0	good	14.5	5	15	1.4473	4	3	6	6	5	2	1	1	1	1	0	4	4	0	2	1	3	6	6	22	123.695	2.2215	472.797	1
c060	control	f	61	12	y	y	n/a	n/a	n/a	1	above average	17.5	4	9	1.819												5	3	1	2	1	4	10	6	27	35.9048	2.5631	384.486	4
c061	control	f	68	9	n	n	n/a	n/a	n/a	0	average	8	6	13	1.0556	4	1	4	4	5	5	1	1	1	1	0	8	4	1	0	1	3	8	6	23	-5.815	2.5631	650.617	0
c062	control	f	66	8	n	n	n/a	n/a	n/a	0	average	10.5	6	16	1.1827	5	1	6	5	6	4	1	1	1	1	1	7	3	1	2	1	4	8	6	25	234.411	2.5631	667.726	2
c063	control	m	65	9	n	y	n/a	n/a	n/a	0	average	9.25	7	14	1.029	5	1	6	5	4	5	1	1	1	1	1	7	3	1	1	1	4	8	6	24	16.4966	3.0022	574.055	0
c064	control	m	68	12	y	y	n/a	n/a	n/a	0	good	6.25	6	12	0.9701	4	5	4	4	4	6	1	1	1	0	1	1	4	1	0	1	5	8	6	25	88.6359	4.2561	538.59	1
c065	control	f	51	12	n	n	n/a	n/a	n/a	0	above average	7	7	17	2.1213	5	4	7	7	1	1	1	1	1	1	1	2	3	1	0	1	5	9	6	25	135.448	3.6678	356.819	5
c066	control	f	52	8	y	n	n/a	n/a	n/a	0	good	5.5	6	14	2.5725	4	7	4	1	7	4	0	1	1	1	1	8	3	0	1	1	4	9	6	24	-80.6486	3.6678	383.807	3
c067	control	m	70	12	y	n	n/a	n/a	n/a	0	good	11.5	6	14	1.0922	5	5	7	5	4	6	1	1	1	1	1	5	4	1	1	1	4	5	5	21	94.2666	2.0729	431.671	0
c068	control	f	63	9	n	y	n/a	n/a	n/a	1	average	11.5	6	11	1.3346	4	7	4	4	4	2	1	1	1	0	1	8	4	0	0	1	3	9	6	23	-54.6238	3.2897	422.934	9
c069	control	m	60	12	n	n	n/a	n/a	n/a	1	above average	5	8	12	1.638																								5
c070	control	m	66	9	y	n	n/a	n/a	n/a	0	above average	6.25	6	14	0	2	4	4	1	4	4	0	1	0	0	1	9	3	0	0	1	2	5	5	16	-317.353	3.2897	472.3	2
c071	control	f	59	12	n	n	n/a	n/a	n/a	0	average	6.75	7	16	0.9164	4	4	7	6	5	7	1	1	1	0	1	8	4	0	1	1	5	7	6	24	173.257	3.0022	600.804	8
c072	control	f	65	9	n	n	n/a	n/a	n/a	1	average	6	6	13	1.166	4	7	7	4	7	4	1	1	1	1	0	2	1	0	0	1	2	7	6	17		3.0022	481.943	12
c073	control	m	65	12	n	y	n/a	n/a	n/a	1	average	10.25	6	16	0.8269	5	3	5	3	3	2	1	1	1	1	1	9	4	1	1	1	5	6	6	24	311.764	2.0729	422.479	5
c074	control	m	69	16	y	y	n/a	n/a	n/a	2	average	20	6	15	1.4874	4	4	5	6	5	4	1	1	1	0	1	7	4	1	1	1	4	9	6	26	-37.7198	1.8055	414.632	4
c075	control	m	64	12	y	n	n/a	n/a	n/a	2	poor	7.25	4	4	1.2464																								7
c076	control	f	64	9	n	n	n/a	n/a	n/a	0	above average	6.75	8	10	1.6247	5	4	5	7	5	7	1	1	1	1	1	7	2	0	0	1	3	6	6	18	144.882	2.3836	383.209	1
c077	control	f	50	9	n	n	n/a	n/a	n/a	1	above average	17.75	7	14	1.6529	3	4	4	7	7	7	0	1	1	1	0		2	0	1	1	4	4	6	18		2.0729	355.252	9
c078	control	f	63	11	n	n	n/a	n/a	n/a	1	average	10.5	2	14	1.1376	5	5	5	6	2	4	1	1	1	1	1	5	3	1	0	1	4	10	5	24	227.9	1.9348	400.964	9
c079	control	f	61	9	n	n	n/a	n/a	n/a	1	above average	7.25	5	17	1.0603	4	2	6	6	6	4	1	1	1	1	0	6	2	1	0	1	2	9	5	20	618.523	2.5631	505.165	4
c080	control	f	61	12	y	n	n/a	n/a	n/a	0	above average	14.5	9	16	1.7573	5	3	4	6	4	4	1	1	1	1	1	8	4	0	2	1	4	7	5	23	39.3494	0.25132	288.394	0
c081	control	f	64	6	y	y	n/a	n/a	n/a	2	above average	14.25	3	15	1.3284	5	2	7	7	4	4	1	1	1	1	1	10	2	0	0	1	3	3	5	14				2
c082	control	m	70	9	y	y	n/a	n/a	n/a	1	average	6.5	7	13	1.2834	5	2	5	2	4	5	1	1	1	1	1	3	4	1	0	0	4	9	6	24	66.3682	3.2897	587.237	4
c083	control	f	70	3	n	n	n/a	n/a	n/a	1	average	6.75	10	14	1.3198	5	3	4	7	3	4	1	1	1	1	1	6	3	1	0	1	6	5	5	21	142.925	1.8055	413.186	8
c084	control	m	68	12	n	n	n/a	n/a	n/a	1	average	12.5	7			5	1	6	5	5	4	1	1	1	1	1	6	4	1	1	1	5	8	6	26	121.796	3.2897	686.695	0
c085	control	m	30	15	y	n	n/a	n/a	n/a	0	above average	12.75	10	18	2.1761	5	4	4	7	4	4	1	1	1	1	1	7	3	1	1	1	6	8	6	26	50.6576	2.766	300.25	2
c086	control	m	27	9	y	y	n/a	n/a	n/a	0	average	9	9	18	2.058	4		7	4	7	4	0	1	1	1	1	4	2	0	2	1	6	7	6	24	12.55	2.5631	399.374	4
c087	control	m	31	15	n	y	n/a	n/a	n/a	0	average	14.5	8	17	1.7235	5	4	4	7	4	4	1	1	1	1	1	6	3	0	1	1	4	7	6	22	35.9429	4.2561	497.813	4
c088	control	m	36	15	y	y	n/a	n/a	n/a	1	below average	15.25	6	16	1.3235	4	3	5	4	2	5	1	1	1	0	1	5	4	1	2	1	6	10	5	29	-33.4209	2.2215	346.336	10
c089	control	f	50	8	n	n	n/a	n/a	n/a	0	good	20	8	18	1.855	5	6	7	7	3	4	1	1	1	1	1	8	3	1	1	1	6	9	6	27	113.382	2.5631	374.814	2
c090	control	f	47	5	n	n	n/a	n/a	n/a	0	average	11.5	7	16	2.3214	4	5	3	4	7	6	1	0	1	1	1	6	1	1	1	1	4	6	6	20	-62.4791	4.2561	445.793	1
c091	control	f	54	9	n	y	n/a	n/a	n/a	0	above average	17	5	16	1.4552	5	7	7	7	7	7	1	1	1	1	1	4	2	1	1	1	5	8	6	24	87.5384	4.2561	441.786	0
c092	control	f	62	9	n	n	n/a	n/a	n/a	0	good	7.75	7	16	1.896	5	5	7	7	7	7	1	1	1	1	1	7	2	1	1	1	3	7	6	21	-97.4716	4.2561	695.379	0
c093	control	f	57	2	n	n	n/a	n/a	n/a	0	poor	7.5	2	15	2.1269	5	1	7	6	6	7	1	1	1	1	1	5	1	0	0	1	3	7	6	18	-13.2684	4.2561	462.193	1
c094	control	f	54	5	n	n	n/a	n/a	n/a	0	average	7	6	16	1.6499	5	1	7	7	3	3	1	1	1	1	1	7	1	1	0	1	3	6	6	18	294.469	3.2897	420.862	1
c095	control	m	56	8	n	y	n/a	n/a	n/a	0	average	11	8	17	1.715	5	1	6	7	4	1	1	1	1	1	1	6	3	1	2	1	5	9	6	27	249.799	3.6678	406.486	0
c096	control	m	26	9	y	y	n/a	n/a	n/a	0	above average	15.5	9	17	0.9963	5						1	1	1	1	1	7	4	1	1	1	6	10	6	29	141.17	4.2561	590.372	0
c097	control	f	46	15	n	n	n/a	n/a	n/a	0	average	4.5	8	18	1.8471	5	4	4	7	4	7	1	1	1	1	1	4	4	1	2	1	6	9	6	29	-25.4517	3.6678	411.557	2
c098	control	m	47	12	y	n	n/a	n/a	n/a	0	average	4	5	15	1.4951	5	2	6	5	2	2	1	1	1	1	1	6	4	1	2	1	5	9	6	28	170.704	3.6678	475.114	7
c099	control	m	56	10	y	y	n/a	n/a	n/a	0	average	3.75	8	17	1.3921	4	7	7	7	5	6	1	1	1	0	1	5	4	1	0	1	4	5	6	21	-20.7631	4.2561	473.15	1
c100	control	f	41	15	n	n	n/a	n/a	n/a	0	average	11.5	9	18	1.2367	5	4	4	7	3	4	1	1	1	1	1	6	4	1	1	1	5	8	6	26	-90.7547	2.766	345.229	0
c101	control	f	34	16	n	n	n/a	n/a	n/a	0	average	10.25	9	17	1.5049	5	7	7	7	6	7	1	1	1	1	1	6	4	1	1	1	6	8	6	27	144.489	4.2561	327.664	4
c102	control	f	64	9	n	n	n/a	n/a	n/a	0	average	13.5	3	13	0.7071	3	7	7	7	7	7	1	1	0	1	0	8	2	0	0	1	4	5	5	17		1.2459	406.168	0
c103	control	f	58	12	n	n	n/a	n/a	n/a	0	average	11.5	8	17	2.1213	5	4	4	4	7	4	1	1	1	1	1	4	3	1	1	1	5	9	6	26	-35.7174	1.567	335.521	3
c104	control	m	39	16	n	n	n/a	n/a	n/a	0	below average	6.75	9	18	0.7775	4	3	3	2	3	3	1	1	1	1	0	7	4	1	2	1	6	10	6	30	25.4681	4.2561	410.971	5
c105	control	m	25	16	n	n	n/a	n/a	n/a	0	average	17.7	9	17	1.8087	4	5	6	7	4	4	1	1	1	1	0	5	4	1	2	1	6	8	6	28	32.7815	3.6678	331.064	7
c106	control	f	42	15	n	n	n/a	n/a	n/a	0	average	9.25	6	17	0.9785	5	6	7	7	7	4	1	1	1	1	1	6	4	1	0	1	6	7	6	25	27.2142	4.2561	493.043	0
c107	control	f	33	15	y	n	n/a	n/a	n/a	0	above average	11.25	9	18	1.7226	5	5	7	7	7	7	1	1	1	1	1	3	4	1	2	1	6	9	6	29	97.9417	2.0729	319.223	0
c108	control	f	42	16	n	n	n/a	n/a	n/a	0	average	10.25	8	18	1.5925	4	5	7	4	4	1	1	1	1	1	0	9	3	1	1	1	6	9	6	27	-98.9104	4.2561	436.136	0
c109	control	f	39	16	n	n	n/a	n/a	n/a	0	average	11.5	5	18	1.3086	5	6	6	7	5	6	1	1	1	1	1	3	4	1	2	1	6	10	6	30	127.434	3.2897	337.486	7
c110	control	m	57	15	n	y	n/a	n/a	n/a	0	average	10.5	5	18	1.1376	5	5	6	6	5	5	1	1	1	1	1	7	4	1	2	1	5	9	6	28	118.696	3.0022	482.676	2
c111	control	f	32	16	n	n	n/a	n/a	n/a	0	above average	11.25	9	17	1.855	5	7	7	7	7	4	1	1	1	1	1	7	4	1	2	1	6	9	6	29	-65.2635	2.766	340.886	1
c112	control	f	36	16	n	n	n/a	n/a	n/a	0	average	9.5	6	17	1.7235	5	4	5	7	4	4	1	1	1	1	1	5	4	1	2	1	5	9	6	28	49.9854	3.6678	345.064	4
c113	control	f	50	14	n	n	n/a	n/a	n/a	0	below average	8	7	18	1.2834	5	2				7	1	1	1	1	1	8	4	1	2	1	6	8	6	28	313.222	3.0022	341.014	1
c114	control	f	41	15	n	n	n/a	n/a	n/a	0	good	6.75	8	18	1.8302	5	4	6	4	4	6	1	1	1	1	1	5	4	1	1	1	6	7	6	26	26.9931	3.2897	350.2	6
c115	control	f	45	15	n	n	n/a	n/a	n/a	0	average	9.75	5	16	1.645	5	7	7	4	1	1	1	1	1	1	1	5	4	1	2	1	6	8	6	28	232.274	3.6678	382.571	6
c116	control	f	30	15	n	n	n/a	n/a	n/a	0	average	13.75	9	18	0.9984	5	5	6	7	6	6	1	1	1	1	1	5	4	1	1	1	5	10	6	28	96.6179	3.6678	296.464	4
c117	control	f	39	16	n	n	n/a	n/a	n/a	0	above average	10	9	18	1.2628	5	7	7	7	1	4	1	1	1	1	1	9	4	1	2	1	5	9	6	28	-1.4764	2.0729	340.45	5
c118	control	m	58	15	n	n	n/a	n/a	n/a	0	average	6.25	5	15	0.7048	4	5	6	5	6	5	1	1	1	0	1	7	4	1	2	1	5	6	6	25	109.901	4.2561	613.194	0
c119	control	f	49	11	y	n	n/a	n/a	n/a	0	average	8.5	10	18	0.7071	4	4	7	4	4	4	1	1	1	1	0		3	1	2	1	4	10	6	27	43.4468	4.2561	398.261	4
c120	control	f	55	14	n	n	n/a	n/a	n/a	0	good	10	6	17	0.8575	5	7	6	7	4	6	1	1	1	1	1	6	4	1	1	1	3	8	6	24	109.431	2.766	473.543	1
c121	control	m	41	12	y	y	n/a	n/a	n/a	0	average	9	6	15	1.8231	5	7	7	7	4	4	1	1	1	1	1	8	4	1	1	1	4	7	6	24	76.6823	3.6678	394.629	0
c122	control	m	41	16	n	n	n/a	n/a	n/a	0	above average	15.25	7	17	1.2628	5	5	7	4	5	7	1	1	1	1	1	4	4	1	2	1	5	10	6	29	19.2128	4.2561	356.214	0
c123	control	m	43	9	n	n	n/a	n/a	n/a	0	above average	19.5	7	17	1.2485	5	4	7	4	4	4	1	1	1	1	1	7	4	1	1	1	5	10	6	28	289.408	3.6678	380.87	1
c124	control	f	27	9	y	y	n/a	n/a	n/a	0	average	8.5	6	17	1.5925	4	4	4	7	4	4	1	1	1	0	1	7	4	1	1	1	4	4	6	21	125.988	3.6678	423.364	2
c125	control	f	56	19	n	n	n/a	n/a	n/a	0	average	14.5	9	18	1.537	5	4	4	7	4	4	1	1	1	1	1	3	4	1	2	1	5	8	6	27	-225.855	3.6678	334.929	6
c126	control	f	41	12	n	n	n/a	n/a	n/a	0	good	19	7	15	1.4778	5	7	7	7	7	4	1	1	1	1	1	6	3	0	1	1	5	5	6	21	148.011	2.766	413.393	0
c127	control	f	71	11	n	n	n/a	n/a	n/a	0	above average	6.25	6	16	0.9701	5	4	7	4	4	1	1	1	1	1	1	5	4	0	1	1	3	10	6	25	424.851	1.8055	402.267	0
c128	control	f	53	13	n	n	n/a	n/a	n/a	0	above average	10.75	4	16	1.3956	5	7	7	7	7	4	1	1	1	1	1	6	4	1	2	1	5	8	6	27	208.784	3.2897	367.079	0
c129	control	f	41	12	n	n	n/a	n/a	n/a	0	average	11.5	10	18	1.5435	5	3	5	5	5	5	1	1	1	1	1	6	4	1	1	1	5	9	6	27	-101.483	3.2897	409.121	0
c130	control	f	44	8	n	y	n/a	n/a	n/a	0	average	7.75	6	16	2.1144	5	4	7	7	4	4	1	1	1	1	1	8	2	1	2	1	4	5	6	21		4.2561	543.239	17
c131	control	m	65	12	y	n	n/a	n/a	n/a	0	average	9.5	6	15	1.2274	5	5	6	6	7	5	1	1	1	1	1	6	4	1	1	1	4	10	6	27	473.425	1.8055	430.829	7
c132	control	f	41	16	n	n	n/a	n/a	n/a	0	average	11.5	9	18	1.8471	4	7	4	7	4	4	1	1	1	1	0	7	4	1	2	1	6	9	6	29	-48.5319	3.6678	459.75	0
c133	control	m	53	11	y	n	n/a	n/a	n/a	0	average	16.25	2	13	1.0432	3	6	5	7	3	4	0	1	1	1	0	6	4	1	1	1	6	7	6	26	3.5178	3.6678	632.551	3
c134	control	f	54	9	n	n	n/a	n/a	n/a	0	average	11																4	0	2	0	5	5	5	21				5
c135	control	f	50	8	n	n	n/a	n/a	n/a	0	average	16.5																											25
c136	control	f	30	15	n	n	n/a	n/a	n/a	0	average	13.25	9	16	2.1213	5	7	7	7	7	4	1	1	1	1	1	6	4	1	2	1	5	9	6	28	-50.2197	4.2561	404.021	5
c137	control	m	26	15	y	n	n/a	n/a	n/a	0	above average	14.75	10	17	1.5136	5	7	7	7	7	7	1	1	1	1	1	9	4	1	2	1	5	9	6	28	58.8788	4.2561	354.2	6
c138	control	f	54	9	n	n	n/a	n/a	n/a	0	good	16.25	5	16	1.2897	5	4	7	5	4	6	1	1	1	1	1	4	3	0	1	1	3	6	6	20	180.722	1.9348	395.836	4
c139	control	f	41	15	n	n	n/a	n/a	n/a	0	average	9	5	17	2.0332	5	4	6	7	5	6	1	1	1	1	1	6	4	1	2	1	6	8	6	28	36.6219	3.6678	483.171	9
c140	control	m	76	15	n	n	n/a	n/a	n/a	2	average	2.75	6	13	1.0741	5	4	6	2	4	5	1	1	1	1	1	3	4	1	1	1	4	6	5	22		2.3836	524.515	8
c141	control	m	34	13	n	n	n/a	n/a	n/a	0	below average	6.75	7	14	1.8542	5	1	4	7	5	2	1	1	1	1	1	9	4	1	1	1	4	9	6	26	87.7391	1.0488	307.114	2
c142	control	f	67	12	n	n	n/a	n/a	n/a	1	good	9.75	8	17	1.4552	5	4	6	4	5	2	1	1	1	1	1	6	4	1	1	1	4	9	6	26	281.305	3.2897	485.594	2
c143	control	m	33	12	y	y	n/a	n/a	n/a	0	average	4.5	7	17	1.0369	4	2	4	4	4	2	1	1	1	1	0	8	3	1	1	1	4	7	6	23	146.711	2.5631	313.229	8
c144	control	m	74	12	y	y	n/a	n/a	n/a	0	above average	10.25	6	15	1.6179	4	6	4	4	4	7	1	1	1	1	0	8	3	0	1	1	5	7	6	23		1.9348	492.821	1
c145	control	f	55	9	n	n	n/a	n/a	n/a	1	average	14.25	8	13	1.8028	5	6	3	1	4	4	1	1	1	1	1	7	4	1	1	1	3	9	6	25	59.0652	3.6678	340.607	1
c146	control	f	38	12	y	y	n/a	n/a	n/a	0	good	11	9	17	2.4254	5	4	4	7	7	4	1	1	1	1	1	8	4	1	1	1	5	9	6	27	85.4605	3.2897	296.114	4
c147	control	m	55	12	y	y	n/a	n/a	n/a	0	average	9	4	17	1.8471	5	4	4	4	7	1	1	1	1	1	1	5	4	1	0	1	5	5	6	22	69.0037	3.2897	362.271	1
c148	control	m	55	9	y	y	n/a	n/a	n/a	0	good	10.5	3	14	1.0247	4	4	4	7	4	4	1	1	1	1	0	8	3	0	1	1	6	4	6	21	60.7286	3.6678	483.514	9
c149	control	m	71	9	y	n	n/a	n/a	n/a	1	average	4	6	13	2.5725	5	4	7	7	4	1	1	1	1	1	1	2	4	1	2	1	6	10	6	30	138.378	2.766	418.652	1
c150	control	f	69	4	n	n	n/a	n/a	n/a	0	above average	10	8	16	1.7235	5	4	5	6	6	6	1	1	1	1	1	6	4	0	0	0	4	4	6	18		1.6832	396.022	5
c151	control	f	64	12	n	n	n/a	n/a	n/a	1	average	17.25	7	14	2.5718	5	7	4	7	4	2	1	1	1	1	1	6	4	0	2	1	4	8	6	25	-34.3108	2.0729	589.615	5
c152	control	m	68	9	y	n	n/a	n/a	n/a	1	average	9	9	14	1.5339	5	4	4	4	4	4	1	1	1	1	1	5	4	1	0	1	4	7	6	23	95.1105	3.0022	367.314	5
c153	control	f	51	12	n	n	n/a	n/a	n/a	1	below average	10	5	17	2.0163	5	6	5	6	5	5	1	1	1	1	1	4	3	1	1	1	3	8	6	23	316.438	1.4558	340.514	9
c154	control	m	29	15	n	n	n/a	n/a	n/a	0	average	17.25	8	16	1.5392	5	5	6	7	7	5	1	1	1	1	1	8	4	1	2	1	5	9	6	28	-10.1587	4.2561	341.9	0
c155	control	f	53	7	n	n	n/a	n/a	n/a	0	average	5.75	7	13	1.8787	4	7	7	7	7	1	1	1	1	1	0	6	3	1	0	1	4	6	5	20	-89.0408	4.2561	465.136	13
c156	control	f	33	11	y	y	n/a	n/a	n/a	0	above average	6.5	4	15	2.0934	5	6	7	7	7	5	1	1	1	1	1	6	3	1	0	1	3	10	6	24	18.776	4.2561	406.029	6
c157	control	m	30	15	y	y	n/a	n/a	n/a	0	good	9.25	9	17	2.2353	5	3	4	4	4	5	1	1	1	1	1	5	3	1	1	0	5	7	6	23	-61.9637	4.2561	403.907	0
c158	control	f	67	9	n	n	n/a	n/a	n/a	1	average	10	3	15	1.855	5	4	4	4	4	4	1	1	1	1	1	4	3	0	0	1	3	8	5	20	473.535	2.766	314.826	0
c159	control	f	29	10	y	y	n/a	n/a	n/a	0	good	5.25	5	14	1.5424	5	7	5	7	4	5	1	1	1	1	1	5	4	1	1	1	5	7	6	25	-13.3131	3.0022	312.014	4
c160	control	f	62	10	n	n	n/a	n/a	n/a	0	average	9	6	15	2.0073	5	7	7	7	7	7	1	1	1	1	1	8	2	0	0	0	3	5	5	15	173.845	2.5631	463.412	11
c161	control	f	61	9	y	y	n/a	n/a	n/a	3	below average	17.75	6	15	1.1504	5	4	5	1	2	5	1	1	1	1	1	6	4	1	0	1	5	8	6	25	201.979	2.2215	344.784	10
c162	control	f	59	12	n	n	n/a	n/a	n/a	0	above average	5.5	5	15	1.1376	5	6	7	7	7	7	1	1	1	1	1	6	2	1	1	1	3	5	6	19	217.023	4.2561	626.143	0
c163	control	m	28	17	y	y	n/a	n/a	n/a	0	above average	13.5	8	18	1.4775	5	1	4	7	1	6	1	1	1	1	1	7	4	1	2	1	5	8	5	26	19.2417	3.0022	308.729	3
c164	control	f	30	16	n	n	n/a	n/a	n/a	0	good	15.25	8	18	2.0651	5	3	2	5	5	4	1	1	1	1	1	3	4	1	1	1	6	9	6	28	287.458	3.0022	366.786	0
c165	control	f	25	16	n	n	n/a	n/a	n/a	0	average	14.75	7	16	1.7235	5	7	7	7	6	7	1	1	1	1	1	7	4	1	2	1	6	10	6	30	11.0357	3.0022	349.329	3
c166	control	f	53	2	n	n	n/a	n/a	n/a	0	average	10	8	13	2.1144	4	4	4	7	4	1	1	1	1	1	0		0	0	0	1	4	7	5	17	98.8498	4.2561	436.443	14
c167	control	m	35	19	n	n	n/a	n/a	n/a	0	above average	13.5	5	18	1.5435	5	6	5	7	5	4	1	1	1	1	1	9	4	1	2	1	5	8	6	27	-39.4353	4.2561	349.336	9
c168	control	f	48	12	n	y	n/a	n/a	n/a	0	average	12.25	7	17	1.5435	5	4	7	7	4	4	1	1	1	1	1	7	4	1	2	1	4	10	6	28	-70.5208	3.2897	319.137	0
c169	control	f	57	12	n	n	n/a	n/a	n/a	0	above average	12	6	18	2.1144	5	1	4	7	7	4	1	1	1	1	1	3	4	1	1	1	4	10	6	27	-104.8	2.5631	345.421	3
c170	control	m	79	16	n	n	n/a	n/a	n/a	0	average	8.25	8	17	1.1504	5	1	7	7	7	1	1	1	1	1	1	6	4	1	2	1	4	8	6	26	215.495	4.2561	461.396	0
c171	control	m	31	16	n	n	n/a	n/a	n/a	0	average	13	5	13	1.3048	5	6	6	6	3	6	1	1	1	1	1	4	4	1	2	1	5	8	6	27	118.16	3.0022	385.748	12
c172	control	f	51	11	n	n	n/a	n/a	n/a	0	good	9	5	17	1.4476	5	4	7	7	7	7	1	1	1	1	1	7	4	1	2	1	6	6	6	26	1.2738	4.2561	395.029	4
c173	control	f	53	14	n	n	n/a	n/a	n/a	0	above average	7	8	18	1.7226	5	7	7	7	7	7	1	1	1	1	1	7	4	1	2	1	3	9	6	26	122.614	4.2561	472.264	7
c174	control	f	66	12	n	n	n/a	n/a	n/a	1	good	4.25	7	16	1.5339	5	4	7	4	7	1	1	1	1	1	1	7	4	1	1	1	4	7	6	24	97.264	4.2561	542.971	2
c175	control	f	54	14	n	n	n/a	n/a	n/a	0	good	12.75	9	17	1.8436	5	2	5	7	5	6	1	1	1	1	1	8	2	1	2	1	4	9	6	25	209.22	3.0022	394.892	4
c176	control	m	71	9	n	n	n/a	n/a	n/a	0	average	10	7	17	1.6017	4	4	6	3	4	6	1	1	1	0	1	7	4	0	1	1	4	6	6	22	149.147	3.0022	417.348	1
c177	control	m	75	12	y	n	n/a	n/a	n/a	0	above average	10.75	9	10	1.2897	5	2	5	5	2	3	1	1	1	1	1	5	2	1	2	0	4	7	6	22	172.966	1.9348	415.386	2
c178	control	f	53	12	n	n	n/a	n/a	n/a	0	above average	10.5	6	18	2.0292	5	4	4	4	7	4	1	1	1	1	1	3	3	1	1	1	4	8	6	24	170.771	3.6678	383.543	5
c179	control	m	73	12	n	n	n/a	n/a	n/a	0	average	7.75	7	13	1.3956	4	5	5	7	7	3	1	1	1	1	0	2	4	1	2	1	4	5	6	23	-1.5555	1.6832	340.45	0
c180	control	m	69	9	y	n	n/a	n/a	n/a	0	average	9.5	5	9	1.2834	5	7	5	6	4	4	1	1	1	1	1	5	2	0	0	1	4	7	6	20	-3.2889	3.0022	383.174	4
c181	control	f	26	19	n	n	n/a	n/a	n/a	0	average	8.75	5	18	1.6047	5	3	6	5	6	5	1	1	1	1	1	7	4	1	2	1	5	7	4	24	286.833	3.0022	314.679	23
c182	control	f	31	9	y	y	n/a	n/a	n/a	0	above average	10.5	6	17	1.855	5	4	4	4	4	4	1	1	1	1	1	8	3	0	1	1	4	7	6	22	137.381	2.2215	318.7	6
c183	control	f	36	9	y	y	n/a	n/a	n/a	0	average	11.75	8	14	1.0247	4	5	4	7	4	4	1	1	1	0	1	6	3	0	1	1	5	9	6	25	10.1357	3.0022	427.293	11
c184	control	f	58	15	n	n	n/a	n/a	n/a	0	good	14.5	8	17	1.2367	5	6	6	5	5	4	1	1	1	1	1	9	4	1	2	1	4	9	6	27	21.4458	2.0729	424.655	0
c185	control	f	70	12	n	n	n/a	n/a	n/a	0	good	8.25	3	17	0.8948	5	3	6	6	5	5	1	1	1	1	1	5	4	0	0	1	5	8	6	24	128.068	2.0729	399.393	0
c186	control	m	62	10	y	y	n/a	n/a	n/a	0	average	12	3	15	1.7978	5	3	7	4	6	3	1	1	1	1	1	4	4	0	0	1	4	5	6	20	257.741	1.349	367.771	2
c187	control	m	67	9	n	n	n/a	n/a	n/a	1	above average	5.75	7	17	1.8231	4	4	7	4	7	1	1	1	1	1	0	8	4	1	0	1	5	5	6	22	139.175	1.0488	412.109	5
c188	control	f	46	12	n	n	n/a	n/a	n/a	0	average	14.25	8	16	2.4608	5	7	4	7	4	4	1	1	1	1	1	3	2	1	2	1	2	10	6	24	31.7451	4.2561	440.849	11
c189	control	f	63	11	n	n	n/a	n/a	n/a	0	good	9.25	5	16	2.4793	5	4	7	4	7	4	1	1	1	1	1	3	3	0	0	1	3	7	6	20	86.3154	1.6832	387.496	10
c190	control	f	68	9	n	n	n/a	n/a	n/a	0	good	9.75	6	16	1.6539	5	6	7	7	7	6	1	1	1	1	1	5	4	1	1	1	4	9	6	26	-42.5524	3.0022	402.421	0
c191	control	f	50	12	n	n	n/a	n/a	n/a	0	above average	11.75	5	17	1.2154	5	3	5	5	6	5	1	1	1	1	1	8	3	1	2	1	4	10	6	27	83.8622	3.6678	505.957	1
c192	control	m	18	11	y	y	n/a	n/a	n/a	0	good	6.5	8	14	2.1144	5	4	7	7	3	5	1	1	1	1	1	5	4	1	1	1	5	7	6	25	122.116	1.8055	329.221	8
c193	control	m	60	11	n	n	n/a	n/a	n/a	0	average	16	8	18	1.2935	5						1	1	1	1	1		3	1	2	1	6	6	6	25	232.184	2.5631	437.621	5
c194	control	f	41	16	n	n	n/a	n/a	n/a	0	above average	6.5	7	18	1.3956	5	6	4	7	6	4	1	1	1	1	1	7	4	1	0	1	4	9	6	25	-77.4723	3.6678	391.064	1
c195	control	m	70	15	n	y	n/a	n/a	n/a	0	poor	12.5	1	15	1.1318	5	4	4	4	4	4	1	1	1	1	1	5	4	1	2	1	5	7	6	26	199.998	3.0022	541.421	9
c196	control	f	49	12	n	n	n/a	n/a	n/a	0	above average	8	6	18	2.058	5	1	4	1	1	1	1	1	1	1	1	6	4	1	2	1	5	6	6	25	66.668	1.9348	388.064	3
c197	control	m	56	13	n	n	n/a	n/a	n/a	0	above average	11	4	17	1.3284													4	0	1	1	4	7	6	23				2
c198	control	f	55	12	n	n	n/a	n/a	n/a	0	good	12.25	8	18	1.2154	5	3	7	3	7	7	1	1	1	1	1	4	3	1	0	1	5	8	6	24	-13.1676	2.0729	318.821	4
c199	control	m	58	15	n	n	n/a	n/a	n/a	0	above average	16.25	7	18	1.6179	5	2	5	1	4	2	1	1	1	1	1	7	3	1	2	1	4	5	6	22	-2.2644	3.6678	416.136	1
c200	control	f	66	8	n	n	n/a	n/a	n/a	0	above average	8	8	18	0	5	7	7	7	7	7	1	1	1	1	1	8	4	1	1	1	5	9	6	27	37.9384	2.5631	351.621	0
c201	control	m	29	15	n	y	n/a	n/a	n/a	0	above average	9.5	8	18	1.3235	5	4	5	6	5	5	1	1	1	1	1	4	4	1	1	1	6	8	6	27	206.905	3.2897	357.107	0
c202	control	f	42	12	n	n	n/a	n/a	n/a	0	good	18.5	2	16	2.1057	5	7	4	7	7	4	1	1	1	1	1		3	1	1	1	4	8	6	24	353.133	3.0022	383.036	3
c203	control	f	57	12	n	n	n/a	n/a	n/a	0	average	6.75	4	15	1.3827	5	4	4	4	4	4	1	1	1	1	1	5	4	0	0	1	4	6	6	21		1.0488	452.26	1
c204	control	f	39	16	n	n	n/a	n/a	n/a	0	above average	17.75	6	18	1.2005	5	7	6	7	5	4	1	1	1	1	1	8	4	1	2	1	6	8	6	28	209.412	3.6678	340.671	0
c205	control	f	65	9	n	n	n/a	n/a	n/a	0	above average	9.25	7	18	1.9403	4	4	4	7	4	5	1	1	0	1	1	7	3	1	1	1	5	9	6	26	167.274	3.2897	392.453	3
c206	control	f	64	12	n	n	n/a	n/a	n/a	0	below average	3.5	6	16	1.6017	5	5	5	7	7	3	1	1	1	1	1	9	3	1	2	1	5	6	6	24	268.479	4.2561	426.743	4
c207	control	f	45	9	n	n	n/a	n/a	n/a	0	average	6.5	7	16	2.2752	5	4	7	4	4	7	1	1	1	1	1	6	4	0	1	1	6	10	6	28	188.022	3.2897	389.921	11
c208	control	m	45	9	y	y	n/a	n/a	n/a	0	average	15	8	15	1.626	4	3	7	7	2	3	1	1	1	1	0	7	3	1	1	1	5	9	6	26	31.2498	3.2897	315.507	2
c209	control	f	50	15	n	n	n/a	n/a	n/a	0	above average	9	9	16	1.645	5	4	7	4	7	7	1	1	1	1	1	6	4	1	1	1	6	9	5	27	89.5149	3.2897	369.834	1
c210	control	f	71	6	n	n	n/a	n/a	n/a	2	good	4.5	3	8	1.6169	5	6	4	4	4	6	1	1	1	1	1	4	2	0	0	0	3	6	4	15				1
c211	control	f	58	8	n	n	n/a	n/a	n/a	0	good	16	9	16	1.4371	5	4	6	4	4	4	1	1	1	1	1	7	4	1	1	1	4	9	6	26	140.808	3.6678	351.564	0
c212	control	m	67	12	n	n	n/a	n/a	n/a	0	above average	8.5	5	16	1.8865	4	4	6	5	6	6	1	1	1	0	1	6	4	1	1	1	5	6	6	24	86.5111	2.3836	413.3	1
c213	control	m	55	12	y	n	n/a	n/a	n/a	0	average	12.25	8	17	2.0073	5	7	4	7	7	1	1	1	1	1	1	4	4	1	1	1	4	8	6	25		3.0022	411.736	2
c214	control	m	65	9	y	n	n/a	n/a	n/a	0	above average	12.25	8	15	1.0432	4	4	5		2	3	1	1	0	1	1	6	4	1	0	1	5	5	6	22	144.243	3.2897	441.532	0
c215	control	f	57	12	n	n	n/a	n/a	n/a	0	good	8.5	7	18	1.8471	5	4	4	7	4	1	1	1	1	1	1	3	4	1	1	1	4	10	6	27	232.069	2.3836	421.35	5
c216	control	m	47	12	y	n	n/a	n/a	n/a	0	average	12.25	7	17	1.8231	4		4	7	4	4	0	1	1	1	1	7	4	1	1	1	6	6	5	24	68.4959	3.0022	468.007	0
c217	control	m	38	12	y	n	n/a	n/a	n/a	0	average	9.75	8	17	1.5049	4	4	7	7	7	4	0	1	1	1	1	8	3	1	2	1	4	7	6	24	60.5434	4.2561	481.65	5
c218	control	f	31	15	n	n	n/a	n/a	n/a	0	average	7.25	9	18	1.2897	5	4	7	7	6	5	1	1	1	1	1	6	4	1	2	1	6	9	6	29	-13.1764	4.2561	540.871	4
c219	control	m	33	12	y	n	n/a	n/a	n/a	0	poor	20	7	15	0.9852	5	2	7	7	7	4	1	1	1	1	1	5	4	1	2	1	4	10	6	28	85.9632	4.2561	408.721	2
c220	control	f	34	15	n	n	n/a	n/a	n/a	0	average	11	10	15	1.0432	5	6	6	7	6	5	1	1	1	1	1	3	3	1	1	1	6	9	6	27	-60.0461	3.0022	333.486	5
c221	control	f	48	6	n	n	n/a	n/a	n/a	0	average	16.5	6	14	2.058	4	4	7	7	7	1	1	1	1	1	0	4	4	0	1	1	4	9	5	24	62.874	3.2897	452.275	7
c222	control	f	31	9	y	y	n/a	n/a	n/a	0	above average	10	9	16	1.4552	5	7	4	7	4	4	1	1	1	1	1	3	3	1	1	1	6	6	6	24	94.5897	4.2561	370.721	0
c223	control	f	70	9	n	n	n/a	n/a	n/a	0	above average	6.5	7	17	1.5676	5	6	6	6	4	4	1	1	1	1	1	7	4	1	2	1	4	9	6	27				0
c224	control	f	66	9	n	n	n/a	n/a	n/a	1	average	7.25	8	13	1.5811	4	4	4	4	3	4	1	1	1	1	0	7	4	1	0	1	5	8	6	25	563.947	3.0022	535.986	1
c225	control	m	59	7	n	n	n/a	n/a	n/a	0	average	12.5	4	15	2.0864	5	3	6	6	4	4	1	1	1	1	1	5	3	1	0	1	6	7	6	24	256.815	1.567	433.978	11
c226	control	m	45	12	y	y	n/a	n/a	n/a	0	average	11.5	6	16	1.7823	5	4	4	7	4	4	1	1	1	1	1	3	3	0	2	1	5	5	6	22		1.8055	400.293	8
c227	control	f	63	12	n	n	n/a	n/a	n/a	0	good	7	5	14	2.6844	4	7	7	7	4	7	1	1	1	1	0	8	2	0	0	1	2	6	6	17		1.567	417.664	3
c228	control	m	49	12	y	y	n/a	n/a	n/a	0	above average	13.5	4	17	2.0073													4	0	1	1	6	9	6	27				1
c229	control	f	59	5	n	n	n/a	n/a	n/a	0	below average	15	7	11	1.3921	4	3	5	5	3	2	1	1	1	1	0	4	1	0	0	1	2	5	6	15	48.3226	2.2215	501.853	8
c230	control	m	27	20	n	n	n/a	n/a	n/a	0	average	15.5	7	15	1.3492	5	6	6	7	5	7	1	1	1	1	1	2	4	1	2	1	6	10	6	30	-83.5416	4.2561	563.364	1
c231	control	f	58	10	n	n	n/a	n/a	n/a	0	good	7	8	15	1.1504	4	7	7	7	7	4	1	1	1	1	0	8	3	1	0	1	4	7	5	21	87.6355	3.2897	398.321	1
c232	control	f	60	16	n	n	n/a	n/a	n/a	0	above average	13.5	8	16	2.1213	5	2	6	7	5	5	1	1	1	1	1	8	4	1	1	1	5	9	6	27	265.092	3.2897	365.779	2
c233	control	f	61	15	n	y	n/a	n/a	n/a	0	above average	12	7	18	1.0922	5	1	5	2	1	2	1	1	1	1	1		4	1	2	1	4	6	6	24	146.918	4.2561	552.087	2
c234	control	m	44	18	n	y	n/a	n/a	n/a	0	average	13.25	5	13	1.4371	4	3	6	7	6	5	0	1	1	1	1	4	3	1	2	1	5	9	6	27				0
c235	control	m	22	12	y	y	n/a	n/a	n/a	0	average	11.5	8	17	1.4473	4	1	5	6	4	1	1	1	1	1	0		4	1	1	1	4	8	6	25	233.307	2.3836	336.829	5
c236	control	m	28	12	y	y	n/a	n/a	n/a	0	below average	5.5	6	18	1.7197	4	4	4	5	4	4	1	1	1	1	0	3	4	1	1	1	5	10	6	28	319.345	1.349	336.171	5
c237	control	m	31	16	y	n	n/a	n/a	n/a	0	average	7.25	7	16	1.6803	4	3	7	5	5	4	1	1	1	0	1	7	4	1	1	1	5	7	6	25	161.514	4.2561	443.943	2
c238	control	f	29	9	y	y	n/a	n/a	n/a	0	above average	11.25	7	16	1.3235	5	1	7	4	7	1	1	1	1	1	1	4	3	1	0	1	5	5	6	21	98.42	4.2561	414.079	4
c239	control	m	30	12	y	y	n/a	n/a	n/a	0	above average	13	5	14	1.7112	3	3	5	6	6	1	1	1	1	0	0	9	4	1	1	1	6	10	6	29	34.1042	3.6678	310.393	2
c240	control	m	48	9	y	y	n/a	n/a	n/a	0	average	9.75	7	16	1.2485	5	1	4	1	1	1	1	1	1	1	1	6	2	1	2	1	5	8	6	25	383.644	4.2561	526.446	1
c241	control	m	57	12	y	y	n/a	n/a	n/a	0	below average	11.5	4	16	1.5435	5	4	4	4	7	4	1	1	1	1	1	3	3	1	2	1	4	6	6	23	49.2679	4.2561	512.626	9
c242	control	f	23	12	y	y	n/a	n/a	n/a	0	average	14.75	6	14	2.0292	5	4	7	7	7	4	1	1	1	1	1	5	3	1	1	1	5	6	6	23	372.308	4.2561	387.014	0
c243	control	f	63	8	n	n	n/a	n/a	n/a	2	average	9.75	2	13	2.3326	4	4	4	7	7	4	1	1	1	1	0	4	3	0	0	0	3	6	5	17	-42.3403	2.0729	483.368	1
c244	control	f	29	9	y	y	n/a	n/a	n/a	0	poor	14.75	7	12	2.3577	3	7	4	7	7	7	1	1	1	0	0	4	2	0	1	0	1	8	6	18	492.254	3.2897	391.957	1
c245	control	m	32	11	y	y	n/a	n/a	n/a	0	above average	15.75	9	16	0.686	5	7	7	7	5	6	1	1	1	1	1	4	4	1	2	1	6	8	6	28	54.8572	3.2897	360.288	8
c246	control	f	27	12	y	y	n/a	n/a	n/a	0	above average	9.25	7	18	1.166	5	6	7	7	6	4	1	1	1	1	1	5	3	1	1	1	4	7	6	23	144.206	4.2561	400.064	2
c247	control	f	24	12	y	y	n/a	n/a	n/a	0	good	7.75	5	15	1.2783	5	3	6	6	6	5	1	1	1	1	1	6	4	1	2	1	5	6	6	25	208.37	4.2561	382.558	0
c248	control	f	30	9	y	y	n/a	n/a	n/a	0	average	9.25	6	14	2.058	4	4	4	1	4	4	1	1	1	1	0	6	4	1	0	1	2	5	6	19	4.5745	2.3836	380.657	15
c249	control	f	34	16	n	n	n/a	n/a	n/a	0	average	9.5	9	18	1.5811	5	4	7	4	7	7	1	1	1	1	1	6	4	1	1	1	5	6	6	24	-116.96	3.2897	448.479	6
c250	control	f	53	4	n	n	n/a	n/a	n/a	1	above average	9.75	5	15	1.5435	5	5	6	5	4	4	1	1	1	1	1	8	2	1	0	0	3	5	6	17	-58.5841	2.766	404.214	21
c251	control	f	37	15	n	n	n/a	n/a	n/a	0	good	8.5	9	14	1.819	5	4	7	7	4	7	1	1	1	1	1	6	4	1	1	1	4	8	6	25	29.3096	3.6678	424.564	4
c252	control	f	63	12	n	n	n/a	n/a	n/a	0	average	9.25	7	16	1.4142	5	4	4	7	4	4	1	1	1	1	1	4	3	0	0	1	3	7	6	20	77.6222	4.2561	567.684	8
c253	control	f	53	15	n	n	n/a	n/a	n/a	0	good	7	7	16	1.1318	5	4	5	3	5	3	1	1	1	1	1	5	4	0	2	1	4	8	6	25	774.711	3.2897	351.093	8
c254	control	f	34	16	n	n	n/a	n/a	n/a	0	average	7.5	5	17	1.4473	5	2	6	6	3	3	1	1	1	1	1	3	4	1	2	1	5	6	6	25	39.25	4.2561	390.029	6
c255	control	f	38	9	n	n	n/a	n/a	n/a	0	average	14	8	15	1.855	4	4	4	7	4	4	1	1	0	1	1	2	4	1	1	1	4	9	6	26	39.1947	4.2561	400.393	0
c256	control	f	47	9	n	n	n/a	n/a	n/a	0	average	20	7	14	1.0607	5	4	7	4	4	7	1	1	1	1	1	7	4	1	1	1	3	5	6	21	83.5625	3.6678	432.748	0
c257	control	m	63	12	y	n	n/a	n/a	n/a	0	average	19.5	7	15	2.8748	3	4	4	4	7	1	1	1	1	0	0	5	3	1	1	1	4	8	6	24		3.2897	515.424	0
c258	control	m	63	9	n	n	n/a	n/a	n/a	0	average	5.5	5	15	2.5725	5	1	4	7	4	1	1	1	1	1	1	4	4	1	1	1	5	6	5	23	146.421	3.0022	415.115	0
c259	control	f	29	15	n	n	n/a	n/a	n/a	0	below average	9.5	7	18	1.3346	5	4	7	7	5	7	1	1	1	1	1	4	4	1	1	1	5	8	6	26	109.913	3.0022	341.014	0
c260	control	m	66	4	y	y	n/a	n/a	n/a	0	average	10.5		10	2.2981																								14
c261	control	f	30	9	y	y	n/a	n/a	n/a	0	good	15.25	6	16	1.8787	2	4	7	7	4	2	1	1	0	0	0	4	4	1	1	1	4	6	6	23	133.362	4.2561	480.143	0
c262	control	f	42	8	y	n	n/a	n/a	n/a	0	above average	14.25	7	16	0.8575	5	1	4	1	1	2	1	1	1	1	1	8	4	1	2	1	5	9	6	28	13.9304	4.2561	396.15	3
c263	control	f	35	12	n	n	n/a	n/a	n/a	0	good	15.5	7	16	1.7823	5	1	7	7	7	4	1	1	1	1	1	6	4	1	1	1	3	8	6	24	67.2568	3.2897	374.686	3
c264	control	f	64	4	n	n	n/a	n/a	n/a	0	average	5.75	8	14	1.3394	4	3	6	5	4	4	1	1	1	1	0	7	4	0	1	1	3	7	6	22	14.7779	0.86145	370.829	1
c265	control	m	30	12	y	y	n/a	n/a	n/a	0	above average	7.5	7	17	0.7859	3	7	6	7	5	4	1	1	1	0	0	5	4	1	1	1	5	7	6	25	90.271	3.6678	370.436	5
c266	control	f	20	16	y	y	n/a	n/a	n/a	0	above average	9.75	6	17	2.1205	4	7	6	7	6	2	1	1	1	1	0	5	4	1	2	1	5	10	6	29	-59.1998	3.0022	387.547	20
c267	control	m	57	10	n	y	n/a	n/a	n/a	0	below average	10.5	9	16	1.149	5	2	5	4	4	4	1	1	1	1	1	6	3	1	0	1	4	9	6	24	-27.7437	3.2897	536.022	12
c268	control	f	48	16	n	n	n/a	n/a	n/a	0	good	9.5	6	17	1.5339	4	1	4	4	4	1	1	1	1	1	0	5	3	0	2	1	4	8	6	24	-96.0909	3.6678	422.847	2
c269	control	f	54	9	n	n	n/a	n/a	n/a	0	average	11.5	6	17	1.4951	5	6	7	7	7	4	1	1	1	1	1		3	1	2	1	3	7	6	23	243.847	4.2561	557.529	0
c270	control	f	33	12	y	y	n/a	n/a	n/a	0	good	13.25	7	16	0.9852	5	4	5	7	5	4	1	1	1	1	1	2	4	1	1	1	4	9	6	26	101.143	4.2561	366.486	11
c271	control	f	53	7	n	n	n/a	n/a	n/a	0	average	15	6	15	1.645	5	7	7	7	7	4	1	1	1	1	1	5	2	1	1	1	4	8	6	23	10.6151	2.766	401.829	1
c272	control	f	24	17	n	n	n/a	n/a	n/a	0	good	16.25	8	17	1.2485	5	7	6	4	6	5	1	1	1	1	1	6	3	1	2	1	6	9	6	28	198.134	2.766	472.771	0
c273	control	m	59	7	n	y	n/a	n/a	n/a	1	above average	7	6	12	1.195	5	1	5	6			1	1	1	1	1	6	4	1	2	1	2	7	6	23	-241.47	4.2561	535.493	5
c274	control	m	58	14	n	n	n/a	n/a	n/a	1	average	10.75	6	15	1.2005	5	1	5	6	5	6	1	1	1	1	1	5	4	1	2	1	4	9	6	27	298.961	4.2561	542.014	0
c275	control	f	57	12	n	n	n/a	n/a	n/a	1	average	8.75	7	16	1.7823	5	7	7	7	4	7	1	1	1	1	1	6	4	1	2	1	5	6	5	24	118.535	3.2897	349.564	2
c276	control	m	57	12	y	y	n/a	n/a	n/a	1	average	9	7	15	1.8471	5	4	7	7	7	4	1	1	1	1	1	5	4	1	2	1	5	8	6	27	154.543	2.2215	305.864	1
c277	control	f	36	12	n	n	n/a	n/a	n/a	0	average	16.25	7	16	2.2752	5	5	6	7	6	4	1	1	1	1	1	2	4	1	1	1	4	5	5	21	170.117	3.2897	411.736	2
c278	control	m	39	23	n	n	n/a	n/a	n/a	0	above average	0	7	15	2.1963	4	7	7	7	4	4	1	1	1	1	0		4	1	2	1	5	10	6	29	463.434	2.766	393.273	0
c279	control	m	40	15	n	n	n/a	n/a	n/a	0	good	11	9	16	1.2005	5	5	6	5	2	3	1	1	1	1	1	6	4	1	1	1	5	9	5	26	414.893	4.2561	538.157	2
c280	control	f	52	12	n	n	n/a	n/a	n/a	0	average	10.75	6	16	2.0934	5	4	7	7	7	4	1	1	1	1	1	7	4	0	2	1	4	8	6	25	45.5086	2.3836	324.543	1
c281	control	f	60	12	n	n	n/a	n/a	n/a	0	above average	12.75	8	18	1.4552	5	4	7	7	7	4	1	1	1	1	1	7	4	1	1	1	6	8	6	27	181.234	4.2561	475.836	3
c282	control	m	62	9	y	n	n/a	n/a	n/a	0	below average	8.5	7	16	1.5049	5	6	6	7	7	6	1	1	1	1	1	6	4	1	2	1	3	6	3	20	349.834	4.2561	616.284	3
c283	control	f	50	6	n	n	n/a	n/a	n/a	0	average	17.5	7	8	1.8471	5	4	5	3	6	4	1	1	1	1	1	7	2	0	0	0	3	5	5	15	109.222	4.2561	629.791	3
c284	control	m	29	16	y	n	n/a	n/a	n/a	0	average	6.75	6	17	1.3827	5	4	4	4	4	4	1	1	1	1	1	5	3	1	2	1	5	8	6	26	104.513	3.6678	302.107	1
c285	control	f	45	9	n	n	n/a	n/a	n/a	0	good	10.75	8	18	1.2834	4	7	7	7	7	4	1	1	1	1	0	7	3	1	1	0	6	9	6	26	-124.398	4.2561	414.536	0
c286	control	m	26	12	y	y	n/a	n/a	n/a	0	good	15.5	8	15	1.8087	5	4	7	7	7	7	1	1	1	1	1	6	4	1	2	1	6	9	6	29	168.332	4.2561	367.843	3
c287	control	f	32	15	n	n	n/a	n/a	n/a	0	average	7.5	8	17	2.0292	5	4	3	7	7	4	1	1	1	1	1	5	4	1	2	0	6	8	6	27	203.29	2.5631	390.072	5
c288	control	f	54	12	n	n	n/a	n/a	n/a	0	above average	8.75	8	17	2.7225	5	4	7	7	7	6	1	1	1	1	1	7	4	0	2	1	4	9	6	26	-58.9809	4.2561	375.143	1
c289	control	m	57	12	y	n	n/a	n/a	n/a	0	average	10	8	17	2.0073	5	1	7	7	7	1	1	1	1	1	1	6	4	1	2	1	5	7	6	26				0
c290	control	m	34	16	y	y	n/a	n/a	n/a	0	average	11	9	18	1.8231	5	7	7	7	7	7	1	1	1	1	1	6	4	1	2	1	6	8	6	28	10.3709	2.766	396.829	0
c291	control	f	35	16	n	n	n/a	n/a	n/a	0	average	12.75	9	17	2.4793	5	7	7	7	7	7	1	1	1	1	1	7	4	1	2	1	6	10	6	30	-22.3441	3.2897	393	0
c292	control	f	55	12	n	n	n/a	n/a	n/a	0	average	10.5	8	17	1.3827	5	4	7	7	7	4	1	1	1	1	1	6	4	1	2	1	5	8	6	27	-65.0426	3.6678	342.593	1
c293	control	m	57	12	y	n	n/a	n/a	n/a	0	average	11	1	15	0.3234	4	6	7	6	6	7	0	1	1	1	1	7	4	1	1	1	4	6	6	23	63.978	3.6678	430.971	2
c294	control	f	52	9	n	n	n/a	n/a	n/a	1	average	12.7	7	17	0.3234	5	6	6	6	6	6	1	1	1	1	1	6	4	1	1	1	4	10	6	27	56.4155	2.766	471.586	1
c295	control	f	36	16	n	n	n/a	n/a	n/a	0	above average	16.25	9	12	2.3009	3	6	7	4	7	4	0	1	1	1	0	6	2	0	0	1	3	5	5	16	30.289	3.0022	323.171	2
c296	control	m	32	15	y	n	n/a	n/a	n/a	0	average	10.75	8	17	0.9003	5	2	7	5	5	4	1	1	1	1	1	9	4	1	1	1	5	9	6	27	54.4642	1.8055	366.343	11
c297	control	m	40	15	n	y	n/a	n/a	n/a	0	good	10.75	6	18	1.5049	5	1	7	6	4	5	1	1	1	1	1	7	4	1	2	1	5	9	6	28	125.164			4
c298	control	f	57	9	n	n	n/a	n/a	n/a	0	average	11.5	5	15	1.7112	5	2	6	4	5	4	1	1	1	1	1	8	4	1	0	1	3	7	5	21	437.084	2.766	460.37	7
c299	control	f	57	9	y	n	n/a	n/a	n/a	0	average	7	5	15	1.5645	5	2	7	7	5	7	1	1	1	1	1	5	4	1	1	1	5	8	6	26	416.04	1.6832	355.727	2
c300	control	f	59	12	y	n	n/a	n/a	n/a	1	good	3.5	5	18	1.38	5	6	7	7	5	7	1	1	1	1	1	5	3	1	1	1	4	9	5	24	25.087	1.349	352.389	4

## Sheet: follow-up 1_mid-late 2020
SubjID	Group	Sex	Age (yr.)	Education (yr.)	Regular smoker	Regular drinker	Severity group	Days since discharge	Odor threshold	Odor discrim.	Taste id.
p014	patient	f	33	12	n	n	nonsevere	273	11.75	9	5
p028	patient	m	64	12	n	n	nonsevere	316	6	6	5
p033	patient	f	56	15	n	n	severe	289	9.5	7	4
p043	patient	m	41	16	n	n	nonsevere	97	4.75	6
p043	patient	m	41	16	n	n	nonsevere	255	6.75	7
p044	patient	f	48	12	n	n	nonsevere	288	11	8	5
p053	patient	f	61	9	n	n	severe	253	8.5	6
p060	patient	f	58	12	n	n	nonsevere	105	9.25	5
p061	patient	m	58	12	y	y	severe	87	10.25	8
p069	patient	f	42	15	n	n	nonsevere	268	20	3	5
p074	patient	f	60	12	n	n	nonsevere	133	9	7
p080	patient	f	56	12	n	n	nonsevere	278	12.5	8
p081	patient	m	40	11	y	n	severe	109	6.75	3
p085	patient	m	51	16	n	n	nonsevere	267	7	8	5
p086	patient	f	48	15	n	n	nonsevere	236	8.25	6	5
p088	patient	f	42	16	n	n	nonsevere	272	12	8	4
p103	patient	f	58	14	n	n	nonsevere	277	18	7	5
p111	patient	f	40	16	n	n	nonsevere	88	5.5	7
p112	patient	f	61	13	n	n	nonsevere	307	15.75	7	4
p116	patient	f	51	9	n	n	nonsevere	281	8.5	7	5
p118	patient	f	64	12	n	n	nonsevere	82	7.25	5
p118	patient	f	64	12	n	n	nonsevere	239	9.25	5	4
p122	patient	f	66	14	n	n	nonsevere	251	7.25	6	5
p123	patient	m	50	15	n	n	severe	234	15	8
p124	patient	m	57	12	n	n	nonsevere	126	7	8
p124	patient	m	57	12	n	n	nonsevere	284	12.75	8
p133	patient	f	48	12	n	n	nonsevere	134	11.5	8
p133	patient	f	48	12	n	n	nonsevere	276	7.75	8	5
p134	patient	f	66	27	n	n	severe	263	11.5	7	5
p137	patient	f	68	9	n	n	nonsevere	123	9	5
p139	patient	f	54	6	n	n	nonsevere	89	0	3.33
p153	patient	f	62	12	n	n	severe	129	1.5	3
p153	patient	f	62	12	n	n	severe	265	9.5	7	2
p154	patient	f	62	14	n	n	nonsevere	148	13.25
p154	patient	f	62	14	n	n	nonsevere	314	14.5	7	5
p155	patient	m	36	16	n	n	severe	130	11.25	8
p155	patient	m	36	16	n	n	severe	293	12.25	3	5
p156	patient	f	36	12	n	n	nonsevere	322	11.5	6	5
p176	patient	m	26	14	n	n	nonsevere	294	14.5	9	4
p181	patient	m	57	12	n	n	nonsevere	265	10.75	8	4
p185	patient	f	48	16	n	n	nonsevere	232	11.25	9	5
p186	patient	f	50	15	n	n	nonsevere	319	10.25	10	4
p188	patient	f	47	9	n	n	nonsevere	272	13.5	9	5
p191	patient	f	43	12	n	y	nonsevere	266	18.5	7	5
p192	patient	f	48	12	n	n	nonsevere	290	15.5	6	5
p193	patient	m	56	8	y	n	nonsevere	267	9.5	6	4
p194	patient	f	64	12	n	n	nonsevere	265	20	6	5
p195	patient	m	35	16	n	n	nonsevere	151	9.25
p202	patient	m	54	11	y	n	nonsevere	75	7.5	4
p202	patient	m	54	11	y	n	nonsevere	221	7.75	6	5
p206	patient	f	53	12	n	n	nonsevere	72	5.5	8
p216	patient	m	66	15	n	n	severe	314	10.5	9	5
p233	patient	f	34	12	n	n	nonsevere	123	10.75	5
p233	patient	f	34	12	n	n	nonsevere	275	16.5	9	5
p239	patient	m	71	11	n	y	nonsevere	323	13	9	5
p241	patient	m	54	9	n	y	severe	256	11.5	9
p247	patient	f	57	15	n	n	severe	293	20	9	5
p261	patient	f	55	12	n	n	nonsevere	249	9	5	5
p262	patient	f	64	10	n	n	severe	122	6.25	3
p262	patient	f	64	10	n	n	severe	279	12.5	7	5
p263	patient	f	48	12	n	n	nonsevere	140	11.5	9
p263	patient	f	48	12	n	n	nonsevere	291	11	5	4
p276	patient	f	58	10	n	n	nonsevere	274	3.75	4	4
p277	patient	f	58	10	n	n	nonsevere	255	11.5	7	5
p278	patient	m	56	12	n	n	nonsevere	274	12.75	7	4
p303	patient	f	46	9	n	n	nonsevere	282	7.5	5	5
p304	patient	f	65	12	n	n	nonsevere	304	16.25	6	4
p318	patient	f	51	16	n	n	nonsevere	268	18.75	5	5
p325	patient	f	51	7	n	n	nonsevere	296	10.25	6	5
p335	patient	f	44	8	n	n	severe	267	15.25	7	4
p340	patient	f	39	15	n	n	nonsevere	294	10	6	5
p343	patient	m	24	18	n	n	nonsevere	294	13.5	7	3
p344	patient	f	57	9	n	n	nonsevere	279	16.5	7	5
p363	patient	f	54	12	n	n	nonsevere	266	9	7	5
p393	patient	f	46	12	n	n	nonsevere	287	0	5	5
p403	patient	f	57	15	n	n	severe	265	6	8	4
p404	patient	f	62	12	n	n	nonsevere	255	9	7	5
p413	patient	m	61	12	n	n	severe	212	15.75	8	5
p414	patient	f	61	12	n	n	nonsevere	271	14	6	5
p415	patient	m	61	10	n	y	nonsevere	273	9.75	8	4
p419	patient	f	59	15	n	n	nonsevere	285	7.75	7	5
p430	patient	f	61	12	n	n	nonsevere	290	11.75	9	5
p460	patient	m	44	13	n	y	nonsevere	299	14.75	4
p462	patient	m	43	12	n	n	nonsevere	283	10.5	7	4
p463	patient	f	63	13	n	n	severe	287	12.5	6	4
p465	patient	f	35	15	n	n	nonsevere	278	9.75	7	5

## Sheet: follow-up 2_mid 2021
SubjID	Group	Sex	Age (yr.)	Education (yr.)	Regular smoker	Regular drinker	Severity group	Days since discharge	Odor id.	TG lateralization	MoCA	BDI-SF	GAD-7
p028	patient	m	64	12	n	n	nonsevere	559	16	3	22	6	4
p033	patient	f	56	15	n	n	severe	530	15	5	24	0	2
p041	patient	m	54	9	n	n	nonsevere	518	16	7	24	5	3
p044	patient	f	48	12	n	n	nonsevere	525	17	2	24	10	16
p053	patient	f	61	9	n	n	severe	497	12	7	18	38	21
p063	patient	f	51	12	n	n	nonsevere	560	14	8	24	1	9
p080	patient	f	56	12	n	n	nonsevere	524	17	4	19	2	2
p085	patient	m	51	16	n	n	nonsevere	512	15	6	27	16	18
p086	patient	f	48	15	n	n	nonsevere	483	16	6	22	0	9
p108	patient	m	51	15	n	y	nonsevere	524	18	5	25	1	3
p112	patient	f	61	13	n	n	nonsevere	544	18	3		0	3
p116	patient	f	51	9	n	n	nonsevere	520	15	8	22	16	12
p119	patient	f	64	14	n	n	nonsevere	528	17	4	27	0	1
p120	patient	m	63	15	n	n	nonsevere	528	14	6	23	4	4
p122	patient	f	66	14	n	n	nonsevere	491	17	4	29	4	3
p123	patient	m	50	15	n	n	severe	475	14	8	26	2	1
p124	patient	m	57	12	n	n	nonsevere	528	17	5	25	2	6
p125	patient	m	67	15	n	n	severe	531	18	6	23	3	6
p126	patient	f	66	12	n	n	nonsevere	521	17	3	26	4	0
p128	patient	f	52	12	n	n	nonsevere	489	16	8	27	5	3
p134	patient	f	66	27	n	n	severe	506	10	6	27	2	4
p135	patient	f	67	12	n	n	severe	516	5	7	19	0	0
p145	patient	m	67	9	n	n	nonsevere	544	14	6	16	0	1
p146	patient	f	66	12	n	n	nonsevere	542	18	6	23	0	1
p153	patient	f	62	12	n	n	severe	508	3	2	19	20	10
p159	patient	f	57	12	n	n	nonsevere	498	17	5	21	2	0
p181	patient	m	57	12	n	n	nonsevere	503	10	7	25	21	10
p185	patient	f	48	16	n	n	nonsevere	476	18	6	26	3	3
p186	patient	f	50	15	n	n	nonsevere	560	16	5	28	5	7
p192	patient	f	48	12	n	n	nonsevere	537	18	5	22	1	7
p193	patient	m	56	8	y	n	nonsevere	514	15	7	26	1	4
p194	patient	f	64	12	n	n	nonsevere	505	18	5	27	2	3
p200	patient	f	58	12	n	n	nonsevere	530	15	7	19	0	4
p202	patient	m	54	11	y	n	nonsevere	468	14	4	23	1	0
p216	patient	m	66	15	n	n	severe	555	17	7	26	4	3
p217	patient	m	57	15	n	y	nonsevere	514	17	6	23	1	3
p218	patient	f	59	15	n	n	nonsevere	557	18	8	25	1	1
p219	patient	f	50	16	n	n	severe	516	7	7	28	1	8
p239	patient	m	71	11	n	y	nonsevere	564	17	6	26	7	4
p241	patient	m	54	9	n	y	severe	499	14	5	22	0	2
p247	patient	f	57	15	n	n	severe	535	18	4	27	1	0
p259	patient	m	63	7	n	y	nonsevere	530	16	9	26	1	5
p260	patient	f	60	6	n	n	nonsevere	516	6	5	22	20	12
p261	patient	f	55	12	n	n	nonsevere	501	9	9	29	1	2
p269	patient	m	66	6	n	y	severe	564	14	5		17	7
p270	patient	f	50	15	n	n	nonsevere	525	18	7	25	1	1
p276	patient	f	58	10	n	n	nonsevere	521	18	7	27	16	7
p277	patient	f	58	10	n	n	nonsevere	511	16	8	20	18	19
p278	patient	m	56	12	n	n	nonsevere	512	15	7	20	5	5
p289	patient	f	74	12	n	y	nonsevere	525	16	6	28	7	5
p304	patient	f	65	12	n	n	nonsevere	546	17	8	22	0	0
p317	patient	f	66	12	n	n	nonsevere	438	17	4	27	7	8
p318	patient	f	51	16	n	n	nonsevere	510	17	8	24	17	13
p363	patient	f	54	12	n	n	nonsevere	508	17	5	26	5	3
p393	patient	f	46	12	n	n	nonsevere	526	6	7	26	11	9
p400	patient	f	65	12	n	n	severe	522	18	5	20	7	8
p403	patient	f	57	15	n	n	severe	505	15	3	21	6	0
p404	patient	f	62	12	n	n	nonsevere	505	18	2	26	4	3
p413	patient	m	61	12	n	n	severe	455	16	5	26	2	4
p414	patient	f	61	12	n	n	nonsevere	514	17	9	21	10	7
p415	patient	m	61	10	n	y	nonsevere	510	15	7	23	0	1
p419	patient	f	59	15	n	n	nonsevere	533	18	5	26	16	8
p421	patient	f	53	11	n	n	nonsevere	519	18	4	27	7	1
p430	patient	f	61	12	n	n	nonsevere	527	17	4	23	2	9
p447	patient	m	64	16	n	n	nonsevere	535	10	4	22	6	3
p448	patient	f	50	9	n	n	nonsevere	530	10		19	16	10
p463	patient	f	63	13	n	n	severe	522	15	9	20	3	1
p468	patient	f	57	12	n	n	nonsevere	523	16	4	23	13	12
x001	patient	m	51	15	n	n	severe	530	18	5	29	3	6
x002	patient	f	58	9	n	n	nonsevere	526	14	5	19	8	5
x003	patient	m	63	12	n	y	nonsevere	521	7	7	23	13	3
x004	patient	f	64	14	n	n	nonsevere	365	18	4	29	7	5
x005	patient	f	60	14	n	n	nonsevere	509	15	6	21	3	0
x006	patient	m	50	12	n	n	nonsevere	533	18	5		12	9
x007	patient	f	62	14	n	n	nonsevere	524	17	6	24	15	13
x008	patient	f	53	12	n	n	nonsevere	522	18	7	26	2	2
x009	patient	f	74	6	n	n	nonsevere	519	14	5		3	5
x010	patient	f	53	12	n	n	severe	548	17	3	22	4	7
x011	patient	m	57	13	n	y	nonsevere	506	13	8	22	4	3
x012	patient	m	66	9	n	n	nonsevere	527	16	4	14	6	5
x013	patient	f	58	11	n	n	severe	506	15	6	24	5	7
x014	patient	f	53	12	n	n	nonsevere	515	17	6	24	7	0
x015	patient	m	51	11	y	n	nonsevere	521	13	4	21	9	0
x016	patient	m	50	12	n	y	nonsevere	531	18	10	26	10	6
x017	patient	f	64	0	n	n	nonsevere	533	17	5	20	3	3
x018	patient	f	60	11	n	n	severe	578	17	3	19	22	16
x019	patient	m	57	15	n	n	severe	512	15	7	22	1	6
x020	patient	m	64	12	y	y	nonsevere	516	14	7	18	2	2
x021	patient	f	58	9	n	n	nonsevere	528	9	5	18	13	7
x022	patient	f	59	12	n	n	severe	547	18	8	19	4	0
x023	patient	m	59	11	y	y	nonsevere	520	16	7	22	4	3
x024	patient	m	60	12	n	y	nonsevere	530	17	6	27	0	0
x025	patient	f	63	11	n	n	nonsevere	537	17	4	22	4	5
x026	patient	f	60	12	n	n	nonsevere	532	18	3	23	1	0
x027	patient	f	59	12	n	n	nonsevere	565	18	5	22	2	0
x028	patient	f	58	12	n	n	nonsevere	507	17	6	26	0	0
x029	patient	m	55	9	n	n	nonsevere	531	17	7	22	1	0
x030	patient	m	52	9	n	n	nonsevere	534	18	7	20	0	2
x031	patient	f	65	0	n	n	nonsevere	535	13	9	17	10	5
x032	patient	f	56	10	n	n	nonsevere	535	18	5	24	1	0
x033	patient	f	58	9	n	n	nonsevere	524	18	3	21	7	1
x034	patient	f	59	9	n	n	nonsevere	519	12	5	18	8	4
x035	patient	m	76	9	n	n	nonsevere	525	4	6		17	6
x036	patient	f	53	8	n	n	nonsevere	532	14	6	16	12	14
x037	patient	f	53	8	n	n	nonsevere	513	17	7	19	3	5
x038	patient	f	53	12	y	n	nonsevere	513	15	3	23	23	13
x039	patient	m	75	16	n	n	nonsevere	534	13	2	20	1	1
x040	patient	f	72	12	n	n	nonsevere	522	16	6	21	7	4
x041	patient	f	66	12	n	n	nonsevere	541	16	10	18	7	15
x042	patient	f	51	6	n	n	nonsevere	546	18	3	18	0	2
x043	patient	m	65	9	y	n	nonsevere	529	15	6	24	1	2
x044	patient	f	71	9	n	n	nonsevere	521	15	8	23	0	3
x045	patient	f	57	9	n	n	nonsevere	527	13	5	22	8	5
x046	patient	m	49	9	n	n	nonsevere	535	14	8	20	0	4
x047	patient	f	57	9	n	n	nonsevere	508	16	8	19	0	2
x048	patient	f	46	12	n	n	nonsevere	540	17	6	27	8	4
x049	patient	f	66	12	n	n	nonsevere	514	16	7	21	11	11
x050	patient	f	51	11	n	n	nonsevere	543	16	5	21	3	2
x051	patient	f	56	12	n	n	nonsevere	542	18	8		16	8
x052	patient	m	73	15	n	n	nonsevere	540	16	4	23	10	6
x053	patient	m	73	18	n	n	nonsevere	561	18	3	19	2	6

## Sheet: notes
No. underlying cond.	number of underlying conditions
Subj. smell function	subjective evaluation of one's sense of smell
Odor valence SD.	standard deviation of one's valence ratings for the 18 odorants used in the odor identification test
TG lateralization	trigeminal lateralization
Go/no-go RT	mean reaction time for the go trials in the go/no-go task
discrim.	discrimination
id.	identification
int.	intensity
