# Supplementary material for: Trajectories of chemosensory and cognitive functions up to 1.5 years after acute COVID-19
Source: Research Square preprint supplement (doi:10.21203/rs.3.rs-1239133/v1), 2022-01-12
Supplement: Supplementary file 3 [file 9431a7539c3beb86cf5897c4.xlsx]

## Sheet: initial evaluation_mid 2020
SubjID	Group	Sex	Age (yr.)	Education (yr.)	Regular smoker	Regular drinker	Severity group	COVID-19 severity	Days since discharge	No. underlying cond.	Subj. smell function	Odor threshold	Odor discrim.	Odor id.	Taste id.	Sour int.	Sweet int.	Bitter int.	Salty int.	Umami int.	TG lateralization	Visuospatial ability	Abstraction	Language	Memory	Orientation	MoCA	Switch cost	Go/no-go d'	Go/no-go RT	BDI-SF
p001	patient	m	42	12	n	n	nonsevere	mild	14	0	average		-0.59758									0.856495	-0.67192	0.214202	-0.0368113	0.360862	0.221449		1.07231	-0.577842	-0.570937
p002	patient	m	52	9	n	n	nonsevere	moderate	36	0	good	-1.5616	1.3924	-0.417895	0.473558	-1.07562	-1.56871	-0.397277	-0.192676	0.203618	-0.497299	-0.290003	1.23145	-1.16819	0.383003	0.400768	-0.0745774	-0.530782	0.0826653	0.24563	1.80872
p003	patient	f	50	16	n	n	nonsevere	moderate	64	0	average	-0.999357	1.97617	0.112774	0.479217	1.46613	0.0790934	0.756037	1.16857	0.74647	-1.11298	0.406117	0.744396	0.206725	-0.226833	0.102161	0.200791	1.79641	0.516553	0.794019	0.704353
p004	patient	m	39	20	n	n	nonsevere	moderate	60	0	average	-0.279338	0.201044	-0.196958	0.578672	-1.44419	0.165321	-0.168395	0.545562	0.90153	-1.46709	-0.282076	0.239735	0.288032	-0.703493	-0.317505	-0.409874	-0.385762	-0.167124	-0.862897	0.437279
p005	patient	f	57	12	n	n	nonsevere	moderate	50	0	good	0.827945	0.224852	1.20993	0.478811	-0.567273	0.0790934	0.756037	0.487946	0.74647	-0.497299	0.861423	1.23145	1.78264	-1.21158	0.400768	0.543371	0.48785	-0.751142	-0.027445	-0.841761
p006	patient	f	43	15	n	n	nonsevere	moderate	54	0	average	-1.72787	1.31153	0.0748843	0.669824	-0.614214	0.275943	-0.226336	0.505848	-1.25656	-2.54862	-1.04884	0.728541	-1.31373	1.05371	0.0865492	0.0460004	0.484681	-2.66304	0.0803598	0.268584
p007	patient	f	33	12	n	n	nonsevere	moderate	81	0	above average	-2.09187	0.201044	0.0632797	-1.25729	1.30202	0.924502	0.588189	1.19186	1.55681	0.696847	-3.18652	-0.501214	-1.98897	-1.39791	-2.86615	-2.86072	0.0960093	0.314522	0.270769	-0.914606
p008	patient	f	59	10	n	n	severe	severe	74	0	good	-2.12385	0.808626	0.799449	0.475309	-0.0589238	-0.744806	0.17938	-0.873297	-0.339234	-1.11298	-0.410831	1.23145	-1.29042	0.295884	-2.5012	-0.257432	-0.188575	0.0826653	-0.717746	-0.400014
p009	patient	f	71	9	n	n	nonsevere	mild	63	1	average	-0.376089	-0.120352	0.383502	0.536226	2.07585	1.1769	-0.589324	-0.214526	-0.136146	0.70762	0.698141	0.0607622	-0.11826	1.26713	0.565473	0.869628	1.30999	1.21046	0.51935	-0.716512
p010	patient	m	44	20	y	n	nonsevere	moderate	29	0	below average	-0.732075	1.31153	0.185128	0.271145	1.47825	-0.388319	0.836475	0.505848	0.454698	-0.571322	-0.0966015	0.0082864	0.355837	-1.42411	-0.408917	-0.958267	-0.88181	0.457575	0.62302	-0.570937
p011	patient	m	46	13	n	y	severe	severe	65	0	poor	-0.00182224	-1.79017	-1.22321	-1.85871	-0.0910975	0.940206	0.836475	-0.0666977	-0.11572	0.0877765	-0.803461	-2.53792	0.0881744	0.552766	0.284736	-0.406517	-0.289932	-2.40879	-1.21116	0.268584
p012	patient	f	49	15	n	n	severe	severe	63	0	average	-0.798461	1.31153	0.858635	0.669824	-0.614214	0.275943	0.305069	-0.0666977	-0.11572	0.746875	0.516857	0.728541	-0.16388	-0.302719	0.0865492	0.0460004	-0.301598	1.07231	-0.82337	1.1081
p013	patient	m	58	13	y	n	nonsevere	mild	61	0	good	-0.929076	-2.11024	-0.875678	-2.40428	-1.58397	0.902993	-2.70391	-2.91516	1.28932	0.734062	-0.773314	-0.512197	-0.54185	0.0345256	0.339891	-0.417157	-1.77215	0.779348	-0.446104	3.35483
p014	patient	f	33	12	n	n	nonsevere	mild	61	0	above average	-0.83704	-1.88214	0.757354	0.578371	0.752776	0.924502	-0.924978	-2.03963	-1.71961	-0.385119	1.00554	-0.501214	-0.916518	-0.670375	0.324204	-0.896247	-0.801822	-0.167124	-0.477541	1.78916
p015	patient	f	29	9	n	n	severe	critical	58	0	below average	0.278364	0.201044	-4.43737	0.574484	1.30202	0.924502	0.588189	1.19186	1.55681	-1.46709	1.00554	1.45868	1.20114	1.06993	0.324204	1.22961	1.72685	-0.167124	-0.347049	-0.689292
p016	patient	f	42	12	n	n	nonsevere	mild	65	0	average	-0.665688	0.0387889	0.478988	0.66941	1.47825	0.940206	0.836475	1.65094	-0.686138	1.40597	0.856495	-0.67192	1.33485	-1.39324	-3.46621	-0.632776	-0.680575	1.07231	1.68136	0.828264
p017	patient	m	70	12	n	n	nonsevere	moderate	43	2	average	-0.376089	-0.120352	0.583062	-2.41944	-2.0961	1.1769	1.14867	-0.214526	-0.136146	1.30342	0.698141	-2.02433	-0.533973	-0.879052	-1.26388	-1.44344		-0.359283	-1.15553	-0.389552
p018	patient	m	26	16	y	n	nonsevere	mild	70	0	poor	0.417789	-0.49335	-3.88425	0.284213	0.752776	0.165321	0.588189	-0.747035	-0.409038	1.23783	0.380943	-1.12887	-0.314243	0.404364	0.0129222	-0.0637195	0.238802	0.606244	-0.424176	0.887907
p019	patient	m	62	14	n	n	severe	severe	95	0	average	-0.95579	-0.774773	-0.136843	-4.55405	0.0106401	-1.24126	-0.923712	-0.565067	-0.0953613	-1.2914	-0.945324	1.31491	0.569898	0.878675	0.478125	0.826228	0.0547345	0.474181	-0.852269	-0.101179
p020	patient	f	54	11	n	n	nonsevere	moderate	45	2	average	-0.155987	-0.942695	1.20993	-4.48368	-0.0589238	-1.56871	-0.973934	-0.873297	-0.339234		-2.07357	-1.89804	-1.41266	-1.79107	0.400768	-2.38447	-0.149619	0.516553	-0.37167	2.02959
p021	patient	m	56	12	n	n	nonsevere	moderate	115	0	average	0.687383	-0.942695	1.20993	-2.00156	-1.07562	-1.56871	-1.55059	-2.91516	-1.42494		0.861423	1.23145	1.78264	0.121645	0.400768	1.32105	-1.04098	-1.14314	-0.898816	0.262606
p022	patient	m	44	15	n	n	nonsevere	mild	100	0	good	1.3923	0.0387889	-0.708866	0.669824	-0.0910975	0.275943	0.836475	0.505848	0.454698	-0.571322	0.516857	0.728541	0.985974	1.05371	0.0865492	1.32734	0.601798	-1.82433	-1.49042	-0.570937
p023	patient	m	40	16	y	n	severe	severe	56	1	good	-0.997621	0.0387889	-0.059817	0.264001	-0.0910975	-0.388319	0.305069	-0.639243	-0.686138	0.0877765	0.394165	0.58449	0.859946	0.286859	-0.0125441	0.699372	-0.432336	-1.19589	-2.15922	-0.291097
p024	patient	f	63	15	n	n	severe	severe	106	0	above average	-0.747137	-0.179337	-1.00377	0.63275	-0.559572	-0.422006	-0.30473	0.0169529	0.500117	-1.2914	-2.60363	1.20101	-1.61542	0.790725	0.436287	-0.634075	-0.732731	0.86662	-0.422996	-0.395007
p025	patient	m	67	15	n	n	nonsevere	moderate	110	1	good	-0.0516288	0.416098	0.193714	0.63275	0.0106401	-1.24126	-0.923712	-0.565067	-0.0953613	-1.2914	0.471967	1.20101	-0.579528	-0.555208	0.436287	-0.307404	4.3366	0.474181	-0.341162	-0.982662
p026	patient	f	63	12	n	n	nonsevere	moderate	99	2	average	1.20029	-0.179337	1.18194	0.632467	0.0106401	-1.24126	0.933234	-0.565067	-0.69084	-1.86404	-2.24211	1.5163	-0.238919	-0.291358	0.552105	-0.499886	1.52234	0.86662	0.473343	-0.688835
p027	patient	f	39	12	n	n	nonsevere	mild	107	0	good	-1.32503	0.895438	1.42378	0.578371	-1.44419	-2.11222	-3.19473	-1.39333	-1.71961	-0.385119	-1.07128	1.45868	0.155931	0.784689	0.324204	0.675329	0.381255	0.314522	-0.454283	0.437279
p028	patient	m	64	12	n	n	nonsevere	mild	108	1	average	-1.09489	-1.37021	0.000362422	0.632467	-1.7	1.2165	0.933234	-2.31113	1.69107	-0.718752	-0.704314	-1.35528	-0.238919	1.05457	0.552105	-0.173215	0.264836	-0.0693791	-1.20341	0.780304
p029	patient	f	38	12	n	n	severe	critical	24	1	average	-3.20727	-1.88214	-4.10117	0.578371	-1.99343	0.165321	0.588189	0.545562	1.55681	0.155864	-3.18652	1.45868	0.155931	0.784689	-2.86615	-0.110459	-0.534366	-0.834244	-0.124924	3.14105
p030	patient	f	64	12	n	n	nonsevere	mild	98	1	good	-0.329832	-0.179337	0.399523	-1.09719	-1.7	1.2165	-0.923712	1.18099	1.69107		0.805552	1.5163	0.796971	1.05457	0.552105	1.13347		1.47723	0.827084	-0.688835
p031	patient	m	71	12	n	n	severe	severe	104	1	average	1.28469	-1.06874	0.995039	-2.41944	-0.0101257	-1.41431	-0.589324	-2.84339	-0.136146		0.698141	-0.337106	-0.533973	-0.879052	0.565473	-0.361014	-0.0761915	-1.99087	-1.18863	0.918287
p032	patient	m	55	13	n	n	nonsevere	mild	101	0	good	-0.718234	-0.942695	-0.875678	-1.99981	-0.0589238	0.902993	0.756037	-0.873297	1.28932	-0.497299	-0.773314	-0.512197	-0.54185	-0.632085	0.339891	-1.19483	-0.310363	0.0826653	-0.00230485	-0.841761
p033	patient	f	56	15	n	n	severe	severe	88	0	average	-0.155987	0.224852	-1.10457	-4.47668	1.46613	0.902993	-0.973934	1.16857	-0.339234	-1.11298	-4.0988	0.873649	0.328964	0.526897	0.181404	-0.782866	1.10809	-1.76087	0.268672	0.704353
p034	patient	m	49	12	n	n	nonsevere	moderate	109	0	average	-0.466528	0.0387889	-1.87226	0.66941	-0.0910975	0.940206	-0.757742	-0.0666977	-0.11572		0.856495	1.12731	0.214202	0.641402	0.360862	1.07567	-0.993059	1.07231	3.1479	-0.570937
p035	patient	f	62	9	n	n	nonsevere	mild	41	0	poor	0.365676	1.01153	-0.99131	0.628804	0.0106401	-1.24126	-0.923712	-0.565067	-0.0953613	-0.146107	-0.3428	-1.01359	0.101691	-0.700474	-2.56372	-1.34571	-1.30466	-1.0663	-1.20119	1.95561
p036	patient	m	71	10	n	n	nonsevere	moderate	64	1	below average	-0.376089	-1.54293	1.13665	0.538317	-0.705452	-0.550578	-1.16865	-0.214526	-0.652219	-0.483973	-2.51437	-0.0718604	-1.52113	-1.34638	0.565473	-1.82572	4.72182	0.748286	-0.0348934	1.24525
p037	patient	f	49	15	n	n	nonsevere	mild	78	1	poor	-0.400142	0.0387889	-0.708866	0.669824	1.47825	-1.05258	-0.757742	-0.0666977	-0.11572	0.0877765	-1.04884	0.728541	-1.31373	0.375495	0.0865492	-0.808224	1.49875	-3.12055	0.507012	-0.291097
p038	patient	f	59		n	n	severe	severe	62	0	average	1.03879	0.808626	-0.121863	0.479217	-0.0589238	-1.56871	0.756037	-0.873297	1.28932	0.118382	-0.68049	1.23145	-0.447942	1.43467	0.400768	0.889828	-0.541804	1.19165	-0.716232	-0.400014
p039	patient	f	64	12	n	n	nonsevere	mild	56	0	above average	1.20029	-0.774773	0.798683	0.632467	0.0106401	-1.24126	0.933234	-0.565067	-0.0953613	-1.2914	-2.24211	-1.35528	-0.238919	-1.63729	0.552105	-1.4799	1.56833	1.47723	-0.72702	-0.688835
p040	patient	f	63	12	n	n	nonsevere	moderate	56	1	average	-1.58175	1.01153	0.399523	0.632467	0.0106401	1.2165	0.933234	-0.565067	-0.0953613	-3.00933	-0.704314	0.0937109	-0.238919	-0.964324	-1.06372	-1.4799	-0.763807	0.86662	-0.836985	4.30624
p041	patient	m	54	9	n	n	nonsevere	moderate	71	1	average	-1.49132	-0.942695	-0.417895	0.473558	0.449426	-1.56871	0.17938	-2.23454	-0.339234	-1.72866	0.861423	1.23145	-0.0528927	-0.283607	0.400768	0.31426	-1.93223	0.516553	-0.343668	0.483479
p042	patient	m	64	12	n	y	nonsevere	moderate	73	0	below average	-1.30354	-0.104344	-0.398798	0.632467	-1.7	-1.24126	0.933234		1.69107	-0.146107	0.805552	1.5163	-0.238919	-0.964324	0.552105	0.153455	-0.742791	-0.634528	-0.741346	-0.395007
p043	patient	m	41	16	n	n	nonsevere	moderate	56	0	below average	-2.25897	-0.59758	-0.843567	-1.85335	-1.66045	-0.388319	-1.28915	-1.78433		0.0877765	0.394165	-1.24812	-0.289907	0.965073	-3.86259	-0.154853	0.781163	-0.581154	1.10417	0.828264
p044	patient	f	48	12	n	n	nonsevere	moderate	82	0	average	-2.05981	-0.59758	-0.304762	-1.8605	-0.0910975	-1.05258	-0.757742	-0.0666977	0.454698	-1.23042	-2.24647	-0.67192	1.33485	-2.07145	0.360862	-1.487	2.3536	-1.82433	-1.33009	4.74603
p045	patient	m	50	9	n	y	nonsevere	moderate	110	1	average	-0.647953	-0.869171	-1.08379	0.473558	-0.0589238	-1.56871	0.756037	-0.873297	-1.96779	0.118382	-0.290003	1.23145	1.0624	0.383003	0.400768	1.09193	0.305398	-0.247254	-0.570486	0.262606
p046	patient	f	66	12	n	n	nonsevere	mild	51	2	average	-0.538485	-3.15651	0.798683	0.632467	-1.7	1.2165	0.933234	-2.31113	-1.8818	-0.146107	0.805552	0.0937109	-2.3107	-2.31026	0.552105	-1.80657	-1.01836	-0.634528	1.13708	-0.982662
p047	patient	m	41	12	n	n	severe	severe	111	0	average	0.263724	0.0387889	0.478988	0.66941	-0.0910975	-0.388319	-0.226336	1.07839	0.454698	-1.23042	-0.680769	1.12731	-0.935652	0.641402	0.360862	0.221449	-0.445739	-1.47718	-0.244436	-0.0112564
p048	patient	f	54	9	n	n	nonsevere	moderate	69	0	average	-0.296549	-0.358922	0.913894	0.473558	-1.58397	0.902993	-1.55059	-2.91516	-1.96779	-1.11298	0.861423	0.00481408	1.0624	-1.61683	0.400768	-0.463414	1.64618	-0.957126	-1.03985	0.925226
p049	patient	f	61	9	n	n	nonsevere	mild	81	0	average	-0.538485	-0.774773	0.206171	0.628804	1.72128	-1.24126	0.933234	-0.565067	-0.0953613	-2.43669	-1.8806	-1.01359	0.101691	-2.04641	0.552105	-1.67238	-0.47082	1.47723	-0.140433	-0.101179
p050	patient	m	46	12	n	n	nonsevere	mild	85	0	average	-0.798461	-0.59758	0.478988	0.66941	-1.66045	0.940206	0.836475	-0.0666977	1.59553	-1.23042	0.856495	1.12731	0.214202	-0.715025	0.360862	0.221449	1.09898	1.07231	1.20051	-0.850777
p051	patient	m	59	9	n	n	nonsevere	moderate	94	0	good	-0.296549	-2.11024	-6.41095	-4.48718	-1.58397	0.902993	0.756037		-0.339234	1.34974	-1.83192	-1.63954	-1.16819	-4.28327	-2.42195	-4.35179	-0.0336515	-2.48887	-0.697842	-0.841761
p052	patient	f	54	12	n	n	severe	severe	65	1	average	-0.366829	0.224852	0.570557	-4.48193	1.46613	0.902993	0.756037		-1.96779	0.734062	0.861423	1.23145	-0.419611	-1.21158	0.400768	-0.234303	-0.201576	0.0826653	0.001112	0.483479
p053	patient	f	61	9	n	n	severe	severe	54	0	poor	-1.99905	-2.56108	-0.19299	0.628804	-1.12978	-3.69901	-0.923712	-2.31113	-1.8818	-1.2914	-1.8806	-1.01359	-1.97009	-1.37344	0.552105	-1.67238	0.530488	-0.0693791	0.285655	5.18772
p054	patient	m	69	9	n	n	nonsevere	moderate	53	1	average	-1.23399	-0.774773	-0.19299	-4.56016	-1.12978	0.397245	-0.923712	-0.565067	-1.28632	-0.146107	0.805552	1.5163	0.101691	-1.37344	0.552105	-0.0390264	0.618212	-0.466281	-0.890595	-0.101179
p055	patient	f	56	11	n	n	nonsevere	moderate	28	1	average	-1.42104	-0.358922	-1.97858	0.47706	-1.58397	0.902993	0.756037	-2.23454	-0.339234	0.118382	0.861423	-0.253691	-1.41266	-0.457846	0.400768	-0.440286	-0.209354	-0.518305	-0.807771	0.262606
p056	patient	m	42	12	n	n	nonsevere	mild	88	0	above average	1.06036	-1.23395	0.478988	-1.8605	0.955135	0.275943	-0.226336	0.505848	1.02512	-1.23042	-0.680769	1.12731	-2.08551	-0.715025	0.360862	-1.05989	-0.501788	1.07231	-0.880995	-0.850777
p057	patient	f	43	15	n	n	severe	severe	91	1	average	-1.19678	0.675158	-1.49262	0.669824	-1.66045	-1.05258	0.836475	-1.21179	-0.11572	0.0877765	0.516857	-1.10407	-0.16388	0.375495	0.0865492	0.0460004	3.15337	-3.3298	-0.06474	0.548424
p058	patient	f	62	12	n	n	nonsevere	moderate	66	0	average	-2.83366	-1.76915	-4.19082	-1.09719	1.72128		0.933234	-0.565067	-0.69084	-1.2914	-2.24211	1.5163	-2.3107	-1.63729	0.552105	-1.4799	0.352582	0.175778	1.36087	1.36796
p059	patient	m	16	10	n	n	nonsevere	moderate	91	0	good	-0.83704	-1.18774	-1.08629	0.57578	-0.345708	0.924502	0.588189	0.545562	1.55681	-0.385119	1.00554	-2.18365	1.20114	0.247319	0.324204	0.651959	-0.241779	-2.05779	-0.562618	-0.914606
p060	patient	f	58	12	n	n	nonsevere	moderate	68	0	poor	-2.19413	0.224852	-5.42249	-4.48193	-1.58397	0.0790934	-0.397277	-0.873297	-1.42494		-2.1944	-0.382944	-0.419611	-1.21158	-2.65968	-1.78965	0.992473	0.0826653	-0.540125	2.69221
p061	patient	m	58	12	y	y	severe	critical	50	2	average	-2.05357	0.298376	-0.761232	0.0743362	-0.0589238	-0.744806	-1.55059	-2.23454	-0.339234	-2.96002	0.861423	1.23145	0.695682	-1.87819	0.400768	-0.62314	0.11847	-0.930611	1.25508	0.0417324
p062	patient	f	58	10	n	n	nonsevere	mild	80	0	above average	-1.5616	-0.942695	1.20993	0.475309	-0.0589238	0.902993	-0.973934	-2.91516	-0.339234	-0.497299	-3.49466	-0.124439	-1.29042	0.295884	0.400768	-1.42394	-0.438875	-0.518305	-0.230886	0.0417324
p063	patient	f	51	12	n	n	nonsevere	moderate	113	0	below average	-3.10778	-0.942695	-0.761232	-4.48193	-0.0589238	-1.56871	-0.973934	-0.873297	-0.339234	-0.497299	-2.1944	-0.382944	-2.6502	-1.21158	0.400768	-2.56733	-0.61669	-0.247254	-0.0321547	-0.400014
p064	patient	f	51	9	n	n	nonsevere	mild	81	0	average	0.968506	-0.358922	0.248	0.473558	-0.0589238	0.902993	0.756037	1.16857	-1.96779	-0.497299	0.861423	-1.63954	-0.0528927	-0.283607	0.400768	-0.0745774	0.441614	-0.518305	-0.33719	0.483479
p065	patient	m	53	10	n	n	nonsevere	moderate	73	0	good	-0.647953	0.224852	1.20993	0.475309	1.46613	-1.56871	-1.55059	-2.91516	-0.882086	-1.72866	-0.410831	-0.124439	0.940161	-1.70395	0.400768	-1.03511	1.1869	-1.47214	-0.542143	-0.620888
p066	patient	f	28	12	n	n	nonsevere	moderate	68	2	above average	-1.39474	0.201044	0.757354	-3.09295	-0.345708	-3.63058	0.588189	1.19186	-2.37489	-0.385119	1.00554	-0.501214	-0.916518	0.0571569	0.324204	-0.503353	1.60432	0.314522	-0.223902	0.211965
p067	patient	f	45	9	y	n	nonsevere	mild	55	1	good	0.330111	0.675158	1.23152	0.251499	1.47825	0.940206	0.836475	-0.0666977	1.59553	-0.571322	-0.312694	1.12731	-0.55757	1.29907	0.360862	1.25112	1.12489	-1.68779	-0.775558	0.268584
p068	patient	f	39	12	n	n	nonsevere	moderate	85	0	average	-1.39474	-1.18774	1.42378	-3.09295	0.203534	0.165321	0.588189	0.545562	-1.71961	0.696847	-1.07128	1.45868	1.20114	0.784689	0.324204	1.06822	-1.42981	-0.533358	0.402485	-0.689292
p069	patient	f	42	15	n	n	nonsevere	moderate	70	0	average	0.52927	-0.59758	-0.708866	0.669824	0.432019	-0.388319	0.305069	-0.639243	1.59553	-0.571322	-1.04884	0.728541	0.985974	0.375495	0.0865492	0.473113	-0.586236	-0.581154	0.941132	1.94762
p070	patient	f	56	11	n	n	severe	severe	88	1	average	-0.155987	0.808626	0.0191083	0.47706	-1.58397	-1.56871	-0.973934	-2.91516	-1.96779	1.96542	0.861423	1.23145	-0.297371	-1.12446	0.400768	-0.0514488	-0.439778	1.19165	-0.394265	0.925226
p071	patient	m	42	15	n	n	nonsevere	mild	53	1	below average	-0.732075	0.0387889	0.0748843	-1.85514	-0.0910975	-1.05258	-0.757742	-1.78433	-1.82697	0.0877765	0.516857	0.728541	-1.31373	0.375495	0.0865492	0.0460004	0.668956	1.07231	1.39794	1.1081
p072	patient	f	66	9	n	n	nonsevere	moderate	60	1	good	0.435227	-0.179337	0.206171	-2.8305	0.0106401	-0.422006	-0.30473	-0.565067	-1.8818	-1.2914	-0.3428	-1.01359	-0.934199	-1.37344	0.552105	-1.34571	0.578676	-0.788763	0.840965	-0.982662
p073	patient	f	65	13	n	n	nonsevere	moderate	76	0	below average	-2.83366	0.416098	0.33092	0.63275	0.0106401	1.2165	0.933234	0.0169529	-1.28632	-0.146107	-0.824819	1.4288	1.71932	0.966625	-1.10556	0.979847	-0.206214	1.47723	-0.470094	-0.395007
p074	patient	f	60	12	n	n	nonsevere	mild	95	1	average	-0.816688	-0.774773	0.000362422	-1.09719	1.15106	0.397245	-2.78066	1.18099	-0.0953613	-0.146107	0.805552	0.0937109	-0.238919	-0.964324	0.552105	-0.499886	0.0557759	-0.279974	0.149906	-0.101179
p075	patient	m	40	19	y	y	nonsevere	mild	106	0	above average	-1.32955	1.39168	-0.463921	-4.79046	0.955135	0.940206	0.836475	1.07839	1.02512	-0.571322	0.0260902	0.152337	-1.81784	-1.33548	-0.309824	-1.61164	1.20194	0.457575	-0.838689	-0.0112564
p076	patient	f	52	14	n	n	nonsevere	mild	87	0	average	1.39019	0.808626	1.00756	0.479217	-0.0589238	-1.56871	-0.973934	-0.873297	-0.339234	1.34974	-0.894141	-0.641449	-1.77938	-1.38581	0.260647	-2.15536	0.303099	0.516553	0.20358	-0.620888
p077	patient	m	48	16	n	n	nonsevere	moderate	34	0	average	0.330111	1.31153	-0.059817	-4.38326	-0.614214	0.275943	0.836475	0.505848	-1.25656	0.746875	0.394165	0.58449	0.859946	0.965073	-0.0125441	1.12648	-0.814588	1.07231	-0.232748	-0.291097
p078	patient	f	50	12	n	n	nonsevere	moderate	100	0	above average	-1.28048	-1.52647	-2.09302	0.478811	-0.0589238	0.902993	-0.973934	1.16857	-0.339234	-2.34434	-3.73631	-0.382944	0.695682	-1.21158	0.400768	-1.78965	2.13762	0.0826653	-0.186776	-0.400014
p079	patient	f	30	15	n	n	nonsevere	moderate	97	0	average	-0.418764	-0.49335	-0.988662	-4.92472	0.203534	0.924502	0.588189	-1.39333	-0.409038	0.155864	-1.56854	-0.971957	-0.1967	1.22698	0.095529	0.121043	-0.539108	-1.09271	-1.71318	3.36636
p080	patient	f	56	12	n	n	nonsevere	mild	81	1	average	-0.999357	0.808626	-0.761232	0.478811	-0.0589238	-1.56871	0.756037		-0.339234	-0.497299	-2.1944	1.23145	-0.419611	0.121645	0.400768	-0.234303	-1.11942	0.516553	1.33154	1.36697
p081	patient	m	40	11	y	n	severe	severe	69	0	average	-1.26317	1.31153	0.61369	-2.27484	-1.13733	-1.05258	-1.28915	0.505848	-0.686138	-1.23042	0.856495	1.12731	-0.809625	-0.626389	0.360862	-0.00481015	-0.926312	0.457575	-0.315041	-0.291097
p082	patient	f	61	12	n	n	nonsevere	moderate	67	0	below average	0.296126	1.01153	-1.19712	-1.09719	1.72128	1.2165	0.933234	1.18099	1.69107	1.57183	0.805552	0.0937109	-0.238919	-0.964324	0.552105	-0.499886	-0.173947	0.175778	0.22378	-0.688835
p083	patient	m	61	9	n	y	severe	severe	52	1	average	0.226575	1.08653	-2.18879	0.628804	-1.7	-1.24126	-0.923712	-2.31113	-1.8818	-1.2914	-0.3428	1.5163	-0.934199	-0.700474	0.552105	-0.0390264	-0.729195	-0.932101	-0.317883	1.36796
p084	patient	m	31	12	y	n	nonsevere	mild	84	0	average	0.487502	-1.18774	-0.630795	0.27903	-1.99343	0.924502	0.588189	-2.68593	1.55681	0.155864	1.00554	1.45868	1.20114	0.784689	0.324204	1.46112	0.863163	-2.81929	-1.46638	-0.914606
p085	patient	m	51	16	n	n	nonsevere	moderate	72	0	average	-0.155987	0.224852	0.778669	0.479217	-0.567273	-0.744806	-0.973934	-0.873297	-1.42494	-1.11298	-1.1358	0.744396	0.206725	-0.893443	0.102161	-0.576883	-0.312856	1.19165	1.41373	0.483479
p086	patient	f	48	15	n	n	nonsevere	moderate	41	0	average	-0.200982	-1.87032	-1.49262	0.669824	-0.0910975	0.940206	-0.226336	-1.21179	-0.11572	0.0877765	-1.04884	-1.10407	0.985974	0.375495	0.0865492	0.0460004	-0.292071	0.0657559	1.25681	0.268584
p087	patient	f	50	9	n	n	nonsevere	moderate	86	1	average	-1.2102		0.913894								-1.83192	0.00481408	-1.16819	0.383003	0.400768	-0.463414	1.09928			-0.620888
p088	patient	f	42	16	n	n	nonsevere	moderate	77	1	average	-0.599302	0.675158	-0.059817	-1.85335	0.432019	0.275943	-0.226336	1.07839	-1.82697	0.0877765	-1.17154	0.58449	-0.289907	-0.391355	-0.0125441	-1.00908	0.644324	1.07231	1.35052	1.66778
p089	patient	f	50	12	n	n	nonsevere	moderate	77	1	average	-0.226268	-0.942695	1.20993	0.478811	-0.0589238	0.902993	0.756037	-0.873297	1.28932	-1.11298	-0.652486	1.23145	0.695682	0.788255	0.400768	0.932208	-1.7217	-0.247254	-0.362922	2.91309
p090	patient	m	51	15	y	y	severe	severe	67	0	average	-1.63188	-0.285397	0.22722	-2.40078	-0.567273	-2.3926	0.17938	-1.55392	1.28932	-1.11298	0.526945	0.873649	0.328964	0.526897	0.181404	0.772483	-0.496517	0.104247	-0.910931	2.69221
p091	patient	f	48	12	n	n	severe	critical	96	0	average	-1.86065	0.0387889	0.478988	0.66941	-0.0910975	0.940206	-2.35196	-0.0666977	-0.11572	-1.23042	0.856495	1.12731	0.214202	0.641402	0.360862	1.07567	-0.0440398	-1.07305	-1.28396	3.62667
p092	patient	f	47	16	n	n	nonsevere	mild	84	0	above average	-0.665688	-0.59758	-0.843567	0.669824	-1.66045	0.940206	0.836475	0.505848	-0.11572	0.0877765	0.394165	-1.24812	-0.289907	0.286859	-0.0125441	-0.154853	-0.425347	1.07231	-1.40351	-0.850777
p093	patient	f	30	16	n	n	nonsevere	mild	88	0	average	0.766353	1.58983	-0.413876	0.578672	-1.44419	-0.593859	-0.168395	-0.100736	-0.409038	1.23783	0.380943	0.867393	0.758206	0.404364	0.0129222	0.722069	-1.24357	-0.533358	-0.779902	-0.914606
p094	patient	f	49	15	n	n	nonsevere	moderate	99	0	average	-0.200982	0.0387889	-0.708866	0.669824	-0.0910975	-1.05258	0.836475	-0.0666977	1.59553	-1.23042	0.516857	0.728541	-1.31373	-0.980933	0.0865492	-0.808224	-0.435229	-3.12055	-0.589238	0.548424
p095	patient	m	50	20	n	n	severe	severe	88	0	good	-1.63188	0.224852	-1.6768	0.479217	0.957776	0.902993	0.756037	1.16857	-0.882086	0.734062	-0.0771935	0.227386	-1.39753	0.0912999	-0.214812	-0.530626	-0.0883454	1.19165	-0.165371	-0.841761
p096	patient	f	25	16	n	n	nonsevere	moderate	100	0	average	-0.418764	-0.49335	0.280198	0.578672	-0.89495	0.165321	0.588189	-0.747035	0.246246	0.155864	0.380943	-1.12887	-0.314243	0.404364	0.0129222	-0.0637195	-0.630168	-2.05779	-1.27879	0.211965
p097	patient	f	30	15	n	n	nonsevere	mild	80	0	above average	-0.349051	-0.49335	1.09356	0.578672	1.30202	0.924502	0.588189	1.19186	1.55681	2.3198	0.546698	-0.971957	-0.1967	1.22698	0.095529	0.513937	1.61493	-1.32137	-0.549635	-0.238663
p098	patient	f	53	10	n	n	nonsevere	moderate	95	0	average	1.46047	0.224852	0.799449	0.475309	-0.0589238	0.902993	0.756037	1.16857	-0.339234	0.118382	0.861423	1.23145	0.940161	1.43467	0.400768	1.68675	-1.16772	1.19165	-0.696301	-0.620888
p099	patient	m	57	26	n	n	severe	severe	99	0	average	-1.49132	-0.358922	-1.03168	0.479217	0.957776	0.0790934	-0.397277	0.487946	-0.339234	-0.497299	-2.34407	-0.54813	-1.01567	-1.09803	-0.690272	-2.01659	0.944529	0.0826653	0.411899	-0.620888
p100	patient	m	53	16	y	n	severe	severe	85	0	average	-0.0154253	0.224852	0.112774	0.0813403	-0.567273	0.0790934	0.756037	-0.192676	-0.339234	-1.72866	0.406117	0.744396	1.32202	1.10639	0.102161	1.3673	-0.0553732	0.104247	0.303235	-0.620888
p101	patient	f	36	17	n	n	nonsevere	mild	101	0	good	1.11492	0.895438	0.854984	0.578672	-1.44419	-1.35304	-0.168395	-0.747035	-1.71961	-0.926102	0.215188	0.710478	-0.431787	0.309282	-0.0696847	0.144413	-0.0232435	-0.533358	-0.371777	-0.463977
p102	patient	f	45	15	n	n	nonsevere	moderate	108	0	average	0.52927	0.675158	0.0748843	-1.85514	-0.0910975	-0.388319	-1.82055	-1.21179	-0.11572	0.746875	-2.61454	-1.10407	-1.31373	1.05371	0.0865492	-0.808224	4.34573	-1.07305	-0.0836506	-0.0112564
p103	patient	f	58	14	n	n	nonsevere	moderate	76	0	average	-2.40497	-1.52647	-0.324229	-1.99806	-0.0589238	-1.56871	-0.973934	-0.873297	-1.96779		0.647772	-2.05725	-0.664089	-2.05243	0.260647	-2.15536		-1.62052	0.394944	1.36697
p104	patient	m	36	16	n	n	nonsevere	moderate	86	0	poor	-0.139913	-0.49335	-1.10795	0.578672	-0.345708	-0.593859	-0.168395	-1.39333	-0.409038	0.155864	0.380943	0.867393	0.758206	0.404364	0.0129222	0.722069	-0.401194	-1.32137	0.540933	-0.238663
p105	patient	f	63	9	n	n	severe	critical	27	0	above average	-0.95579	-0.774773	-1.39047	0.628804	0.0106401	-1.24126	-0.923712	1.18099	-0.0953613	-1.2914	-0.3428	-1.01359	-1.97009	-1.37344	0.552105	-1.67238	-3.19873	0.474181	0.05493	5.77537
p106	patient	m	64	9	n	n	nonsevere	mild	83	0	below average	2.73041	1.60697	0.206171	0.628804	-1.12978	-2.87976	0.933234	-1.72911	-0.0953613	-1.2914	-0.3428	1.5163	0.101691	1.31843	0.552105	1.26766		0.474181	1.33923	-0.688835
p107	patient	m	49	15	n	n	nonsevere	moderate	59	0	poor	-0.0682088	-2.50669	-0.708866	-1.85514	-0.614214	0.940206	-0.757742	-1.21179	-1.25656	-3.20772	-1.04884	-1.10407	-0.16388	-2.33736	-3.76349	-2.51667	4.84877	-0.581154	0.282297	-0.0112564
p108	patient	m	51	15	n	y	nonsevere	mild	83	0	average	-0.0154253	0.88215	0.22722	-1.99631	-1.58397	0.902993	0.756037	-0.873297	-0.339234	-0.497299	-1.01497	0.873649	-0.786329	1.19351	0.181404	0.383646	0.972536	1.19165	0.306352	-0.620888
p109	patient	m	51	12	n	n	nonsevere	moderate	82	0	poor	-0.0857061	-1.52647	-2.75892	0.478811	1.46613	0.902993	-1.55059	-0.192676	0.74647	-0.497299	0.861423	-2.0273	1.78264	-0.544965	0.400768	0.154534	-0.651281	1.19165	0.645783	0.925226
p110	patient	f	65	12	n	n	nonsevere	moderate	66	1	poor	-2.13815	-0.179337	-3.19292	-2.82684	0.0106401	1.2165	-0.923712	-0.565067	-1.8818	-0.718752	-0.704314	1.5163	1.80655	1.05457	0.552105	1.46014	-0.742167	0.474181	0.421478	0.486476
p111	patient	f	40	16	n	n	nonsevere	mild	52	0	below average	-1.79426	1.9479	0.723933	-4.38326	0.432019	0.275943	0.305069	1.65094	0.454698	-3.20772	0.394165	-1.24812	0.859946	-0.391355	-0.0125441	-0.154853	0.255353	-1.07305	-2.33088	0.828264
p112	patient	f	61	13	n	n	nonsevere	moderate	107	1	average	0.157024	1.60697	0.73008																	-0.395007
p113	patient	f	54	8	n	n	severe	severe	52	0	poor	-3.10778	-1.9176	-7.29534	-2.00856	-1.07562	-0.744806	-0.397277	-2.23454	-1.96779		-0.169176	1.23145	1.78264	-0.196488	0.400768	1.27479	-0.454852	-1.89421	-0.370652	-0.179141
p114	patient	m	52	15	y	y	nonsevere	mild	75	1	average	-1.35076	-0.869171	-1.10457	0.0795893	-0.0589238	0.902993	0.756037	1.16857		0.118382	-1.01497	-0.770702	-1.90162	-0.806324	0.181404	-1.56054	-0.539861	-0.329641	-1.06332	0.0417324
p115	patient	f	59	12	n	n	nonsevere	mild	78	0	above average	-0.999357	0.224852	-6.08839	0.478811	1.46613	0.902993	0.756037	-0.192676	0.74647	0.118382	0.861423	-2.0273	-0.419611	0.788255	0.400768	0.154534	-0.40947	1.19165	-0.500682	-0.620888
p116	patient	f	51	9	n	n	nonsevere	mild	85	0	below average	0.195417	-2.69402	0.913894	-4.48718	-0.0589238	0.902993	0.756037	-1.55392	-0.339234	0.118382	-0.290003	1.23145	1.0624	-0.283607	0.400768	0.703097	-1.72491	0.0826653	-0.0297998	-0.400014
p117	patient	f	37	16	n	n	nonsevere	mild	76	1	poor	-1.74331	0.895438	-1.80202	0.578672	-0.89495	0.924502	0.588189	-0.747035	1.55681	0.696847	0.380943	0.867393	0.758206	0.404364	0.0129222	0.722069	-0.542611	0.314522	-0.915323	-0.463977
p118	patient	f	64	12	n	n	nonsevere	moderate	45	1	below average	-2.13815	-1.37021	-1.19712	0.632467	-1.7	-1.24126	-2.78066	-0.565067		-1.86404	0.805552	0.0937109	-4.38248	-0.964324	-1.06372	-1.80657	3.8415	-0.788763	0.0333022	2.24944
p119	patient	f	64	14	n	n	nonsevere	mild	85	0	good	-1.6513	-0.774773	-0.136843	0.63275	0.0106401	-1.24126	0.933234	0.0169529	-0.69084	-0.146107	0.592472	-1.38167	-0.465992	-0.467258	0.478125	-0.480455	0.0393509	-1.42927	-1.12761	-0.395007
p120	patient	m	63	15	n	n	nonsevere	mild	86	0	average	1.06119	1.01153	-1.40293	0.63275	-1.7	-1.24126	-0.923712	-0.565067	-1.8818	0.426538	0.471967	1.20101	-0.579528	0.790725	0.436287	0.672608	0.0776001	0.474181	-0.0768075	-0.982662
p121	patient	f	63	12	n	n	nonsevere	moderate	105	3	average	-0.608036	-0.774773	-0.398798	0.632467	0.0106401	-1.24126	-0.30473	0.0169529	0.500117	-1.2914	-0.704314	-1.35528	-0.238919	1.05457	0.552105	-0.173215	-0.291574	0.474181	1.73906	-0.688835
p122	patient	f	66	14	n	n	nonsevere	mild	56	1	average	0.782982	0.416098	0.262317	0.63275	0.0106401	0.397245	0.314252	-0.565067	0.500117	-0.146107	0.592472	-1.38167	-0.465992	1.55164	0.478125	0.172886	0.7344	0.175778	-0.866455	0.192648
p123	patient	m	50	15	n	n	severe	severe	38	1	good	0.546821	0.224852	-1.10457	-1.99631	-1.58397	-1.56871	-2.70391	-0.873297	-0.339234	0.734062	0.526945	-0.770702	-0.786329	1.19351	0.181404	0.383646	1.34283	-0.247254	-0.293877	-0.400014
p124	patient	m	57	12	n	n	nonsevere	mild	89	0	average	-1.35076	-0.942695	-0.0953374	0.478811	-0.0589238	0.902993	0.756037	-0.873297	1.28932	-0.497299	0.861423	-0.382944	-0.419611	0.121645	0.400768	0.154534	-0.91291	1.19165	-0.165876	-0.400014
p125	patient	m	67	15	n	n	severe	severe	95	0	average	-0.886239	1.01153	0.592875	-1.09352	0.580852	-1.24126	-0.923712	-1.14709	-0.0953613	-0.718752	-1.06583	1.20101	0.456361	-1.22817	-1.18923	-0.634075	-0.602055	0.474181	-0.784863	-0.395007
p126	patient	f	66	12	n	n	nonsevere	mild	85	0	poor	-1.02534		-0.398798	0.632467	0.0106401	1.2165	-0.923712	0.0169529	-0.0953613	-0.718752	-0.704314	1.5163	-1.27481	-0.964324	0.552105	-0.499886	-1.68708	0.86662	0.25475	-0.395007
p127	patient	f	57	14	y	y	nonsevere	moderate	92	0	good	-0.577672	-0.869171	1.00756	0.0778382	-0.0589238	-0.744806	0.756037	-0.873297	0.203618	0.734062	0.647772	1.0029	1.5665	1.28063	0.260647	1.34417	-0.740183	0.104247	-1.13699	-0.400014
p128	patient	f	52	12	n	n	nonsevere	mild	41	1	below average	-1.2102	0.224852	-0.0953374	0.478811	-0.0589238	-1.56871	0.17938	-0.873297	0.203618	0.118382	0.861423	-2.0273	-1.5349	1.43467	0.400768	-0.234303	-0.958952	-1.31367	0.584837	-0.400014
p129	patient	m	35	12	n	y	nonsevere	mild	77	0	average	-1.60388	1.58983	1.42378	-1.25729	-0.345708	0.924502	0.588189	-0.747035	-2.37489	-0.385119	1.00554	1.45868	1.20114	1.49018	0.324204	1.81119	-0.795987	-1.09271	-1.33443	-0.0133492
p130	patient	f	60	11	n	n	nonsevere	moderate	88	0	average	0.0874729	1.01153	0.867285	0.631246	0.0106401		-2.78066	-2.31113	1.0956	-2.43669	-2.12161	1.5163	-0.125382	-2.22231	0.552105	-1.32628	2.89317	-0.932101	-1.17738	0.486476
p131	patient	f	55	12	n	n	nonsevere	mild	78	0	average	-0.366829	-0.358922	1.20993	0.478811	-0.0589238	0.902993	0.756037	1.16857	-0.339234	-1.11298	-0.652486	-2.0273	-1.5349	-1.21158	-2.65968	-2.95616	0.814536	0.0826653	0.543772	-0.620888
p132	patient	m	31	16	n	n	severe	severe	65	0	average	-1.46446	0.201044	-0.413876	0.578672	-1.44419	-0.593859	-0.168395	-0.747035	0.246246	1.23783	0.380943	0.867393	-1.38669	-1.0507	0.0129222	-0.849507	-0.0302967	-1.09271	-1.30971	-0.238663
p133	patient	f	48	12	n	n	nonsevere	mild	77	0	average	-1.79426	0.0387889	0.478988	0.66941	0.955135	0.940206	0.836475	1.07839	1.59553	-0.571322	-0.680769	-0.67192	1.33485	1.29907	0.360862	1.07567	-0.392316	-1.47718	1.70863	-0.0112564
p134	patient	f	66	27	n	n	severe	severe	71	0	below average	-1.7904	-1.96564	-3.42364	-1.07887	0.0106401			-0.565067		-0.718752	-0.974093	-0.165746	-1.94197	-0.264676	-0.0657685	-1.17083	-1.77547	-0.279974	-0.91019	0.192648
p135	patient	f	67	12	n	n	severe	severe	76	1	poor	-1.16444			-2.82684	-1.12978	-2.87976	-0.30473	-0.565067	-1.28632		-2.24211	0.0937109	-0.238919	-0.964324	-2.68924	-1.80657	3.63826	0.175778	0.477054	-0.101179
p136	patient	m	35	16	n	n	nonsevere	mild	96	0	above average	-1.60388	0.895438	0.974273	-1.2521	-1.99343	-1.35304	-0.168395	-0.747035	-0.409038	-2.00807	0.380943	0.867393	-0.314243	1.1319	0.0129222	0.722069	1.37514	-0.533358	0.866185	-0.463977
p137	patient	f	68	9	n	n	nonsevere	mild	92	1	average	-1.23399	0.416098	1.18194	-2.8305	-1.7	0.397245	-2.78066	-1.72911	-0.69084	-1.86404	0.805552	1.5163	1.80655	1.70716	0.552105	2.07788	3.45289	-0.932101	0.755002	-0.101179
p138	patient	m	57	12	n	y	severe	severe	58	0	good	-1.2102	-0.869171	-0.0953374	-4.48193	-1.07562	-2.3926	0.756037	-2.23454	1.28932	0.118382	-0.652486	-0.382944	0.695682	0.121645	0.400768	-0.234303	-0.333575	1.19165	0.29544	-0.620888
p139	patient	f	54	6	n	n	nonsevere	mild	58	0	poor	-3.10778	-1.9176	-7.06645	0.468305	-1.58397	-1.56871	-2.70391	-2.91516	-1.96779	-1.11298	0.0724798	-1.25178	0.313825	0.644362	-2.18422	-0.303689	-0.153117	-0.751142	-0.416684	2.69221
p140	patient	m	36	12	y	n	nonsevere	moderate	87	0	average	-0.83704	1.58983	1.42378	0.27903	-0.345708	0.924502		-1.39333	0.90153	1.23783	1.00554	1.45868	0.155931	0.784689	0.324204	1.06822	-0.305602	-0.143167	2.68426	-0.689292
p141	patient	m	55	11	n	y	nonsevere	mild	89	2	below average	-0.155987	0.88215	1.20993	-6.96405	-0.0589238	-1.56871	-0.973934	-0.873297		-1.72866	-0.531658	1.23145	0.817921	0.875375	0.400768	1.11506	-1.65093	0.0826653	-0.400505	-0.841761
p142	patient	m	69	12	n	y	nonsevere	mild	56	1	average	-2.27726	0.491091	0.798683	-1.09719	0.0106401	-0.422006	-0.923712	-0.565067	-0.0953613	-2.43669	-0.704314	0.0937109	0.796971	-0.291358	0.552105	0.153455	2.37793	-0.932101	-0.569657	-0.982662
p143	patient	f	68	15	n	n	nonsevere	moderate	56	3	average	-0.0516288	-1.96564	-0.205446																	-0.395007
p144	patient	m	53	13	y	y	nonsevere	moderate	73	2	average	0.687383	-0.285397	-0.209783	-2.40428	0.449426	0.0790934	-1.55059	-1.55392	0.203618	0.118382	0.7686	-0.512197	0.573443	0.701136	0.339891	0.749354	-1.31963	0.779348	1.38519	-0.400014
p145	patient	m	67	9	n	n	nonsevere	moderate	105	4	above average	0.0874729	1.60697	1.18194	-2.8305	-1.7	1.2165	0.933234	-2.31113	1.69107	-0.718752	-0.3428	0.4354	-0.934199	1.31843	0.552105	0.287644	0.588191	1.47723	-0.421972	-0.982662
p146	patient	f	66	12	n	n	nonsevere	moderate	103	1	good	0.0874729	0.416098	1.18194	0.632467	-1.7	-1.24126	-0.923712	-2.31113	-1.8818	0.426538	0.805552	0.0937109	0.796971	0.381609	0.552105	0.806797	-0.957868	-0.0693791	-0.652535	-0.982662
p147	patient	m	47	15	n	n	nonsevere	moderate	92	1	above average	-1.5951	0.675158	0.858635	0.669824	-0.614214	0.940206	0.836475	-0.0666977	-0.686138	-0.571322	0.516857	-1.10407	-2.46359	-0.980933	0.0865492	-1.66245	4.56294	-0.581154	-0.335104	-0.291097
p148	patient	m	64	12	n	n	nonsevere	moderate	74	0	average	-1.3731	1.01153	1.18194	0.632467	-1.12978	-0.422006	-2.78066	-1.72911	-0.69084	-0.146107	0.805552	1.5163	-0.238919	1.70716	0.552105	1.46014	-1.12514	1.47723	0.779261	-0.395007
p149	patient	m	68	9	n	n	severe	severe	93	1	average	0.0874729	-0.179337	1.00449	-2.8305	1.72128	1.2165	-0.923712	-0.565067	-1.8818	-0.146107	-0.3428	1.5163	1.13758	-2.04641	0.552105	-0.0390264	0.164753	0.175778	0.442086	-0.395007
p150	patient	f	52	12	n	n	severe	critical	65	0	average	-1.63188	-1.52647	-2.09302	0.478811			-0.397277			-0.497299	0.861423	-0.382944	-0.419611	-0.544965	0.400768	-0.234303	-1.17426	-0.751142	-0.542817	0.0417324
p151	patient	f	50	12	n	n	nonsevere	mild	73	0	average	-0.858795	0.224852	0.570557	0.478811	-0.0589238	0.902993	0.756037	-0.192676	-0.339234	-1.11298	-0.652486	1.23145	-1.5349	-0.544965	0.400768	-1.01198	-0.146825			-0.400014
p152	patient	m	56	8	n	n	nonsevere	mild	53	0	poor	-0.718234	-0.942695	-3.63292	-2.00856	-1.58397	0.902993		-2.91516	-0.339234	-1.72866	-0.169176	-1.51028	-2.16124	-1.52971	0.400768	-1.83591	-0.129457	0.516553	0.263084	-0.179141
p153	patient	f	62	12	n	n	severe	severe	74	0	average	-2.83366	-1.96564	-3.19292	-2.82684	0.0106401	-1.24126	0.933234	-0.565067	-0.0953613	-0.718752	0.805552	0.0937109	-2.3107	-3.65619	0.552105	-2.45991	0.545045	-1.19324	-0.160035	6.95069
p154	patient	f	62	14	n	n	nonsevere	moderate	118	0	good	-0.747137	0.416098	-0.536003	0.63275	0.0106401	-1.24126	0.933234	-0.565067	-0.0953613	0.426538	0.592472	-0.134082	-0.465992	0.205708	0.478125	-0.153785	-0.364088	-1.19324	-1.46406	-0.101179
p155	patient	m	36	16	n	n	severe	severe	100	0	average	-1.46446	-2.57653	0.280198	0.578672	-1.44419	0.924502	0.588189	0.545562	0.246246	-0.926102	-1.7343	0.867393	-1.38669	0.404364	0.0129222	-0.456613	-0.013956	1.06393	-0.11018	0.437279
p156	patient	f	36	12	n	n	nonsevere	moderate	126	0	above average	-0.418764	0.201044	0.0632797	0.578371	-0.345708	-0.593859	0.588189	-0.747035	0.246246	-1.46709	1.00554	-0.501214	0.155931	0.784689	0.324204	0.675329	0.0268044	-0.167124	-0.973395	-0.689292
p157	patient	f	35	15	n	n	nonsevere	mild	70	0	poor	-0.83704	-1.18774	1.09356	-1.2534	-0.89495	-0.593859	0.588189	-0.747035	-1.06432	1.23783	0.546698	1.02431	0.87575	-0.955619	0.095529	0.121043	-1.1905	1.06393	0.488745	-0.0133492
p158	patient	f	37	19	n	n	nonsevere	mild	100	0	good	-0.767328	-0.49335	-0.0776687	-1.24822	-1.99343	0.165321	0.588189	-0.747035	-1.71961	-0.926102	-0.116322	0.396649	0.405575	0.11912	-0.234898	0.167782	1.5589	1.06393	1.73458	-0.0133492
p159	patient	f	57	12	n	n	nonsevere	mild	61	1	average	-1.91301	-0.942695	0.570557	-2.00156	-1.58397	0.902993	-2.70391	-0.873297	-1.96779	-1.11298	0.861423	-0.382944	-1.5349	-2.5448	0.400768	-2.17849	-0.748499	-1.47214	-0.735408	-0.400014
p160	patient	f	29	22	n	n	nonsevere	mild	50	0	poor	-0.767328	0.201044	-1.12961							0.155864							0.657262	1.06393	-0.939405	-0.238663
p161	patient	f	39	16	n	n	nonsevere	moderate	113	0	average	-1.11589	-1.18774	0.280198	0.578672	-0.89495	-0.593859	-1.68156	-0.747035	-1.06432	1.23783	0.380943	0.867393	-0.314243	1.1319	0.0129222	0.722069	-1.72786	1.06393	-0.534219	-0.914606
p162	patient	f	42	15	n	n	nonsevere	mild	99	0	average	-0.931235	0.0387889	0.858635	0.669824	-1.66045	-1.05258	-0.757742	-1.78433	-1.82697	0.746875	0.516857	-1.10407	-0.16388	-1.65915	0.0865492	-1.23534	-0.525026	-1.82433	-0.461099	0.828264
p163	patient	f	42	15	n	n	nonsevere	mild	99	0	average	-1.46233	0.675158	0.858635	0.669824	-1.66045	0.940206	-0.757742	-0.0666977	-0.11572	0.0877765	-1.04884	-1.10407	0.985974	0.375495	0.0865492	0.0460004	-0.459711	1.07231	0.721889	-0.850777
p164	patient	f	59	12	n	n	nonsevere	moderate	58	0	average	0.757664	1.3924	0.570557	-4.48193	0.449426	0.0790934	0.756037	1.16857	-1.42494	-1.11298	-0.652486	-0.382944	0.695682	-0.544965	0.400768	-0.234303	0.706946	0.516553	-0.708075	1.80872
p165	patient	m	45	15	n	n	nonsevere	mild	92	0	poor	-0.864848	-0.59758	0.858635	0.669824	-0.614214	0.275943	-1.82055	0.505848	-0.11572	-0.571322	0.516857	-1.10407	-1.31373	0.375495	0.0865492	-0.381112		1.07231	-0.650763	-0.0112564
p166	patient	f	63	12	n	n	nonsevere	mild	78	1	poor	-1.09489	-0.179337	1.18194	0.632467	0.0106401	-0.422006	0.933234	-0.565067	-0.0953613	-0.718752	-2.24211	0.0937109	-1.27481	0.381609	0.552105	-0.826557	-0.631239	-0.0693791	-0.569949	6.0692
p167	patient	f	45	12	n	n	nonsevere	moderate	64	0	above average	-1.32955	1.31153	-1.87226	0.66941	-0.0910975	0.940206	0.836475	-1.21179	-0.686138	2.06507	-0.680769	-0.67192	-0.935652	-1.39324	0.360862	-1.487	-0.825251	1.07231	-0.213676	0.828264
p168	patient	f	65	14	n	n	nonsevere	moderate	62	1	above average	0.782982	1.01153	0.262317	0.63275	0.580852	-1.24126	-2.16168	-0.565067	-0.69084	1.57183	0.592472	-0.134082	0.569898	1.55164	0.478125	1.1529	0.219138	1.47723	-0.5694	-0.101179
p169	patient	m	32	9	n	n	nonsevere	mild	95	1	poor	-1.04618	-1.88214	-0.272928	0.574484	-1.44419	-1.35304	0.588189	-1.39333	-0.409038	0.155864	-4.8045	-0.0304701	-0.563888	-1.8402	-2.61833	-2.30643	-3.53154	0.314522	0.901929	3.14105
p170	patient	m	54	9	n	n	nonsevere	moderate	67	1	below average	-2.05357	-0.942695	-1.74968	-4.48718	1.46613	0.902993	-0.973934	-0.873297	1.28932	-0.497299	0.861423	-1.63954	-1.16819	-1.61683	0.400768	-1.62993	-0.0161365	0.0826653	0.468325	0.925226
p171	patient	f	68	12	n	n	nonsevere	moderate	73	3	poor	-1.58175	-0.179337	0.798683	0.632467	0.0106401	1.2165	0.314252	0.0169529	-0.0953613		-2.24211	-1.35528	-1.27481	-0.964324	0.552105	-1.80657	2.40251	-0.788763	0.0496816	4.30624
p172	patient	m	70	15	n	n	nonsevere	moderate	17	0	average	0.235776	0.828035	1.1946	0.542983	0.6852	1.1769	1.14867	2.41434	1.41207	1.30342	0.316317	-0.734973	0.314615	0.138293	0.434351	0.212393	0.293815	1.92956	0.548881	0.264367
p173	patient	f	66	8	n	n	nonsevere	mild	68	1	average	-2.83366	1.60697	1.18194	0.627583	0.0106401	-1.24126	0.933234	1.18099	-1.8818	0.426538	0.805552	0.549296	0.215227	0.0604426	0.552105	0.441264	-1.50066	0.474181	-0.876583	-0.395007
p174	patient	f	57	5	n	n	nonsevere	mild	68	0	average	-0.296549	-0.358922	-0.626006	-2.01382	-1.58397	-1.56871	-0.973934	-2.91516	1.28932	-0.497299	0.193307	0.521825	-0.679228	1.39809	0.400768	0.268002	-0.381406	0.516553	-0.581522	4.01745
p175	patient	f	34	16	n	n	nonsevere	moderate	94	0	average	-0.558189	-0.49335	0.280198	0.578672	0.203534	0.165321	-2.43815	-0.747035	0.246246	0.155864	0.380943	0.867393	0.758206	0.404364	0.0129222	0.722069	1.7506	-0.533358	-0.258422	3.36636
p176	patient	m	26	14	n	n	nonsevere	moderate	98	0	above average	-1.95244	0.201044	0.518776	0.578672	-0.345708	0.924502	0.588189	-0.747035	1.55681	0.155864	-3.51803	-0.815043	0.993293	-0.860538	0.178136	-1.26577	-0.354795	-0.834244	-0.677337	-0.238663
p177	patient	f	62	7	n	n	nonsevere	mild	78	0	average	-0.886239	0.416098	0.742536	-1.10329	-1.7	-1.24126	-2.78066	-0.565067	-1.8818	0.999183	-0.10179	0.663192	0.328764	-0.524574	0.552105	0.268213	-0.473483	0.86662	-0.665335	-0.395007
p178	patient	f	62	12	n	n	nonsevere	mild	70	0	average	-1.5122	-1.96564	0.399523	-2.82684	-0.559572	-1.24126	0.933234	-0.565067	-1.8818	-0.718752	-0.704314	0.0937109	-1.27481	-0.964324	0.552105	-1.15323		-1.0663	-0.818096	-0.688835
p179	patient	f	70	9	n	n	nonsevere	moderate	60	5	average	0.148366	-0.120352	0.795479																	-0.389552
p180	patient	f	34	9	n	n	nonsevere	mild	15	0	average	-1.39474	0.201044	0.421147	-3.09683	-1.99343	0.924502	0.588189	1.19186	-2.37489	-0.385119	-0.574015	-0.0304701	-0.563888	1.06993	0.324204	-0.341961	0.411781	-0.167124	1.33255	-0.914606
p181	patient	m	57	12	n	n	nonsevere	moderate	71	0	average	0.125136	1.3924	-1.42713							-0.497299	-0.652486	1.23145	0.695682	0.788255	0.400768	0.932208	-0.123985	0.0826653	-0.844235	3.13396
p182	patient	f	43	15	n	n	nonsevere	moderate	39	0	average	-1.5951	-0.59758	0.858635	-1.85514	-1.66045	0.940206	-2.35196	-0.0666977	-0.11572		0.516857	-1.10407	0.985974	-0.980933	0.0865492	-0.808224	-0.516858	-2.13145	-1.5122	4.46619
p183	patient	f	66	12	n	n	severe	severe	63	0	poor	-2.83366	1.01153	-1.59628	-4.55649	-1.7	-1.24126	0.933234	-0.565067	-1.8818	-0.718752	0.805552	1.5163	0.796971	-0.291358	0.552105	0.480126	0.0871552	0.474181	-0.513122	4.01241
p184	patient	m	39	18	n	n	nonsevere	mild	17	0	average	-0.279338	-1.18774	0.735695	0.578672	-0.89495	-1.35304	-1.68156	-1.39333	0.246246	-0.385119	0.0494331	0.553564	0.523119	0.941733	-0.152292	0.745438	-0.169129	-0.167124	-0.635332	1.11322
p185	patient	f	48	16	n	n	nonsevere	moderate	44	0	average	-1.13039	-0.59758	-0.059817	0.669824	-1.66045	0.275943	0.305069	-0.0666977	1.02512	-1.88952	0.394165	0.58449	-0.289907	-1.06957	-0.0125441	-0.581965	1.06128	-2.13145	-0.869576	-0.570937
p186	patient	f	50	15	n	n	nonsevere	moderate	124	0	average	-0.858795	-0.942695	-0.438675	0.479217	-0.0589238	0.902993	0.756037	-0.873297	-1.42494	-2.34434	0.526945	0.873649	0.328964	-0.139713	0.181404	0.383646	0.426383	-0.247254	-0.120636	-0.620888
p187	patient	f	47	9	n	n	nonsevere	moderate	94	0	good	-0.997621	0.0387889	0.883092	0.664052	-1.66045	0.940206	0.836475	1.65094	1.59553	1.40597	-0.312694	1.12731	-0.55757	1.29907	0.360862	1.25112	-0.000863386	-1.07305	0.21428	0.268584
p188	patient	f	47	9	n	n	nonsevere	mild	77	0	below average	-1.26317	0.675158	0.0993422	0.664052	0.432019	0.940206	0.836475	0.505848	-0.11572	-0.571322	-0.312694	-0.239767	-0.55757	0.90731	0.360862	0.396897	1.89053	-3.52861	-0.692195	2.50731
p189	patient	f	55	9	n	n	nonsevere	mild	79	0	average	-1.91301	-1.52647	0.248	0.473558	-1.58397	-1.56871	0.756037	-0.873297	-1.96779	-1.72866	-1.83192	0.00481408	-2.28348	-1.61683	0.400768	-2.4076	-0.902584	1.19165	0.444056	0.925226
p190	patient	m	30	15	n	n	nonsevere	mild	107	0	average	0.836066	-1.88214	-0.988662	0.578672	-0.89495	0.924502	0.588189	-0.100736	1.55681	0.696847	-1.56854	-0.971957	-0.1967	-2.41068	-3.11397	-2.23632	2.80966	-1.89308	-0.491193	-0.914606
p191	patient	f	43	12	n	y	nonsevere	mild	77	0	average	-2.98922	-3.69928	-5.00726	-1.8605	-0.614214	-0.388319	0.836475	1.07839	-1.25656	0.746875	-0.680769	1.12731	0.214202	-0.0368113	0.360862	0.221449	-1.63448	-1.07305	0.781528	0.548424
p192	patient	f	48	12	n	n	nonsevere	mild	101	1	below average	-1.26317	-1.87032	-0.304762	0.66941	-0.0910975	-1.05258	0.836475	1.65094	-0.11572	0.0877765	-0.680769	-0.67192	-0.935652	-2.07145	0.360862	-2.34123	0.90739	-1.07305	-0.435686	-0.291097
p193	patient	m	56	8	y	n	nonsevere	moderate	78	0	above average	1.81188	-2.11024	-2.30113	0.067332	-0.0589238	0.902993	-0.973934	-0.873297	-0.339234	-0.497299	-3.253	1.23145	1.78264	1.43467	0.400768	1.66363	-0.0738162	-0.329641	-0.311544	0.0417324
p194	patient	f	64	12	n	n	nonsevere	mild	77	1	average	2.73041	1.01153	0.798683	0.632467	-1.7	-0.422006	0.933234	1.18099	-1.8818	-1.2914	0.805552	1.5163	0.796971	1.70716	0.552105	1.78681	-0.702527	0.86662	-0.723336	-0.688835
p195	patient	m	35	16	n	n	nonsevere	moderate	113	0	average	-1.67359	-0.49335	0.974273	0.578672	-1.44419	-1.35304	0.588189	-1.39333	0.246246	-0.926102	0.380943	0.867393	0.758206	0.404364	0.0129222	-0.0637195	1.23137	0.314522	2.30123	1.11322
p196	patient	f	59	9	n	n	severe	critical	83	1	average	-2.19413	-0.358922	0.913894	0.473558	-0.0589238	0.902993	0.756037	1.16857	-0.339234	0.734062	0.861423	0.00481408	-1.16819	-0.950218	0.400768	-0.852252	0.392616	1.19165	0.504746	2.69221
p197	patient	m	62	12	n	n	nonsevere	mild	83	0	average	0.574329	-0.179337	-0.797958	0.632467	-1.12978	-2.87976	-0.923712	-2.31113	-0.69084	-1.2914	-0.704314	-1.35528	0.796971	-0.964324	0.552105	-0.499886	-1.09893	-1.95001	-1.50532	-0.982662
p198	patient	m	48	10	n	n	nonsevere	moderate	91	0	average	-1.32955	1.9479	-0.819109	0.665838	-0.0910975	0.940206	0.836475	-1.78433	-1.82697	-1.23042	-0.435386	1.12731	-0.683597	0.14046	0.360862	-0.231069	0.25603	-1.07305	1.33966	1.1081
p199	patient	f	42	9	n	n	nonsevere	moderate	95	0	poor	-2.98922	-2.29669	-8.91379	0.664052	-1.66045	-1.05258	0.836475	-1.78433	1.59553	-3.86681	0.856495	-2.07238	0.592284	-1.80554	0.360862	-0.88444	0.0985857	-1.47718	-0.554454	-0.570937
p200	patient	f	58	12	n	n	nonsevere	moderate	95	0	average	-2.19413	-2.11024	0.570557	-4.48193	-0.0589238	0.0790934	-2.70391	-0.192676	-1.96779	0.734062	0.861423	-0.382944	-0.419611	-1.21158	0.400768	-1.01198	-0.237727			-0.620888
p201	patient	f	50	9	n	n	nonsevere	mild	72	0	below average	-0.718234	-0.942695	0.913894	0.473558	-0.0589238	0.902993	0.756037	-0.873297	1.28932	-1.72866	0.861423	1.23145	-0.0528927	0.383003	0.400768	1.09193	-0.235811	-1.31367	-0.700253	0.483479
p202	patient	m	54	11	y	n	nonsevere	moderate	33	0	average	-2.05357	-0.942695	0.685003	-2.40778	-1.58397	0.902993	-0.973934	-0.873297	-0.339234	-0.497299	0.861423	1.23145	1.78264	-1.12446	0.400768	0.726225		-0.65956	-1.07434	0.483479
p203	patient	f	62	12	n	n	nonsevere	moderate	104	0	average	-1.23399	-0.774773	0.798683	0.632467	0.0106401	-1.24126	-0.923712	-0.565067	-0.0953613	-1.2914	0.805552	0.0937109	-0.238919	-1.63729	0.552105	-0.826557	-0.427189	0.474181	0.171749	2.24944
p204	patient	f	56	12	n	n	nonsevere	moderate	90	0	average	-0.226268	-2.11024	1.20993	-4.48193	-1.07562	-1.56871	-0.397277	-0.873297	-1.42494	1.34974	-0.652486	-0.382944	-0.419611	-2.5448	0.400768	-2.17849				-0.400014
p205	patient	f	56	8	n	n	severe	severe	96	0	average	-0.577672	-3.27779	1.02834	0.471807	-1.58397	-1.56871	-0.973934	-2.91516	-0.339234	0.118382	-0.169176	0.134067	-1.04595	0.470123	0.400768	0.108277	0.509925	0.516553	-0.324153	0.483479
p206	patient	f	53	12	n	n	nonsevere	moderate	42	0	below average	-1.49132	-0.942695	1.20993	0.478811	-1.58397	0.902993	0.756037	-0.873297	-0.339234	-0.497299	0.861423	-0.382944	0.695682	-0.544965	0.400768	0.154534	-0.606225	0.516553	-1.0417	0.0417324
p207	patient	f	56	13	n	n	severe	severe	77	0	average	-1.84273	-0.358922	1.12201	0.479217	-0.0589238	0.902993	0.756037	-0.873297	1.28932	-1.72866	-0.773314	1.13215	-0.54185	0.0345256	0.339891	-0.0283202	0.729593	-0.751142	-0.0420791	-0.179141
p208	patient	m	42	16	n	y	nonsevere	mild	126	0	average	1.45868	0.755307	-0.059817	0.669824	-1.66045	0.940206	0.305069	1.65094	-0.11572	-0.571322	0.394165	0.58449	-0.289907	0.286859	-0.0125441	0.272259	1.65038	-3.71887	-1.50869	-0.570937
p209	patient	f	59	12	n	n	severe	severe	70	1	poor	-1.77245	-0.942695	-0.0953374	0.478811	-1.58397	0.902993	0.756037	1.16857	-0.339234	-1.11298	-2.1944	-2.0273	0.695682	-1.21158	0.400768	-1.40081	0.511261	-0.957126	0.143537	2.69221
p210	patient	f	60	12	n	n	severe	severe	90	0	average	-1.3731	0.416098	1.18194	0.632467	0.580852	1.2165	-1.54269	-0.565067	0.500117	-0.718752	0.805552	-1.35528	-0.238919	-1.63729	0.552105	-1.15323	-0.73683	1.47723	-0.221085	2.54327
p211	patient	m	43	12	y	n	nonsevere	moderate	100	0	average	-1.52871	0.675158	0.478988	0.256857	0.432019	0.275943	0.836475	0.505848	-0.11572	0.0877765	0.856495	1.12731	-0.935652	-0.715025	0.360862	-0.205664	1.75332	-0.548978	-0.0237488	-0.291097
p212	patient	m	27	16	n	n	nonsevere	moderate	100	0	above average	-1.04618	-1.18774	0.280198	0.578672	-1.99343	-0.593859	-0.168395	-0.747035	-0.409038	-0.385119	0.380943	0.867393	0.758206	-1.77823	0.0129222	-0.456613	-0.032315	-0.533358	-0.905253	0.437279
p213	patient	m	38	15	y	y	nonsevere	mild	82	0	average	0.557215	-3.18347	0.399487	0.282918	-0.345708	-2.11222	-0.924978	-1.39333	-1.06432	-0.926102	-3.68378	1.02431	-1.26915	-0.955619	0.095529	-1.45053	-0.953883	0.606244	0.196579	1.11322
p214	patient	m	58	16	n	y	nonsevere	mild	91	0	below average	-2.54554	0.298376	0.778669	-1.99455		0.902993	0.756037	0.487946	-1.96779	-1.11298	0.406117	0.744396	0.206725	0.439778	0.102161	0.589628	0.615562	1.19165	0.424262	-0.841761
p215	patient	f	48	12	n	n	severe	severe	105	1	average	-0.00182224	-1.23395	-1.87226	-4.39041	-0.0910975	-0.388319	0.305069	-1.78433	-1.82697	-0.571322	-0.680769	1.12731	0.214202	-0.0368113	0.360862	-0.205664	-1.73989	0.0657559	-0.673061	-0.570937
p216	patient	m	66	15	n	n	severe	severe	123	1	above average	0.157024	-0.774773	0.592875	0.63275	0.0106401	0.397245	-0.30473	-0.565067	0.500117	0.426538	0.471967	-1.38167	1.49225	1.46369	0.436287	0.999278	-0.783564	1.47723	-0.40504	1.66179
p217	patient	m	57	15	n	y	nonsevere	moderate	79	0	average	1.46047	1.46592	0.22722	0.479217	-0.0589238	-0.744806	0.756037	-1.55392	-0.339234	-1.72866	0.526945	0.873649	1.44426	0.526897	0.181404	1.16132	0.564575	-0.247254	-0.774767	-0.620888
p218	patient	f	59	15	n	n	nonsevere	moderate	122	0	good	-0.929076	-0.358922	0.22722	-1.99631	-1.58397	0.0790934	0.17938	-0.873297	-0.339234	-1.11298	-1.01497	-0.770702	-1.90162	-0.806324	0.181404	-1.56054	-0.703987	1.19165	0.516941	0.0417324
p219	patient	f	50	16	n	n	severe	severe	79	0	below average	-0.226268	-0.942695	-7.87796	-6.95529	-0.567273	-0.744806	-0.397277	-1.55392	-0.339234	0.118382	0.406117	0.744396	-2.02386	0.439778	0.102161	-0.188046	1.03954	0.516553	-0.218606	0.483479
p220	patient	f	56	12	n	n	nonsevere	mild	108	1	good	0.898225	-2.11024	-0.0953374	-4.48193	-1.58397	-1.56871	-0.973934	-0.873297	-1.96779	-1.11298	-2.1944	1.23145	1.78264	0.788255	0.400768	0.932208	-0.3079	-0.957126	-0.578556	-0.841761
p221	patient	f	57	12	n	n	nonsevere	moderate	81	0	below average	-2.33469		0.570557								0.861423	-2.0273	-0.419611	-0.544965	0.400768	-1.01198				0.704353
p222	patient	f	50	4	n	n	nonsevere	moderate	96	0	average	-0.366829	-2.69402	-1.17746	-4.49594	-1.58397	0.902993	-0.397277	-0.873297	0.203618	-0.497299	-1.22778	0.651078	-0.556989	-1.18123	-2.02574	-1.49333	0.495666	-0.247254	0.887833	-0.400014
p223	patient	f	31	15	n	n	nonsevere	mild	106	0	good	0.69664	-1.18774	1.09356	0.578672	-0.345708	0.165321	0.588189	-0.100736	0.90153	0.155864	0.546698	-0.971957	-1.26915	0.499445	0.095529	-0.271851	1.89779	1.06393	0.260118	0.211965
p224	patient	f	60	12	n	n	severe	severe	83	2	above average	1.06119	1.01153	1.18194	-1.09719	1.72128	1.2165	0.933234	1.18099	-1.28632	0.426538	0.805552	-1.35528	-0.238919	0.381609	0.552105	-0.173215				2.8371
p225	patient	f	39	12	n	y	nonsevere	mild	97	0	poor	-0.697615	-0.405894	1.42378	-1.25729	-0.345708	0.924502	0.588189	1.19186	-0.409038	-0.926102	1.00554	-0.501214	0.155931	-0.670375	0.324204	-0.110459	-0.131932	0.314522	0.523429	0.211965
p226	patient	m	33	15	n	n	nonsevere	moderate	59	0	below average	-0.767328	-0.49335	1.09356	0.578672	0.752776	0.924502	0.588189	-0.747035	-1.06432	-0.385119	0.546698	1.02431	-1.26915	-0.228087	0.095529	-0.271851	-0.0501439	-0.834244	-1.0508	0.211965
p227	patient	m	40	19	y	n	nonsevere	moderate	71	0	average	0.197338	-0.59758	-1.24767	0.269359	-1.66045	-1.05258	0.836475	-0.0666977	1.59553	0.746875	0.0260902	0.152337	-0.667989	0.699165	-0.309824	0.096811	-0.412985	0.457575	0.207065	-0.291097
p228	patient	f	57	15	n	n	nonsevere	moderate	87	0	average	-0.43711	-3.27779	0.22722	-1.99631	-0.0589238	0.902993	-1.55059	-0.192676	0.203618	-1.11298	-1.01497	-2.05725	-1.90162	-0.806324	0.181404	-2.33821	0.492667	-0.247254	-1.07518	-0.400014
p229	patient	m	32	15	n	n	nonsevere	moderate	104	0	average	-0.0701999	-0.49335	-0.294587	-3.08906	0.203534	0.165321	-1.68156	-0.100736	0.90153	0.696847	0.546698	-0.971957	-1.26915	1.22698	0.095529	0.121043	0.135072	-0.167124	-0.450793	-0.689292
p230	patient	m	68	16	n	n	nonsevere	moderate	84	0	average	2.73041	-2.56108	0.125112	-1.0923	-1.7	0.397245	0.933234	1.18099	-1.8818		0.351462	1.08711	0.342825	-1.98909	0.394449	-0.461024		0.175778	0.174146	0.780304
p231	patient	f	38	12	n	n	nonsevere	mild	87	0	good	-0.0701999	-1.18774	0.757354	0.578371	1.30202	-1.35304	-1.68156	-2.68593	1.55681	0.155864	1.00554	1.45868	1.20114	0.784689	0.324204	1.46112	-0.621369	-0.167124	-0.437391	-0.914606
p232	patient	f	38	12	n	n	severe	severe	82	0	average	-0.976466	0.895438	1.42378	-1.25729	-0.345708	-1.35304	0.588189	1.19186	-0.409038	-2.54905	1.00554	1.45868	0.155931	0.0571569	0.324204	0.675329	0.934652	0.314522	-0.176896	1.11322
p233	patient	f	34	12	n	n	nonsevere	moderate	89	0	average	-1.53417	-1.88214	0.757354	0.578371	1.30202	0.924502	0.588189	-0.747035	1.55681	-0.385119	1.00554	-0.501214	-0.916518	-2.85297	0.324204	-1.68204	-1.1188	-0.167124	-0.481581	-0.689292
p234	patient	f	58	12	n	n	nonsevere	mild	93	1	above average	-0.577672	1.3924	1.20993	-2.00156	-1.07562	-1.56871	-0.973934	-0.873297	-1.96779	0.734062	-0.652486	1.23145	0.695682	0.121645	0.400768	0.154534	-0.59968	-0.518305	-0.261084	-0.620888
p235	patient	f	52	11	n	n	nonsevere	moderate	83	0	poor	-2.40497	-0.942695	1.20993	0.47706	-0.0589238	0.0790934	-1.55059	-0.873297	-0.339234	0.118382	0.861423	-1.89804	0.817921	-0.457846	0.400768	-0.0514488	-0.53938	0.516553	0.745012	-0.400014
p236	patient	f	64	9	n	n	nonsevere	moderate	88	2	average	-1.85995	-0.179337	0.605331	0.628804	0.0106401	1.2165	0.933234	-0.565067	-0.0953613	-0.146107	-1.8806	0.4354	-1.97009	0.645459	0.552105	-0.692368	-0.620245	0.474181	-0.0231013	-0.688835
p237	patient	f	41	16	n	n	nonsevere	mild	100	0	good	-1.13039	0.0387889	-0.059817	0.669824	-0.0910975	0.275943	0.305069	-0.0666977	-0.11572	0.746875	0.394165	0.58449	0.859946	-0.391355	-0.0125441	0.272259	-1.20945	0.0657559	-1.7498	-0.570937
p238	patient	f	70	15	n	n	nonsevere	moderate	88	0	average	-0.0264522	-1.54293	-2.51319	-2.41317	-0.0101257	-1.41431	-0.589324	-0.214526	-0.136146	-0.483973	-1.44385	-0.734973	-0.949686	-3.02523	0.434351	-2.67409	4.48063	0.748286	-0.378389	3.53396
p239	patient	m	71	11	n	y	nonsevere	mild	133	1	above average	0.498003	-1.9574	1.39061	-2.42153	-0.0101257	-0.550578	0.569337	-1.9671	0.895998	1.30342	0.698141	-0.204483	-0.395402	1.10175	0.565473	0.89109	1.25668	-0.139871	-1.43598	1.57221
p240	patient	f	55	9	n	n	nonsevere	mild	74	0	good	0.546821	0.224852	0.248	0.473558	0.449426	0.902993	-0.973934	-0.192676	1.28932	-0.497299	0.861423	0.00481408	-1.16819	-0.283607	0.400768	-0.0745774	-0.877556	1.19165	-0.646429	2.47134
p241	patient	m	54	9	n	y	severe	severe	74	0	average	-1.35076	-0.869171	0.248	-2.00681	-0.0589238	0.902993	0.756037	-2.91516	-1.96779	-2.34434	-0.290003	0.00481408	-0.0528927	0.383003	0.400768	-0.463414	0.692433	-1.62052	0.893615	1.80872
p242	patient	m	35	16	n	n	nonsevere	mild	99	0	below average	1.60291	1.58983	0.280198	0.578672	-1.44419	-0.593859	-1.68156	-0.747035	0.246246	1.77881	0.380943	0.867393	-1.38669	1.1319	0.0129222	0.329175	-0.378227	1.06393	-1.22242	-0.914606
p243	patient	f	55	9	n	n	severe	severe	88	0	poor	-2.47525	-0.358922	0.913894	0.473558	1.46613	0.902993	0.756037	1.16857	1.28932	-0.497299	0.861423	0.00481408	-1.16819	-0.283607	0.400768	-0.852252	0.821346	-0.518305	-0.906805	-0.620888
p244	patient	f	60	12	n	n	severe	critical	75	0	below average	-0.886239	-1.37021	-1.19712	-2.82684	0.0106401	1.2165	-0.923712	1.18099	1.69107	-0.718752	-0.704314	1.5163	-1.27481	0.381609	0.552105	-0.173215	0.301594	-0.634528	-0.985357	5.48155
p245	patient	f	26	16	n	n	nonsevere	mild	99	0	average	-1.1856	-1.18774	0.280198	-1.2521	1.30202	0.924502	0.588189	1.19186	1.55681	1.23783	0.380943	0.867393	0.758206	0.404364	0.0129222	0.722069	1.93093	-0.533358	-0.524549	-0.238663
p246	patient	m	27	15	n	y	nonsevere	mild	83	0	average	-0.209625	0.982895	-0.988662	-1.2534	-0.345708	0.165321	-0.924978	-1.39333	-1.06432	-0.385119	0.546698	1.02431	0.87575	-0.955619	0.095529	0.121043	-0.625296	0.314522	-1.25278	-0.914606
p247	patient	f	57	15	n	n	severe	severe	110	0	above average	-1.06964	-1.52647	0.22722	0.479217	-0.0589238	0.902993	0.756037	-0.873297	-0.339234	0.118382	0.526945	-0.770702	-0.786329	-2.13954	0.181404	-1.94938	2.54656	0.0826653	0.0353206	-0.400014
p248	patient	f	63	16	n	n	severe	severe	123	2	average	-1.6513	-0.774773	-0.274049	-1.0923	0.580852	1.2165	0.933234	-0.565067	-1.8818	-2.43669	0.351462	1.08711	0.342825	0.702775	0.394449	0.845658	0.612997	-0.788763	-0.433335	0.486476
p249	patient	f	39	6	n	n	nonsevere	moderate	77	0	above average	-0.209625	-0.49335	-3.38543	0.570596	1.30202	0.924502	0.588189	-0.747035	1.55681	-0.385119	-2.19199	-1.55599	-4.50105	-0.0998874	0.324204	-2.93083	3.04834	-0.834244	2.49889	2.01448
p250	patient	f	42	15	n	n	nonsevere	moderate	92	0	average	-1.13039	1.31153	-0.708866	0.669824	-0.0910975	-1.05258	0.836475	0.505848	-1.82697	0.746875	0.516857	0.728541	-0.16388	-1.65915	0.0865492	-0.808224	-0.300357	1.07231	-0.677493	1.1081
p251	patient	f	39	12	n	n	nonsevere	moderate	86	0	average	-0.976466	-2.57653	0.757354	0.578371	0.752776	0.165321	-0.168395	-2.68593	0.90153	-0.926102	1.00554	1.45868	1.20114	0.784689	0.324204	1.46112	-1.43054	1.06393	0.084334	-0.238663
p252	patient	m	52	12	n	n	severe	severe	124	0	above average	0.546821	-0.942695	-0.0953374	0.478811	-0.0589238	-0.744806	-0.397277	-1.55392	-0.339234	-1.11298	-2.1944	-0.382944	1.78264	-0.544965	0.400768	-0.62314	-0.774776	-0.957126	-0.865849	-0.841761
p253	patient	f	65	12	n	n	severe	severe	98	2	average	1.8958	1.01153	0.798683	-1.09719	-1.7	1.2165	-0.923712	-0.565067	-1.8818	-0.718752	0.805552	0.0937109	0.796971	-2.31026	0.552105	-0.499886	0.639624	0.86662	-0.367553	1.07413
p254	patient	f	55	15	n	n	severe	severe	66	0	average	-0.999357	-2.11024	-2.43636	0.479217	0.957776	0.0790934	-0.973934	1.16857	1.28932	-1.11298	0.526945	0.873649	0.328964	-2.13954	0.181404	-0.782866	0.177962	0.0826653	-0.684947	1.36697
p255	patient	f	60	12	n	n	nonsevere	moderate	97	0	poor	1.40894	0.416098	-0.398798	-1.09719		1.2165	0.933234	-2.31113	1.69107	-0.718752	0.805552	1.5163	1.80655	0.381609	0.552105	1.46014	-1.14613	-0.279974	-1.35977	2.54327
p256	patient	f	48	9	n	n	nonsevere	mild	87	0	below average	-1.99342	-0.59758	-0.684408	-1.86586	-0.0910975	-1.05258	0.836475	-1.78433	-0.11572	-0.571322	0.856495	1.12731	-1.70742	0.90731	0.360862	0.824009	-0.577066	-1.07305	0.822144	-0.291097
p257	patient	m	48	9	n	n	nonsevere	moderate	96	0	below average	-1.06401	-1.23395	-1.46816	-1.86586	-0.0910975	0.940206	0.305069	-0.639243	0.454698		0.856495	1.12731	-1.70742	-0.449117	-3.16893	-0.457328	-1.23361	1.07231	-0.980394	1.94762
p258	patient	m	37	17	n	y	nonsevere	moderate	99	0	average	0.766353	1.58983	-0.533165	-1.25081	-1.99343	0.165321	-0.924978	-0.747035	-2.37489	-0.385119	0.215188	0.710478	-1.50424	-0.41825	-0.0696847	-0.641376	-0.682172	1.06393	-0.349743	0.211965
p259	patient	m	63	7	n	y	nonsevere	mild	100	1	good	1.47849	-0.69978	0.742536	0.626362	1.15106	1.2165	0.933234	1.18099	-0.69084	-0.146107	-0.10179	-0.785795	-0.707126	0.821359	-0.854529	-0.0584573	-0.753975	1.47723	-0.00193871	-0.101179
p260	patient	f	60	6	n	n	nonsevere	mild	86	0	poor	-2.83366	-1.76915	-3.7792	0.625141	1.72128	1.2165	0.933234	0.0169529	1.69107	-3.58198	0.0187154	-0.671898	-0.593589	0.236343	-0.812691	-0.558179	-0.589612	-0.279974	-0.538566	1.36796
p261	patient	f	55	12	n	n	nonsevere	moderate	69	0	below average	-1.06964	0.808626	-6.75428	0.478811						-2.34434	0.861423	-2.0273	0.695682	0.121645	0.400768	0.154534	-0.909681	-0.247254	0.493308	0.0417324
p262	patient	f	64	10	n	n	severe	severe	98	0	average	-1.85995	-2.56108	-0.261592	-1.09963	0.0106401	-0.422006	-0.923712	0.0169529	-0.0953613	-3.58198	-0.463305	0.321503	-2.08362	-2.13436	-0.980043	-2.15267		-2.76663	-0.691234	1.36796
p263	patient	f	48	12	n	n	nonsevere	mild	109	0	below average	-1.32955	-0.59758	-2.65601	0.66941	-0.614214	0.275943	0.836475	1.07839	1.59553	0.746875	0.856495	1.12731	1.33485	0.641402	0.360862	1.50279	0.882657	-1.07305	0.123467	2.50731
p264	patient	f	48	12	n	n	nonsevere	moderate	106	0	above average	0.993977	0.0387889	0.478988	0.66941	1.47825	0.940206	-0.757742	-0.0666977	1.59553	-0.571322	0.856495	1.12731	-0.935652	0.641402	0.360862	0.648561	-0.919457	1.07231	0.0722998	-0.291097
p265	patient	f	39	15	n	n	nonsevere	mild	95	0	below average	-0.83704	-1.88214	-0.988662	0.578672	0.203534	0.924502	0.588189	1.19186	1.55681	0.155864	0.546698	-2.53385	-0.1967	-0.228087	0.095529	-0.664745	-0.0563055	1.06393	0.230617	-0.463977
p266	patient	f	42	8	n	n	nonsevere	mild	119	1	average	-0.267369	0.0387889	0.234044	0.662266	-0.0910975	-1.05258	-0.757742	-0.0666977	-0.11572	0.746875	0.856495	-0.0957166	-2.73125	-2.39512	0.360862	-2.39204	-1.11069	1.07231	1.99437	1.66778
p267	patient	f	48	15	n	n	nonsevere	moderate	117	0	average	0.72843	0.0387889	0.0748843								-1.04884	0.728541	-0.16388	1.05371	0.0865492	0.473113	-1.4533	-1.07305	0.547182	-0.570937
p268	patient	m	53	9	n	y	severe	severe	154	1	above average	-1.5616	0.298376	-3.08147	0.473558	-0.0589238	0.902993	-0.973934	-0.192676	0.74647		-3.37383	-1.63954	-1.16819	-2.28344	0.400768	-3.18527	0.213332	-0.247254	0.678835	-0.620888
p269	patient	m	66	6	n	y	severe	severe	156	3	average	-1.5122	-0.69978	0.811139																	-0.395007
p270	patient	f	50	15	n	n	nonsevere	moderate	107	0	average	-0.507391	-0.942695	0.893114	0.479217	1.46613	0.902993	0.756037	1.16857	0.203618	1.34974	-1.01497	0.873649	0.328964	0.526897	0.181404	0.383646	1.28614	-0.751142	-1.07358	-0.400014
p271	patient	m	29	12	n	n	nonsevere	mild	156	0	good	-0.976466	-0.49335	0.757354	-1.25729	-0.345708	0.924502	0.588189	-0.747035		-0.385119	1.00554	-2.49748	0.155931	1.49018	-2.86615	0.282435	-0.106593	-0.167124	0.139701	-0.689292
p272	patient	f	37	9	n	n	severe	severe	155	0	good	-1.67359	-1.88214	1.42378	-3.09683	-0.345708	-1.35304	0.588189	-0.747035	-0.409038	0.696847	1.00554	1.45868	1.20114	0.342401	0.324204	1.62251	1.04313	1.06393	1.11689	-0.463977
p273	patient	f	52	9	n	n	nonsevere	moderate	154	0	good	0.265698	0.224852	1.20993	0.473558	-0.0589238	0.0790934	0.756037	-0.192676	-0.339234	0.734062	-1.83192	-1.63954	-0.0528927	1.04961	-2.42195	-0.463414	-0.124375	-1.89421	-1.34077	-0.400014
p274	patient	f	49	6	n	n	nonsevere	moderate	155	0	good	1.59146	-0.59758	-2.63155	0.658694	-0.0910975	-1.05258	0.836475	-0.0666977	-0.686138	0.0877765	-1.51032	-1.64023	-1.32934	-0.861423	0.360862	-1.99033	-4.38372	-1.47718	1.49524	-0.291097
p275	patient	f	57	12	n	n	severe	severe	155	0	average	-2.05357	-0.358922	0.570557	-2.00156	-0.0589238	-1.56871	0.17938	-2.23454	-1.42494	-0.497299	-2.1944	-2.0273	-1.5349	-0.544965	0.400768	-1.78965	0.608878	-0.247254	-0.279496	0.704353
p276	patient	f	58	10	n	n	nonsevere	mild	105	1	average	-0.999357	-1.52647	1.20993	-2.00506	0.957776	0.0790934	0.756037	-2.23454	-1.96779	0.734062	-0.410831	1.23145	0.940161	0.962494	0.400768	1.29792	0.89293	1.19165	0.250256	2.47134
p277	patient	f	58	10	n	n	nonsevere	moderate	91	0	poor	-3.10778	-2.69402	-4.52771	0.475309	0.957776	-1.56871	0.17938	-2.23454	-1.96779	-0.497299	0.861423	-0.124439	-2.40572	0.295884	-2.5012	-0.646269	-0.359182	-0.957126	0.556921	3.13396
p278	patient	m	56	12	n	n	nonsevere	moderate	105	0	below average	0.265698	0.808626	-0.761232	0.478811	-0.0589238	-1.56871	0.756037	1.16857	-0.339234	1.34974	-0.652486	-0.382944	0.695682	0.788255	0.400768	0.154534	-1.34126	-0.751142	-1.10091	0.262606
p279	patient	f	33	15	n	n	nonsevere	mild	77	0	average	0.626928	-1.18774	-0.988662	0.578672	1.30202	0.924502	0.588189	1.19186	-0.409038		-1.56854	-0.971957	-0.1967	0.499445	0.095529	-0.664745	-1.69369	1.06393	0.745609	-0.914606
p280	patient	f	34	15	n	n	nonsevere	moderate	132	0	above average			0.399487								0.546698	1.02431	0.87575	-0.228087	0.095529	0.513937				6.97139
p281	patient	m	32	27	n	n	nonsevere	mild	119	0	average	-1.32503	0.201044	-1.72605	0.578672	-1.99343	0.924502	-1.68156	-0.747035	-0.409038	-0.385119	-1.44236	-0.858667	-1.60722	-1.36906	-0.895753	-2.0961	-2.27616	-1.09271	0.852922	1.78916
p282	patient	m	56	15	n	y	nonsevere	mild	126	1	average	-0.226268	-0.869171	-2.43636	-4.47668	-0.567273	-1.56871	0.17938	-2.23454	-0.339234	0.118382	0.526945	-0.770702	0.328964	-0.139713	0.181404	-0.00519156	-0.0705809	0.516553	0.745228	1.1461
p283	patient	m	37	12	n	n	nonsevere	moderate	109	0	average	-0.558189	0.895438	0.0632797	0.578371	-1.44419	0.165321	-0.924978	-0.747035	-1.06432	-0.926102	1.00554	-0.501214	1.20114	0.784689	0.324204	1.06822	0.0418475	1.06393	-0.778065	-0.463977
p284	patient	f	42	12	n	n	nonsevere	moderate	129	0	below average	-0.532915	0.0387889	-1.08851	-4.39041	-0.0910975	-1.05258	0.836475		-0.11572	-1.88952	-0.680769	-0.67192	0.214202	-0.715025	-3.46621	-1.487	0.124377	0.0657559	-0.291985	2.22747
p285	patient	m	66	2	n	n	nonsevere	mild	154	0	average	-1.9295	-0.774773	0.28723	0.620256	1.15106	1.2165	0.933234	1.18099	0.500117		-1.03706	-0.216313	0.896446	-1.43076	-0.645339	-1.25038		-0.634528	0.532604	0.780304
p286	patient	f	58	12	n	n	severe	severe	156	1	average	-0.226268	-2.11024	-0.0953374	0.478811	1.46613	0.902993	0.756037	-2.91516	-1.42494	0.734062	-0.652486	-0.382944	-1.5349	-1.87819	0.400768	-1.78965	-0.904086	0.516553	0.555459	0.483479
p287	patient	m	42	9	n	n	nonsevere	moderate	154	0	poor	0.72843	-1.23395	0.0993422	0.664052	-1.13733	0.275943	0.836475	1.07839	0.454698	-1.23042	-1.87839	-0.239767	1.33485	0.229096	-3.16893	-0.457328	-0.579335	-2.13145	-0.590318	0.548424
p288	patient	m	32	19	n	y	severe	severe	156	0	above average	0.0692256	-0.405894	-0.771743	0.578672	-0.345708	0.165321	0.588189	-0.100736	1.55681	0.155864	-0.116322	0.396649	-1.73932	-0.608412	-0.234898	-1.0109	-0.491631	1.06393	0.465772	1.33854
p289	patient	f	74	12	n	y	nonsevere	mild	122	0	above average	-0.28868	0.887758	0.583062	0.542499	-0.0101257	-0.550578	-0.589324	-0.214526	-0.136146	0.111823	0.698141	1.31938	-0.533973	1.6326	0.565473	1.44304	-0.96336	-0.139871	-1.33367	0.264367
p290	patient	m	57	16	n	y	nonsevere	moderate	106	1	good	-1.2102	-1.45294	0.112774	0.479217	-1.07562	0.0790934	-0.397277	-0.192676	-0.882086	-1.72866	0.406117	0.744396	1.32202	0.439778	0.102161	0.978465	-0.0284685	-0.247254	-0.72868	-0.620888
p291	patient	m	60	9	y	y	nonsevere	mild	149	1	good	-1.3731	-1.89065	0.605331	0.346748	0.0106401	0.397245	-0.30473	-0.565067	-0.0953613	0.426538	0.805552	1.5163	1.13758	0.645459	0.552105	1.59433	-0.523609	1.10431	-0.27423	-0.688835
p292	patient	m	57	13	n	n	nonsevere	moderate	153	1	average	-0.43711	-0.358922	-0.209783	-4.48018	-1.58397	-0.744806	-1.55059	-0.873297	-0.882086	-1.72866	-2.31523	-0.512197	-1.65714	-1.2987	0.339891	-2.36134	2.01517	-2.48887	-0.580604	0.0417324
p293	patient	f	63	6	y	n	nonsevere	mild	150	0	average	-0.329832		-0.785502								-1.51908	0.777088	-0.593589	-2.45552	-0.812691	-1.86486				-0.688835
p294	patient	m	55	12	y	y	nonsevere	mild	161	0	average	0.968506	-0.869171	-1.42713	0.0743362	-0.0589238	-1.56871	0.756037	1.16857	-0.339234	-1.11298	-0.652486	-0.382944	-0.419611	-1.87819	0.400768	-1.78965	1.64859	-0.930611	-0.74727	3.57571
p295	patient	m	35	16	n	n	severe	severe	149	0	above average	-0.279338	0.895438	-1.10795	0.578672	-1.99343	-0.593859	-0.168395	-0.100736	-0.409038	0.696847	0.380943	0.867393	-1.38669	1.1319	0.0129222	0.329175	-0.605751	-0.533358	-0.409602	-0.463977
p296	patient	f	65	15	n	n	nonsevere	moderate	152	0	average	-0.12118	0.416098	0.992035	0.63275	1.72128	0.397245	0.933234	0.0169529	1.0956	-1.2914	0.471967	-0.247978	-0.579528	-0.555208	0.436287	-0.307404	0.744518	-1.64713	-1.206	0.192648
p297	patient	f	57	7	n	n	nonsevere	mild	173	0	average	-1.77245	-1.52647	-0.854898	0.470056	-0.0589238	0.0790934	0.756037	-2.23454	-0.339234	-2.34434	-1.59026	-1.38103	-3.15429	-2.1092	0.400768	-3.2084	-0.717384	-1.14314	-0.12892	0.262606
p298	patient	m	60	16	n	y	nonsevere	moderate	148	1	good	1.33939	-1.89065	0.125112	0.63275	-1.7	0.397245	-0.923712	-1.14709	-0.69084	-0.146107	-1.18633	1.08711	0.342825	0.702775	0.394449	0.518988	-1.02087	1.47723	0.103324	-0.982662
p299	patient	m	68	7	n	n	nonsevere	moderate	94	0	average	-1.30354	0.416098	-0.454944	0.626362	0.580852	0.397245	0.314252	0.598973	1.0956	-1.2914	-0.10179	-0.785795	1.36465	-0.524574	0.552105	-0.0584573		-0.466281	-0.507914	0.192648
p300	patient	m	52	12	n	n	severe	severe	121	0	above average	-0.43711	0.224852	-0.761232	-2.00156	-1.07562	-1.56871	-2.12725	-2.23454	-0.882086	1.96542	0.861423	1.23145	0.695682	0.788255	0.400768	1.32105	-0.293871	1.19165	0.145887	0.0417324
p301	patient	f	35	15	n	n	nonsevere	moderate	149	0	poor	-2.71928	-3.27093	0.399487	-3.08906	-0.89495	0.165321	-1.68156	-0.747035	-2.37489	0.155864	0.546698	1.02431	-1.26915	-0.955619	0.095529	-1.05764	7.73681	0.314522	-0.32783	-0.689292
p302	patient	m	57	16	n	n	nonsevere	moderate	156	0	average	-0.999357	0.224852	-1.21902	-1.99455	-0.0589238	0.902993	-0.397277	1.16857	-0.339234	0.734062	-1.1358	-0.899955	-0.908568	-0.893443	-2.97666	-2.13223	0.856359	-0.751142	0.315599	-0.841761
p303	patient	f	46	9	n	n	nonsevere	moderate	123	0	below average	-0.798461	-3.14306	-3.81941	-1.86586	-0.0910975	0.940206	0.836475	-0.0666977	-0.11572	0.746875	-1.87839	-0.239767	-2.85728	0.90731	0.360862	-1.31155	-0.569886	1.07231	0.869319	3.62667
p304	patient	f	65	12	n	n	nonsevere	mild	144	0	good	0.365676	1.60697	0.798683	-2.82684	1.72128	1.2165	0.933234	-0.565067	1.69107	-0.146107	0.805552	0.0937109	-0.238919	1.05457	-1.06372	0.153455	0.572933	-1.19324	-1.13263	-0.982662
p305	patient	f	56	14	n	n	nonsevere	moderate	150	0	good	-0.718234	0.224852	0.341666	0.479217	-0.0589238	0.902993	-1.55059	-0.873297	0.203618	-0.497299	0.647772	-0.641449	-0.664089	1.28063	0.260647	0.5665	-0.617932	0.516553	0.696917	-0.400014
p306	patient	f	66	9	n	n	nonsevere	mild	150	1	average	-1.02534	-0.179337	1.00449	0.628804	-0.559572	0.397245	0.314252	-0.565067	1.0956	-1.2914	-0.3428	0.4354	1.13758	0.645459	0.552105	0.614315	0.300828	0.474181	0.799715	-0.982662
p307	patient	m	57	16	n	n	nonsevere	moderate	129	0	average	-0.155987	0.224852	-2.5508	0.479217	-0.0589238	0.902993	0.756037	-0.873297	1.28932	1.96542	0.406117	0.744396	0.206725	-0.893443	0.102161	-0.188046	0.133119	-2.02182	-0.801259	-0.841761
p308	patient	f	55	10	n	n	nonsevere	moderate	150	2	average	-0.788514	0.808626	0.799449	0.475309	1.46613	0.902993	0.756037	-0.873297	1.28932	1.96542	-1.95274	-1.76879	-2.40572	-0.370727	-2.5012	-2.59045	1.34628	-2.14438	1.39326	2.47134
p309	patient	m	57	12	n	n	nonsevere	mild	94	1	below average	-1.2102	0.224852	0.570557	0.478811	-1.07562	0.0790934	-0.973934	-1.55392	-0.882086	0.118382	0.861423	1.23145	-0.419611	-0.544965	0.400768	0.154534	-1.29966	-0.247254	-0.869381	-0.620888
p310	patient	f	53	6	n	n	nonsevere	mild	116	0	good	-0.718234	0.224852	1.20993	-2.01207	1.46613	0.902993	0.756037	1.16857	-1.96779	1.34974	-1.46943	-1.25178	1.42912	-0.0222488	0.400768	-0.303689	1.66749	-0.247254	1.63185	-0.620888
p311	patient	m	38	16	n	n	nonsevere	moderate	150	0	good	-1.60388	-1.18774	0.280198	0.578672	1.30202	0.924502	0.588189	1.19186	1.55681	2.3198	0.380943	0.867393	-0.314243	-1.77823	0.0129222	-0.849507	0.651106	1.06393	0.716719	-0.914606
p312	patient	m	47	12	y	n	nonsevere	moderate	149	1	average	-1.32955	0.0387889	-1.08851	0.256857	0.955135	0.275943	0.305069	1.07839	1.02512	0.0877765	0.856495	-2.50453	-2.08551	-0.715025	-3.46621	-1.91411	0.661167	0.457575	-0.0155553	-0.850777
p313	patient	f	73	12	n	n	nonsevere	moderate	149	3	above average	-0.900545	-2.01713	0.171085	-2.41944	-0.705452	-0.550578	-2.32731	-1.09081	-0.652219	0.111823										-0.0625924
p314	patient	m	40	9	n	n	nonsevere	mild	149	1	good	-1.13039	0.0387889	-3.81941	0.664052	1.47825	0.275943	0.305069	1.07839	0.454698	-2.54862	0.856495	-0.239767	0.592284	0.229096	0.360862	0.824009	0.729449	1.07231	0.474543	-0.570937
p315	patient	f	40	16	n	n	nonsevere	mild	151	0	above average	2.32171	0.0387889	-0.843567	0.669824	1.47825	0.940206	0.836475	1.65094	-0.11572	2.06507	0.394165	0.58449	0.859946	0.286859	-0.0125441	0.699372	-0.0743825	1.07231	-0.184859	1.38794
p316	patient	m	59	16	n	y	nonsevere	moderate	150	0	average	0.125136	0.298376	-1.21902	-1.99455	-1.58397	0.902993	0.756037	-1.55392	0.203618	-0.497299	0.406117	0.744396	-0.908568	0.439778	0.102161	0.200791	0.072926	0.516553	0.0802884	-0.400014
p317	patient	f	66	12	n	n	nonsevere	moderate	28	0	below average	-1.02534	-0.179337	0.798683	0.632467	0.580852	-1.24126	0.933234	-0.565067	-0.0953613		-0.704314	1.5163	-0.238919	1.05457	0.552105	0.806797	0.109042	-1.54012	-1.00422	1.07413
p318	patient	f	51	16	n	n	nonsevere	moderate	110	0	average	-1.5616	0.808626	0.778669	-1.99455	1.46613	0.902993	0.756037	1.16857	1.28932	-0.497299	-1.1358	0.744396	-0.908568	1.10639	0.102161	0.200791	-1.08521	0.0826653	-0.244931	3.13396
p319	patient	f	51	5	n	n	nonsevere	moderate	150	1	average	0.265698	0.224852	0.0398884	0.466554	-0.0589238	0.902993	0.756037	-1.55392	-0.339234	0.734062	-1.34861	-1.12253	-1.79452	-1.26835	0.400768	-2.06502	-0.513131	-0.518305	0.465391	-0.841761
p320	patient	m	61	12	n	n	nonsevere	moderate	150	1	good	0.157024	0.416098	1.18194	-1.09719	1.72128	1.2165	0.933234	1.18099	-0.0953613	0.426538	0.805552	1.5163	1.80655	-1.63729	0.552105	0.480126	-0.601542	0.175778	0.587304	-0.982662
p321	patient	f	62	15	n	y	nonsevere	mild	143	1	average	-0.190731	0.491091	0.592875	0.63275	0.0106401	1.2165	0.933234	-0.565067	-0.0953613	-1.2914	0.471967	-0.247978	-0.579528	-0.555208	0.436287	-0.307404	-0.327719	0.86662	-0.172569	-0.982662
p322	patient	m	67	12	n	n	nonsevere	moderate	150	0	average	-0.468934	1.01153	-1.99544	-1.09719	0.0106401	-1.24126	0.314252	-0.565067	-0.0953613		-0.704314	0.0937109	-1.27481	0.381609	0.552105	-0.173215	7.20598	-0.634528	-0.188749	-0.395007
p323	patient	f	40	16	n	n	nonsevere	moderate	150	0	good	2.32171	0.675158	-0.059817	0.669824	-0.0910975	-1.05258	-0.757742	-0.0666977	-0.11572	0.0877765	0.394165	0.58449	-2.58962	-0.391355	-0.0125441	-1.00908	1.944	-0.581154	-0.357535	-0.570937
p324	patient	f	49	9	n	n	nonsevere	mild	123	0	poor	-0.997621	0.0387889	-2.25191	-1.86586	-1.66045	-1.05258	-0.757742	-1.78433	-1.82697	-1.23042	-0.312694	-0.239767	-1.70742	-0.449117	0.360862	-0.88444	-0.241611	-2.89932	-1.81132	5.02587
p325	patient	f	51	7	n	n	nonsevere	moderate	137	0	average	-0.647953	-0.942695	-0.189003	-2.01031	0.957776	0.0790934	0.17938	-1.55392	0.74647	-0.497299	0.861423	-1.38103	-0.923707	-0.109368	0.400768	-0.486543	-2.90057	0.516553	0.257999	2.02959
p326	patient	f	42	9	n	n	nonsevere	moderate	120	0	above average	-1.19678	1.31153	0.0993422	0.664052	-0.0910975	0.940206	0.836475	-0.0666977	-0.11572	-1.23042	-0.312694	-0.239767	-0.55757	0.90731	0.360862	0.396897	0.34199	1.07231	0.66574	1.38794
p327	patient	f	48	16	n	n	nonsevere	mild	149	0	average	1.19314	-1.23395	0.723933	0.669824	-0.0910975	0.940206	0.836475	1.65094	0.454698	2.06507	0.394165	0.58449	0.859946	0.286859	-0.0125441	0.699372	-0.717933	-1.47718	-1.81777	-0.850777
p328	patient	m	52	16	n	y	nonsevere	moderate	146	1	above average	1.24963	-0.285397	0.112774	0.479217	0.957776	-0.744806	0.17938	0.487946	0.203618	-0.497299	0.406117	-2.05725	1.32202	-0.226833	0.102161	-0.188046	0.325703	1.19165	0.12503	0.262606
p329	patient	m	50	9	n	n	nonsevere	mild	149	0	average	-1.5616	-0.358922	0.248	-2.00681	-1.07562	-1.56871	-1.55059	-0.192676	-1.96779	-0.497299	0.861423	-1.63954	1.0624	-0.950218	0.400768	-0.852252	3.86564	1.19165	-0.126685	1.36697
p330	patient	f	44	9	n	n	nonsevere	mild	71	0	average	0.662044	-1.23395	0.0993422	-1.86586	-0.0910975	0.940206	0.836475	-0.0666977	1.59553	-0.571322	-0.312694	-2.07238	-1.70742	0.229096	0.360862	-0.88444	0.0346778	-1.07305	1.40385	-0.291097
p331	patient	m	51	9	n	n	nonsevere	mild	150	1	average	-3.10778	-1.9176	-7.40979	-2.00681	-0.0589238	-1.56871	-0.973934	-0.873297	-0.339234	-1.11298	0.861423	1.23145	-0.0528927	0.383003	0.400768	1.09193	0.569537	0.0826653	-0.052591	-0.841761
p332	patient	f	36	16	n	n	nonsevere	mild	148	0	above average	-0.697615	1.58983	0.974273	-1.2521	0.203534	0.165321	0.588189	-0.747035	-1.06432	-0.385119	0.380943	0.867393	-1.38669	1.1319	0.0129222	0.329175	0.027376	0.314522	-0.675606	-0.689292
p333	patient	m	57	12	n	y	nonsevere	mild	147	0	good	-0.296549	-0.285397	-0.0953374	-2.00156	-0.0589238	0.902993	0.756037	0.487946	-0.339234	0.734062	0.861423	-2.0273	-0.419611	-0.544965	0.400768	-0.62314	5.62078	1.19165	1.02424	-0.841761
p334	patient	m	64	12	n	n	nonsevere	mild	155	0	average	-0.468934	0.416098	0.399523	0.632467	0.0106401	-1.24126	-0.30473	-0.565067	0.500117	-0.146107	-0.704314	0.0937109	-0.238919	1.05457	0.552105	0.153455	-0.0980012	-0.466281	-0.388315	-0.982662
p335	patient	f	44	8	n	n	severe	severe	112	0	average	-0.931235	0.675158	-0.549707	0.662266	0.955135	0.275943	-0.757742	1.07839	-0.11572	0.746875	-0.190002	1.12731	-1.5814	0.995946	0.360862	0.59775	-0.2423	1.07231	-1.04942	0.548424
p336	patient	f	52	16	n	n	nonsevere	mild	164	0	below average	-0.718234	0.224852	0.778669	0.479217	-1.07562	-0.744806	-0.397277	-0.192676	-1.42494	-1.11298	0.406117	-0.899955	1.32202	-2.22666	0.102161	-0.96572	-1.63969	1.19165	-1.31999	0.704353
p337	patient	m	48	14	n	y	severe	severe	133	0	average	-1.39594	-0.517432	-2.14167	0.669824	0.432019	0.275943	-1.28915	-0.0666977	1.02512	1.40597	0.639548	-0.960022	-1.18771	0.464131	0.185642	-0.180258	-0.656805	-0.581154	0.758693	1.1081
p338	patient	f	68	9	n	n	severe	severe	110	1	average	-1.02534	-1.37021	-0.59215	0.628804	0.0106401	0.397245	-0.30473	0.598973	0.500117	0.426538	-0.3428	0.4354	-0.934199	-1.37344	-0.938205	-1.67238		-1.95001	-0.819144	-0.101179
p339	patient	f	61	12	n	n	nonsevere	moderate	116	0	average	-0.747137	1.01153	1.18194	0.632467	0.0106401	0.397245	-1.54269	0.598973	0.500117	-0.146107	-3.77991	0.0937109	-0.238919	-0.291358	0.552105	-0.826557	-0.865028	-1.42927	-1.10339	-0.101179
p340	patient	f	39	15	n	n	nonsevere	mild	137	0	above average	1.74233	-0.49335	0.399487	0.578672	-0.89495	-1.35304	-2.43815	-0.747035	-1.06432	0.155864	0.546698	1.02431	-0.1967	-0.228087	0.095529	0.121043	0.188532	1.06393	0.575332	-0.463977
p341	patient	f	47	16	n	n	nonsevere	mild	142	0	below average	-0.466528	0.0387889	-2.41107	0.669824	1.47825	0.940206	0.305069	1.07839	0.454698	0.0877765	0.394165	-1.24812	-0.289907	0.286859	-0.0125441	-0.154853	0.261455	1.07231	-0.791401	-0.291097
p342	patient	m	38	16	n	n	nonsevere	moderate	145	0	average	-0.00048718	-0.49335	0.974273	0.578672	-0.89495	-1.35304	-0.924978	-0.747035	0.246246	-1.46709	0.380943	0.867393	0.758206	-1.0507	0.0129222	-0.0637195	0.56673	1.06393	-0.650145	1.11322
p343	patient	m	24	18	n	n	nonsevere	mild	138	0	above average	-0.906753	0.201044	-0.652454	-3.08517	-0.89495	-0.593859	-0.168395	-0.747035	-0.409038	0.155864	0.0494331	0.553564	0.523119	-0.513331	-0.152292	-0.0403495	-0.666275	-1.89308	-1.13563	1.56385
p344	patient	f	57	9	n	n	nonsevere	moderate	123	0	below average	-0.507391	-0.942695	0.248	0.473558	-0.567273	-0.744806	-0.397277	-0.873297	-0.339234	0.118382	-1.83192	0.00481408	-2.28348	-0.950218	0.400768	-2.01876	4.07131	0.0826653	-0.317917	1.36697
p345	patient	m	65	12	y	y	nonsevere	moderate	141	0	above average	-0.260281	0.491091	-1.19712							-0.718752	-0.704314	1.5163	-0.238919	-0.964324	0.552105	-0.499886	3.42079	-1.56616	-0.0120562	-0.688835
p346	patient	m	64	12	y	n	nonsevere	moderate	146	0	average	-1.58175		0.000362422																	-0.982662
p347	patient	f	36	15	n	n	nonsevere	mild	106	0	above average	-0.139913	-1.18774	-0.294587	-3.08906	0.752776	-1.35304	-0.924978	-0.100736	-0.409038	1.23783	0.546698	1.02431	0.87575	-0.228087	0.095529	0.121043	-0.453775	-0.167124	-0.900478	0.662593
p348	patient	f	53	8	n	n	nonsevere	moderate	152	0	average	-0.155987	-2.11024	1.20993	0.471807	-1.58397	-0.744806	0.756037	-0.873297	-0.339234	0.734062	-0.169176	1.23145	1.78264	1.13673	0.400768	2.05246	0.28002	-1.62052	-0.532224	1.36697
p349	patient	f	64	14	n	n	severe	critical	126	1	poor	1.40894	-0.774773	-3.33012	0.63275	1.72128	-0.422006	0.314252	-0.565067	-1.28632	0.426538	0.592472	1.31491	-0.465992	0.205708	0.478125	0.499557	-0.268839	-0.0693791	-0.199958	2.24944
p350	patient	m	40	16	n	n	nonsevere	mild	130	0	average	-0.134595	1.31153	-0.843567	0.669824	0.432019	-0.388319	0.305069	-0.0666977	1.02512	-1.23042	0.394165	0.58449	-1.43976	0.286859	-0.0125441	-0.154853	-1.01804	1.07231	-1.3569	-0.291097
p351	patient	f	49	15	n	n	nonsevere	mild	119	0	average	0.0645643	0.0387889	0.858635	0.669824	-0.0910975	-1.05258	-0.757742	-0.0666977	1.59553	0.0877765	0.516857	-1.10407	-0.16388	0.375495	0.0865492	-0.381112	-0.403926	1.07231	-0.656943	0.828264
p352	patient	m	57	12	n	n	severe	severe	160	1	average	1.95244	-0.358922	-0.761232	0.478811	-0.567273	0.902993	0.756037	1.16857	0.74647	1.96542	0.861423	-0.382944	-0.419611	-1.21158	0.400768	-0.62314	4.36594	0.0826653	0.000681069	-0.841761
p353	patient	f	36	16	n	n	nonsevere	mild	132	0	poor	2.36975	-2.57653	0.280198	0.578672	0.752776	0.924502	0.588189	-0.747035	0.90153		0.380943	-1.12887	0.758206	0.404364	0.0129222	0.329175	0.0840496	-1.32137	-1.20553	-0.238663
p354	patient	f	67	9	n	n	nonsevere	mild	153	0	average	-0.747137	-0.179337	0.605331	0.628804	-1.12978	1.2165	-0.30473	0.0169529	0.500117	-0.146107	-0.3428	0.4354	1.13758	-0.700474	0.552105	0.287644	0.535007	-0.466281	-0.142001	-0.982662
p355	patient	m	72	12	n	n	severe	severe	138	1	average	-0.550908	0.353842	0.995039	0.542499	2.07585	1.1769	1.14867	-0.214526	-0.136146	0.111823	0.698141	-0.337106	-0.533973	-0.879052	0.565473	-0.721824	-0.193839	0.748286	-1.25691	-0.716512
p356	patient	m	66	17	y	n	nonsevere	moderate	154	0	average	2.73041	-0.179337	-0.741811	0.356517	0.0106401	-1.24126	-0.923712	1.18099	-1.8818	0.999183	0.230957	0.973216	0.229288	-0.731108	0.352611	-0.287974	0.56801	-0.442298	0.147467	-0.688835
p357	patient	m	73	9	y	y	nonsevere	mild	76	1	above average	0.410594	-0.534823	-0.0284748	0.0532206	-0.0101257	1.1769	1.14867	2.41434	-0.136146	1.30342	0.698141	1.31938	1.14604	1.6326	0.565473	2.12533	1.71217	0.309105	-0.139955	-0.389552
p358	patient	f	64	15	n	n	nonsevere	moderate	163	1	good	-0.0516288	-0.774773	0.592875																	0.486476
p359	patient	m	66	9	y	y	nonsevere	moderate	153	1	average	0.0874729	-1.89065	-0.19299	0.346748	-1.7	-1.24126	-0.923712	0.0169529	-0.0953613	-0.718752	0.805552	1.5163	1.80655	-0.700474	0.552105	1.26766	-0.708659	1.10431	0.286098	-0.688835
p360	patient	f	45	15	n	n	nonsevere	moderate	112	0	average	-1.19678	-0.59758	-0.708866	-1.85514	-1.66045	0.940206	0.836475	-1.78433	-0.11572	-1.23042	0.516857	0.728541	-1.31373	0.375495	0.0865492	-0.808224	0.137702	-1.47718	0.390122	1.66778
p361	patient	f	50	19	n	n	nonsevere	mild	152	0	above average	-0.647953	0.808626	-0.230563	0.479217	-1.07562	0.0790934	-0.973934	0.487946	-0.339234		0.0436341	0.356638	-0.159993	-0.488191	-0.135569	-0.347771	0.118695	-1.14314	-0.271753	-0.179141
p362	patient	m	49	9	n	y	nonsevere	mild	130	0	average	0.794817	-0.517432	-2.25191								-0.312694	-2.07238	-1.70742	0.229096	0.360862	-0.88444		-4.73577	-0.19957	-0.850777
p363	patient	f	54	12	n	n	nonsevere	moderate	120	0	good	-1.5616	-3.27779	-1.42713	0.478811	-1.58397	0.902993	0.756037	1.16857	1.28932	1.34974	-0.652486	-2.0273	-0.419611	-1.87819	0.400768	-1.78965	-0.120516	0.0826653	-0.375202	-0.620888
p364	patient	f	55	11	n	n	severe	severe	151	0	above average	1.39019	0.224852	1.20993	0.47706	-0.0589238	0.0790934	0.756037	0.487946	1.28932	0.734062	0.861423	1.23145	1.78264	1.43467	0.400768	2.05634	-0.359219	1.19165	-0.871988	-0.179141
p365	patient	f	55	9	n	n	nonsevere	moderate	152	0	average	0.546821	-0.942695	-2.41558	0.473558	-1.58397	-1.56871	-0.973934	1.16857	-0.339234	1.34974	0.861423	-1.63954	-2.28348	-1.61683	0.400768	-2.01876	-0.491115	0.0826653	0.206355	0.483479
p366	patient	f	66	9	n	n	nonsevere	moderate	152	0	average	0.64388	1.01153	0.206171	0.628804	0.580852	0.397245	0.314252	0.598973	0.500117	-0.718752	-0.3428	0.4354	0.101691	0.645459	0.552105	0.614315	-0.497746	-0.0693791	-0.512261	1.07413
p367	patient	m	73	9	n	y	nonsevere	moderate	153	0	good	0.148366	0.413565	0.795479	0.536226	-0.0101257	0.313159	1.14867	-0.214526	-0.136146	1.89921	0.698141	-1.62646	-0.11826	-1.26369	0.565473	-0.573612	-1.09582	-1.62392	-0.0151726	1.89917
p368	patient	f	69	12	n	n	nonsevere	moderate	91	1	average	-0.0516288	-1.37021	-1.59628	0.632467	0.0106401	1.2165	0.933234	-0.565067	-0.0953613	-1.2914	0.805552	0.0937109	-0.238919	-1.63729	0.552105	-0.826557	-1.67722	-1.95001	-0.902345	1.07413
p369	patient	f	86	0	n	n	nonsevere	mild	152	1	poor	-2.82355	-2.01713	-2.68704	-2.44454	-1.40078	1.1769	1.14867	-0.214526	1.41207											-0.0625924
p370	patient	f	75	15	n	n	nonsevere	moderate	153	0	average	2.15878	-0.120352	0.370646	-5.37511	-0.0101257	1.1769	1.14867	-0.214526	-0.136146		0.316317	0.952249	0.314615	1.4037	0.434351	1.29482	1.19377	-0.739066	-0.345099	0.591327
p371	patient	m	68	9	n	n	nonsevere	moderate	152	1	average	-0.190731	-1.37021	-0.99131	0.628804	-1.12978	0.397245	-0.30473	-1.72911	-1.28632	-0.146107	0.805552	-1.01359	-0.934199	-0.700474	0.552105	-0.692368	0.161386	1.47723	-0.923123	-0.688835
p372	patient	f	65	6	n	n	nonsevere	moderate	152	0	average	-1.3731	-0.179337	-1.98298	-1.10451		1.2165	0.314252	-0.565067	-1.8818	-0.718752	-3.05688	-0.671898	-0.593589	0.236343	-0.812691	-1.21152		-1.19324	0.550753	-0.101179
p373	patient	f	65	12	n	n	nonsevere	mild	153	1	above average	-0.95579	-1.96564	-0.398798	0.632467	-0.559572	-1.24126	-1.54269	-1.14709	-1.28632	-1.2914	-0.704314	0.0937109	-1.27481	0.381609	0.552105	-0.173215				-0.982662
p374	patient	f	65	12	n	n	nonsevere	moderate	153	0	average	-0.538485	-1.37021	-0.797958	0.632467	0.0106401	1.2165	0.933234	1.18099	-0.0953613	-0.718752	-0.704314	0.0937109	-1.27481	1.05457	0.552105	0.153455	-0.360281	-1.31385	-1.41244	1.95561
p375	patient	m	28	15	y	n	nonsevere	mild	149	0	below average	1.95147	0.895438	0.399487	0.282918	-0.89495	0.165321	0.588189	1.19186	0.90153	-0.385119	0.546698	1.02431	0.87575	1.22698	0.095529	1.29972	-0.793632	0.606244	-0.489545	0.887907
p376	patient	m	49	12	y	y	nonsevere	mild	127	0	average	0.662044	0.755307	-0.304762	0.256857	-0.0910975	0.940206	0.836475	1.65094	-0.11572	1.40597	-0.680769	-0.67192	-0.935652	-1.39324	0.360862	-1.487	1.05329	-1.19589	-1.82489	-0.291097
p377	patient	m	58	12	n	n	nonsevere	mild	145	1	average	-0.929076	-2.69402	-0.0953374	0.478811	-0.567273	-1.56871	-0.973934	-0.873297	-0.339234	0.118382	-0.652486	-0.382944	-1.5349	0.121645	0.400768	-1.01198	-0.267364	1.19165	0.079609	0.704353
p378	patient	m	48	12	n	y	nonsevere	moderate	152	0	average	-1.26317	-1.1538	0.478988	-1.8605	1.47825	0.940206	0.836475	1.65094	-0.11572	0.0877765	-0.680769	1.12731	0.214202	-0.0368113	-18.8664	-1.91411	-0.523323	-0.581154	-0.0837841	-0.850777
p379	patient	f	58	12	n	n	nonsevere	moderate	155	0	below average	-0.647953	-0.358922	-1.42713	0.478811	0.957776	0.902993	-0.397277	1.16857	0.203618	-0.497299	0.861423	1.23145	-0.419611	0.121645	0.400768	0.543371				-0.620888
p380	patient	f	52	9	n	n	nonsevere	moderate	153	0	average	0.968506	-0.358922	0.248	0.473558	-1.07562	-2.3926	0.756037	-2.23454	0.203618	0.118382	-1.83192	-1.63954	-1.16819	1.04961	0.400768	-0.463414	-0.378356	-0.751142	0.319076	-0.400014
p381	patient	f	40	7	n	n	nonsevere	mild	153	0	good	-1.13039	-0.59758	1.1525	0.66048	-1.66045	0.940206	0.836475	-0.0666977	-0.11572	0.746875	0.856495	0.0483342	-1.45537	1.08458	0.360862	0.798604	1.39712	-0.581154	-1.66826	-0.291097
p382	patient	m	51	12	n	y	severe	severe	153	0	above average	-0.999357	-0.869171	-0.0953374	0.478811	-0.0589238	-0.744806	-0.397277	0.487946	-0.339234	-1.11298	-0.652486	-2.0273	-2.6502	-1.21158	-2.65968	-2.95616	-0.477749	-0.247254	0.351176	0.0417324
p383	patient	f	63	12	n	n	nonsevere	mild	153	0	good	0.226575	-1.96564	0.000362422	0.632467	-1.12978	0.397245	0.314252	1.18099	0.500117	-1.2914	0.805552	1.5163	-1.27481	-0.291358	0.552105	0.153455	-1.08532	-0.0693791	-0.685635	0.486476
p384	patient	f	78	2	n	n	nonsevere	mild	161	0	above average	2.07137		-1.18074																	0.918287
p385	patient	m	44	15	n	n	nonsevere	mild	155	1	average	-1.92703	-2.50669	-1.49262	0.669824	-0.0910975	-1.05258	-1.28915	0.505848	1.59553	-1.88952	0.516857	-1.10407	-2.46359	-0.302719	0.0865492	-1.23534	-0.664517	-3.12055	-1.20075	2.78715
p386	patient	f	69	16	n	n	severe	severe	131	1	below average	-1.58175	1.60697	0.125112	0.63275	-1.7	-1.24126	-0.923712	0.598973	-0.0953613	1.57183	-1.18633	1.08711	1.37871	1.37574	0.394449	1.17233	-0.0692516	1.47723	-0.256983	1.66179
p387	patient	f	49	9	n	n	nonsevere	moderate	152	0	good	-1.06401	0.675158	1.23152	0.664052	-0.0910975	0.275943	0.836475	-0.639243	0.454698	-0.571322	-0.312694	-0.239767	-0.55757	-0.449117	0.360862	-0.457328	-0.948635	-0.581154	-0.140213	0.828264
p388	patient	f	52	1	n	n	severe	severe	147	1	average	2.30384	-0.942695	0.497671	0.45955	1.46613	0.902993	0.756037	1.16857	0.203618	-0.497299	-0.865296	-0.605516	-0.190271	-1.58648	-4.86682	-2.11128		-0.247254	1.31744	1.80872
p389	patient	m	32	16	y	y	nonsevere	mild	3	1	good	-0.349051	0.982895	0.974273	-1.55145	-1.44419	0.165321	-0.924978	0.545562	0.246246	-0.385119	0.380943	0.867393	-0.314243	0.404364	0.0129222	0.329175	0.352362	0.606244	1.36012	-0.914606
p390	patient	f	47	12	n	n	nonsevere	moderate	152	0	average	-1.06401	0.675158	1.23152	0.66941	1.47825	-1.05258	0.836475	1.65094	1.59553	-2.54862	0.856495	1.12731	0.214202	1.29907	0.360862	1.50279	-1.78062	0.0657559	-0.178482	0.548424
p391	patient	m	65	19	n	n	nonsevere	mild	160	0	above average	-0.12118	0.416098	0.318464	0.63275	-0.559572	-0.422006	0.314252	0.0169529	-0.0953613	-0.146107	-0.0100533	-0.703563	1.0381	-0.907008	0.268935	-0.268543	0.267246	1.47723	-1.18937	-0.982662
p392	patient	f	53	16	n	n	nonsevere	mild	146	0	below average	-0.43711	-0.942695	-3.2167	0.479217	0.957776	-0.744806	-0.397277	0.487946	-0.339234	-0.497299	0.406117	-0.899955	-0.908568	-0.226833	0.102161	-0.576883	0.438774	1.19165	1.24786	2.91309
p393	patient	f	46	12	n	n	nonsevere	mild	138	0	poor	-2.98922	-2.29669	-9.31789	0.66941	-0.0910975	-0.388319	-0.226336	1.65094	-0.11572	-1.23042	0.856495	1.12731	1.33485	-0.0368113	-7.31625	0.221449	-2.30043	-2.89932	-0.627928	0.828264
p394	patient	f	66	12	n	n	nonsevere	moderate	163	0	average	-1.02534	-0.179337	0.798683	0.632467	-1.12978	1.2165	0.933234	1.18099	0.500117	-0.146107	0.805552	1.5163	-1.27481	1.05457	0.552105	0.806797	-0.078517	-0.279974	-0.949833	1.07413
p395	patient	m	67	9	n	n	severe	critical	153	0	good	-2.41636	-0.774773	-0.19299	0.628804	-0.559572	-1.24126	-0.30473	0.0169529	-0.0953613	-1.2914	0.805552	0.4354	-0.934199	-1.37344	-0.938205	-1.01904		0.175778	-0.646062	0.192648
p396	patient	f	60	12	y	n	nonsevere	mild	103	0	good	2.24355	-0.774773	-0.797958	-1.37924	-1.12978	-1.24126	-1.54269	-0.565067	1.0956	-0.718752	-0.704314	0.0937109	0.796971	0.381609	0.552105	0.480126	0.379862	-1.00745	-0.252396	0.192648
p397	patient	f	64	9	n	n	nonsevere	mild	152	1	average	-1.02534		-2.58795								-1.8806	-1.01359	-0.934199	-2.04641	-5.81476	-2.97906				0.192648
p398	patient	f	57	12	n	n	nonsevere	mild	161	0	average	0.125136	-0.358922	-0.761232	-2.00156	1.46613	0.902993	0.756037	-0.873297	-0.339234	0.118382	-2.1944	-2.0273	-0.419611	0.788255	0.400768	-1.01198	-0.180054	-2.02182	-0.797894	-0.620888
p399	patient	f	48	12	n	n	nonsevere	moderate	153	1	average	-1.32955	-1.87032	-8.92601	0.66941	-0.0910975	-1.05258	-0.757742	1.65094	-0.11572	0.0877765	-2.24647	1.12731	-3.23536	-0.715025	0.360862	-1.91411	0.714513	-2.40879	-0.446593	2.22747
p400	patient	f	65	12	n	n	severe	severe	132	1	average	-1.02534	0.416098	0.798683	-1.09719	0.0106401	1.2165	-0.923712	-0.565067	-1.8818	-0.146107	-3.77991	1.5163	-1.27481	1.05457	0.552105	-0.173215	-0.532521	-0.932101	-0.668078	0.780304
p401	patient	f	56	10	n	n	severe	severe	125	0	average	-0.788514	1.97617	1.20993	0.475309	-0.567273	0.902993	0.17938	-0.192676	-0.882086	-0.497299	0.861423	1.23145	0.940161	1.43467	0.400768	2.05634	0.527046	0.0826653	-1.00983	-0.400014
p402	patient	f	69	9	n	n	nonsevere	moderate	154	0	average	-2.83366	-0.179337	1.00449	0.628804	0.0106401	-1.24126	-2.78066	-0.565067	-0.0953613	-0.718752	0.805552	0.4354	1.80655	1.31843	0.552105	1.921	-0.607862	1.47723	2.04515	-0.395007
p403	patient	f	57	15	n	n	severe	critical	115	0	good	-1.28048	0.808626	-1.77046	0.479217	0.449426	-1.56871	-2.70391	-0.873297	-0.882086		0.526945	-2.05725	-0.786329	-0.139713	-2.89741	-1.56054	-0.336988	0.0826653	-0.33867	1.36697
p404	patient	f	62	12	n	n	nonsevere	moderate	112	1	above average	-0.538485	1.60697	1.18194	0.632467	0.0106401	-1.24126	-0.923712	-0.565067	-0.0953613	-2.43669	0.805552	1.5163	1.80655	1.70716	0.552105	2.07788	0.0476935	1.47723	1.59977	0.192648
p405	patient	f	58	9	n	n	nonsevere	moderate	154	0	average	0.546821	-0.358922	0.913894	0.473558	-0.0589238	-1.56871	-0.973934	1.16857	1.28932	0.118382	0.861423	-1.63954	-0.0528927	0.383003	0.400768	0.31426	0.22724	1.19165	2.12233	-0.400014
p406	patient	f	51	11	n	n	nonsevere	moderate	152	0	average	0.827945	0.224852	0.685003	0.47706	-1.07562	0.902993	0.756037	-0.192676	1.28932	0.734062	0.861423	1.23145	0.817921	-0.457846	0.400768	0.726225	-0.254726	-1.31367	-0.538779	-0.179141
p407	patient	f	71	9	n	n	severe	severe	151	0	average	0.060957	-0.594546	1.39061	0.536226	2.07585	1.1769	-0.589324	1.53805	1.41207	0.111823	-0.616269	0.0607622	-2.64686	0.634423	0.565473	-0.934422		-1.99087	0.00914209	-0.389552
p408	patient	m	38	12	n	n	nonsevere	moderate	124	0	average	-0.558189	-1.88214	0.0632797	0.578371	-0.345708	0.165321	-0.168395	-0.100736	0.90153	-0.926102	1.00554	1.45868	1.20114	-0.670375	0.324204	0.675329	1.41068	-2.77064	-1.39735	-0.914606
p409	patient	f	57	12	n	n	severe	severe	145	0	good	1.53075	-0.942695	-0.761232	-4.48193	-0.0589238	-1.56871	-0.973934	-0.873297	-0.339234	1.34974	-0.652486	1.23145	0.695682	-1.87819	0.400768	-0.62314	0.994688	-1.62052	0.64988	-0.841761
p410	patient	m	22	16	y	n	nonsevere	mild	97	0	below average	-1.53417	-0.49335	-1.10795	0.284213	-1.44419	-1.35304	-1.68156	-2.03963	-1.71961	-0.385119	0.380943	0.867393	0.758206	-0.323168	0.0129222	0.329175	3.40905	-0.143167	-0.126398	-0.0133492
p411	patient	f	50	12	n	n	nonsevere	moderate	161	0	good	0.265698	0.808626	-0.0953374	0.478811	-0.0589238	-0.744806	0.756037	-0.873297	1.28932	2.5811	-0.652486	-0.382944	1.78264	0.788255	0.400768	0.932208	2.37375	-0.518305	-0.131394	-0.841761
p412	patient	m	16	10	n	n	nonsevere	mild	168	0	average	-1.1856	0.201044	-1.08629	0.57578	0.203534	0.165321	0.588189	-0.100736	0.246246	0.696847	1.00554	-0.187385	0.391018	0.974851	0.324204	1.04485	-0.746093	-1.52786	-0.11679	-0.689292
p413	patient	m	61	12	n	n	severe	severe	70	0	average	0.0874729	0.416098	0.399523	0.632467	1.72128	1.2165	0.933234	1.18099	1.69107	-0.718752	0.805552	1.5163	-0.238919	1.05457	0.552105	0.806797	-1.48339	0.175778	-0.185893	-0.688835
p414	patient	f	61	12	n	n	nonsevere	mild	129	0	good	-0.12118	0.416098	1.18194	0.632467	0.0106401	-0.422006	0.933234	-0.565067	0.500117	0.426538	0.805552	-1.35528	-0.238919	1.05457	0.552105	0.480126	-0.432405	0.86662	-0.817782	2.24944
p415	patient	m	61	10	n	y	nonsevere	moderate	126	3	good	0.365676	-0.104344	-0.261592	0.630025	0.580852	-0.422006	-0.923712	0.0169529	1.0956	-1.2914	-0.463305	-1.12748	-1.04774	1.70716	0.552105	0.460695	0.286481	0.474181	-0.71488	-0.982662
p416	patient	f	69	9	n	n	severe	severe	151	0	average	-1.30354	1.01153	-0.19299	-1.10085	-1.7	-2.06051	-2.16168	-0.565067	-1.28632	0.426538	0.805552	0.4354	0.101691	1.31843	0.552105	0.940986		0.86662	0.321155	0.780304
p417	patient	m	72	9	n	y	severe	severe	152	2	average	1.89655	-0.534823	-0.440452	0.536226	-0.0101257	-0.550578	-0.589324	-0.214526	0.895998	0.111823	-2.37644	1.31938	1.14604	-1.26369	0.565473	-0.573612	0.0657576	-1.06592	-0.714319	-0.389552
p418	patient	f	39	12	n	n	nonsevere	mild	144	0	average	0.626928	0.201044	0.757354	0.578371	-1.44419	0.165321	0.588189	1.19186	1.55681	-0.926102	1.00554	1.45868	-0.916518	1.49018	0.324204	1.06822	0.370491	-0.167124	-0.788545	0.437279
p419	patient	f	59	15	n	n	nonsevere	moderate	142	0	average	0.125136	0.224852	0.22722	0.479217	-0.567273	0.902993	0.17938	-0.192676	-1.42494	-0.497299	0.526945	0.873649	-0.786329	-0.139713	0.181404	-0.00519156	-0.603583	0.0826653	0.0946858	3.57571
p420	patient	f	58	12	n	n	nonsevere	moderate	94	2	poor	-0.718234	0.224852	-4.0907	0.478811	-0.0589238	-1.56871	0.17938	-0.873297	0.74647	1.34974	0.861423	-0.382944	-0.419611	0.121645	0.400768	-0.234303	1.14216	-2.02182	-0.5876	1.36697
p421	patient	f	53	11	n	n	nonsevere	moderate	134	0	average	-0.43711	1.97617	0.685003	0.47706	-0.0589238	-0.744806	0.756037	-0.873297	-0.339234	-1.72866	0.861423	-1.89804	-0.297371	0.208764	0.400768	-0.440286	-0.945439	0.516553	-0.271675	0.704353
p422	patient	m	63	12	n	n	nonsevere	mild	155	1	above average	-1.85995	1.01153	0.798683	0.632467	1.72128	1.2165	0.933234	-0.565067	1.69107	-0.146107	0.805552	1.5163	1.80655	1.05457	0.552105	1.78681	0.283654	1.47723	-0.447129	-0.688835
p423	patient	m	61	16	n	n	nonsevere	mild	155	1	average	-1.09489	-0.179337	0.524272	0.63275	-0.559572	1.2165	0.314252	0.598973	-0.69084	-1.86404	0.351462	-1.38167	-0.693065	0.702775	0.394449	-0.461024	-0.306648	0.86662	-0.407705	-0.982662
p424	patient	m	61	9	n	n	nonsevere	moderate	154	1	average	-1.30354	-0.774773	0.605331	0.628804	0.0106401	-1.24126	-0.923712	-0.565067	-0.0953613	0.999183	-0.3428	-1.01359	0.101691	-1.37344	0.552105	-1.01904		-0.466281	-0.769344	-0.982662
p425	patient	f	29	15	n	n	nonsevere	mild	170	0	above average	-0.558189	-0.49335	0.399487	-1.2534	1.30202	0.165321	0.588189	1.19186	0.90153	0.155864	-1.56854	-0.971957	0.87575	0.499445	0.095529	-0.271851	1.26134	-1.09271	0.438106	-0.463977
p426	patient	m	84	12	n	n	severe	critical	164	1	below average	-2.29909	-1.54293	-2.30078	-2.41944	-0.0101257	0.313159	0.569337	1.53805	-0.136146	0.111823	-2.79023	-2.02433	-0.533973	-1.51176	-1.26388	-2.88668	1.39569	-0.139871	-0.608491	-0.0625924
p427	patient	m	63	16	n	n	nonsevere	moderate	157	1	good	-0.260281	1.01153	-0.274049	0.63275	0.0106401	1.2165	0.933234	1.18099	-0.0953613	-0.718752	-2.72413	-1.38167	0.342825	0.0298082	0.394449	-1.11437	0.823835	1.47723	0.256398	0.192648
p428	patient	m	66	9	y	n	severe	severe	131	1	good	1.13074	0.416098	-0.99131	0.346748	0.0106401	1.2165	0.933234	1.18099	1.69107		0.805552	-1.01359	0.101691	-0.700474	0.552105	-0.365697	-0.766321	-0.652893	-0.577954	-0.395007
p429	patient	f	63	12	n	n	nonsevere	moderate	148	0	average	0.574329	-1.96564	0.399523	-1.09719	-1.7	1.2165	0.933234	-0.565067	1.69107	-0.718752	-0.704314	0.0937109	-1.27481	-1.63729	0.552105	-1.80657	1.77248	-1.42927	-0.97534	-0.688835
p430	patient	f	61	12	n	n	nonsevere	moderate	144	2	above average	-1.02534	-0.179337	0.000362422	0.632467	-1.7	1.2165	0.933234	1.18099	-0.0953613	-0.146107	0.805552	0.0937109	1.80655	-1.63729	0.552105	0.153455	1.25083			0.780304
p431	patient	m	58	14	y	n	nonsevere	moderate	126	0	above average	-1.06964	-0.942695	-0.324229	0.0778382	-0.567273	-1.56871	-0.973934	-0.192676	-0.339234	1.34974	0.647772	-2.05725	0.451203	-0.0525939	0.260647	-0.600011	-0.578167	0.104247	0.256475	-0.400014
p432	patient	m	67	16	n	y	nonsevere	mild	150	1	below average	-1.23399	-0.104344	-1.87069	-1.0923	0.0106401	-1.24126	0.933234	-0.565067	-0.0953613	-1.86404	0.351462	-1.38167	-1.72895	-3.33502	0.394449	-2.74772	-0.502176	0.175778	-0.684873	2.54327
p433	patient	f	65	12	n	n	nonsevere	mild	154	1	above average	-1.23399	-1.96564	-1.59628	0.632467	0.0106401	0.397245	-0.30473	0.598973	-0.0953613	-0.718752	0.805552	0.0937109	-0.238919	-2.98322	-1.06372	-1.80657		-0.0693791	0.966911	-0.395007
p434	patient	m	65	12	n	n	nonsevere	mild	117	1	good	0.365676	-0.179337	1.18194	0.632467	0.0106401	1.2165	0.933234	1.18099	-1.8818	-1.2914	0.805552	1.5163	0.796971	1.05457	0.552105	1.46014	0.908453	0.86662	-1.06797	-0.982662
p435	patient	m	65	9	y	n	nonsevere	mild	155	2	average	0.574329		1.00449																	-0.395007
p436	patient	m	73	16	n	n	severe	severe	14	0	above average	0.672822	0.828035	-0.112137	0.542983	2.07585	1.1769	1.14867	-0.214526	-0.136146	1.89921	-1.58178	0.819627	0.176044	0.0556046	-1.45335	-0.318091	1.66337	-0.557425	-1.5264	0.264367
p437	patient	f	48	15	n	n	nonsevere	moderate	152	0	above average	0.595657	0.0387889	0.0748843	-1.85514	1.47825	0.940206	-0.757742	1.65094	-0.11572	-2.54862	0.516857	0.728541	-1.31373	-0.980933	0.0865492	-0.808224	-0.143951	-3.3298	-1.59707	0.548424
p438	patient	f	58	12	n	n	severe	severe	152	0	below average	0.546821	-0.942695	-0.0953374	-2.00156	0.449426	0.902993	-0.397277	0.487946	0.203618	1.34974	0.861423	-0.382944	-0.419611	-1.87819	0.400768	-1.40081	5.55153	-0.247254	-0.109049	0.262606
p439	patient	f	34	16	n	n	nonsevere	moderate	123	0	average	0.278364	-1.18774	-0.413876	0.578672	-1.99343	0.924502	0.588189	-2.68593	-0.409038	0.155864	0.380943	0.867393	-1.38669	-1.0507	0.0129222	-0.849507	5.87484	1.06393	0.449003	0.662593
p440	patient	m	56	12	n	n	nonsevere	mild	144	1	below average	0.968506	0.224852	0.570557	0.478811	-0.0589238	-1.56871	0.756037	0.487946	-0.339234	-0.497299	-0.652486	-0.382944	-0.419611	0.121645	0.400768	-0.62314		-0.751142	0.366652	-0.179141
p441	patient	f	58	15	n	n	severe	severe	124	1	below average	-2.19413	0.224852	-3.10225	0.479217	-1.58397	-2.3926	0.17938	-0.873297	0.203618		-4.0988	-0.770702	-1.90162	-0.806324	0.181404	-2.33821		-0.957126	-1.03186	0.483479
p442	patient	m	66	15	n	n	nonsevere	mild	141	1	average	-0.95579	0.416098	-0.205446	0.63275	1.15106	1.2165	0.314252	0.598973	1.69107	0.426538	0.471967	-0.247978	0.456361	1.46369	0.436287	0.999278	0.511321	0.86662	-0.347666	0.192648
p443	patient	m	69	12	n	n	nonsevere	mild	153	0	average	-0.747137	-0.774773	0.798683	0.632467	-0.559572	-1.24126	0.314252	0.0169529	0.500117	0.999183	-0.704314	0.0937109	0.796971	0.381609	0.552105	0.480126	-0.796993	-0.279974	-1.10982	2.8371
p444	patient	f	63	12	n	n	nonsevere	moderate	153	1	average	0.574329	2.2024	0.399523	0.632467	-1.12978	-1.24126	-0.923712	-0.565067	-0.0953613	-0.146107	0.805552	0.0937109	-1.27481	-0.964324	0.552105	-0.826557	0.00987968	1.47723	-0.111747	-0.688835
p445	patient	f	57	12	n	n	nonsevere	mild	141	0	above average	1.10907	0.808626	1.20993	0.478811	-1.58397	0.902993	0.756037	-0.873297	-1.96779	-0.497299	-0.652486	-0.382944	-0.419611	1.43467	0.400768	0.543371	-0.252516	1.19165	-0.00179503	1.58785
p446	patient	f	63	12	n	n	nonsevere	moderate	153	0	above average	-1.30354	-0.774773	0.399523	0.632467	0.0106401	1.2165	0.933234	1.18099	-0.0953613	-0.146107	0.805552	0.0937109	-0.238919	-0.291358	0.552105	-0.173215	0.126709	0.474181	0.154584	0.192648
p447	patient	m	64	16	n	n	nonsevere	moderate	152	1	average	1.47849	-0.179337	-2.66901	-1.0923	0.0106401	1.2165	0.314252	-1.14709	1.0956	-0.718752							0.678083	-0.466281	-0.969444	2.54327
p448	patient	f	50	9	n	n	nonsevere	moderate	144	1	average	-0.577672	0.224852	-1.08379							-1.11298	0.861423	1.23145	1.0624	0.383003	-2.42195	1.09193	0.652029	0.0826653	0.192013	3.13396
p449	patient	f	62	12	n	n	nonsevere	moderate	155	0	good	0.852532	-1.37021	0.399523	0.632467	-0.559572	1.2165	0.933234	0.0169529	-0.0953613	0.426538	0.805552	-1.35528	-2.3107	-0.291358	0.552105	-0.826557	-1.90183	0.175778	-0.353553	-0.982662
p450	patient	f	61	9	n	n	nonsevere	mild	154	1	average	-0.329832	-0.179337	-0.59215	0.628804	-1.7	1.2165	0.933234	1.18099	1.69107	-0.718752	-0.3428	-1.01359	0.101691	-2.04641	0.552105	-1.34571	4.10569	-0.634528	-0.0852513	0.780304
p451	patient	m	68	9	n	n	nonsevere	moderate	153	0	above average	1.40894	1.01153	0.605331	0.628804	0.0106401	1.2165	0.933234	1.18099	-1.8818	0.999183	0.805552	-1.01359	0.101691	-0.0275075	0.552105	-0.0390264	0.127679	1.47723	0.510187	-0.688835
p452	patient	m	69	12	y	y	severe	severe	151	0	poor	-2.83366	-1.69416	-4.19082	-1.37924	-1.12978	1.2165	0.314252	0.0169529	-0.0953613	1.57183	-0.704314	1.5163	1.80655	1.70716	0.552105	1.78681	0.341959	-0.8392	-0.401992	1.36796
p453	patient	m	64	15	n	n	nonsevere	moderate	153	0	average	-1.02534	-0.179337	0.193714	0.63275	0.0106401	1.2165			-0.0953613	-0.718752	-1.06583	1.20101	-0.579528	-0.555208	0.436287	-0.307404	0.192871	0.86662	0.570126	-0.982662
p454	patient	m	38	16	n	n	severe	severe	115	0	average	-1.11589	-1.88214	-0.413876	0.578672	-0.345708	0.924502	0.588189	1.19186	-0.409038	-0.385119	0.380943	0.867393	0.758206	1.1319	0.0129222	1.11496	-1.24074	1.06393	-0.864489	-0.689292
p455	patient	m	39	17	n	n	severe	severe	149	0	above average	-0.279338	0.895438	-0.533165	0.578672	-0.345708	-1.35304	-1.68156	-0.747035	-0.409038	0.155864	0.215188	0.710478	-0.431787	0.309282	-0.0696847	0.144413	0.423327	-0.167124	-0.0989189	-0.689292
p456	patient	m	61	11	n	n	nonsevere	mild	153	1	above average	-0.468934	1.60697	0.468125	0.631246	0.0106401	-1.24126	-0.923712	-0.565067	-0.0953613	-0.146107	0.805552	1.5163	0.910507	0.469559	0.552105	1.28709	-0.671793	1.47723	-0.181582	-0.101179
p457	patient	f	56	12	n	n	nonsevere	mild	136	0	good	0.617102	1.97617	0.570557	-2.00156	-0.0589238	0.902993	0.756037	1.16857	1.28932	0.734062	0.861423	-0.382944	0.695682	0.788255	0.400768	0.932208	2.0025			-0.841761
p458	patient	m	54	16	n	n	nonsevere	mild	152	0	average	-0.0154253	0.224852	-0.553121	-1.99455	-0.0589238	0.0790934	-0.397277	-0.873297	0.74647	0.734062	0.406117	-0.899955	-2.02386	0.439778	0.102161	-0.96572	0.372341	0.0826653	-0.872826	0.483479
p459	patient	f	52	12	n	n	severe	severe	134	1	average	-0.718234	0.224852	-2.75892	0.478811	-1.58397	0.902993	0.756037	1.16857	-0.339234	-3.5757	0.861423	-0.382944	-2.6502	-2.5448	0.400768	-2.17849	0.743284	0.516553	0.682788	-0.841761
p460	patient	m	44	13	n	y	nonsevere	moderate	157	0	average	-0.200982	0.118937	-3.57446	0.669824	-0.614214	0.940206	0.836475	1.07839	-1.82697	-2.54862	0.76224	-0.815971	0.0881744	-0.125447	0.284736	0.0205951	0.696345	1.07231	-1.10787	-0.570937
p461	patient	m	70	9	n	n	nonsevere	moderate	152	2	average	0.84764	0.828035	0.383502	-2.42572	-0.0101257	1.1769	1.14867	2.41434	-0.136146	0.70762	0.698141	0.0607622	1.14604	0.634423	0.565473	1.23044	-1.33575	0.108143	-1.17714	0.591327
p462	patient	m	43	12	n	n	nonsevere	moderate	148	0	average	-0.931235	1.31153	1.23152	-1.8605	-1.66045	-1.05258	-0.757742	-1.78433	-0.11572	-0.571322	0.856495	1.12731	1.33485	1.29907	0.360862	1.88335	-0.646504	-0.581154	1.01868	-0.850777
p463	patient	f	63	13	n	n	severe	severe	145	0	average	0.435227	1.60697	0.73008	-4.55527	-1.12978	1.2165	0.933234	0.598973	-1.28632	-0.146107	0.712977	1.4288	-0.352455	-0.379308	0.519963	0.326506	-0.566851	-1.8517	-0.742293	-0.101179
p464	patient	f	54	9	n	n	nonsevere	moderate	172	0	average	-0.577672	0.224852	0.913894	0.473558	-1.58397	-1.56871	-0.973934	1.16857	1.28932	1.96542	0.861423	0.00481408	1.78264	1.43467	0.400768	2.05634	2.00309	0.0826653	-0.895452	-0.400014
p465	patient	f	35	15	n	n	nonsevere	moderate	138	0	average	-1.04618	-1.18774	1.09356	0.578672	-0.345708	0.165321	-0.168395	0.545562	0.246246	-0.926102	-1.56854	1.02431	-0.1967	1.22698	-6.32348	-0.271851	3.62697	-2.50325	-0.756888	1.33854
p466	patient	f	65	12	n	n	nonsevere	moderate	153	0	good	-1.16444	0.416098	1.18194	0.632467	0.0106401	-1.24126	0.933234	-0.565067	-0.0953613	-1.86404	0.805552	-1.35528	-2.3107	-0.964324	-1.06372	-1.4799	-0.792449	1.47723	-0.358554	-0.688835
p467	patient	f	58	12	n	n	nonsevere	moderate	172	0	average	-1.49132	0.224852	-0.0953374	0.478811	-1.58397	-1.56871	0.17938	1.16857	-1.96779	0.118382	-0.652486	-0.382944	0.695682	0.121645	0.400768	0.154534	0.748531	-0.247254	-0.364185	1.58785
p468	patient	f	57	12	n	n	nonsevere	moderate	144	2	average	-2.33469	-2.11024	-0.761232	0.478811	-0.0589238	0.902993	0.756037	1.16857	-1.96779	-0.497299	0.861423	-2.0273	-1.5349	0.121645	0.400768	-1.40081	-0.0859395	-1.89421	-0.607294	1.80872
p469	patient	f	66	12	n	n	severe	severe	113	1	poor	-0.747137	1.01153	-0.398798	0.632467	-1.7	1.2165	-0.923712	1.18099	-0.0953613	-0.718752	0.805552	0.0937109	-1.27481	1.05457	0.552105	0.480126	1.07042	-0.0693791	-0.0643279	0.486476
c001	control	f	30	16	n	n	n/a	n/a	n/a	0	average	-0.0701999	-1.18774	0.15507							-0.926102	0.154854	0.65435	0.788484	1.06111	-2.97938	0.243569				-0.689292
c002	control	f	30	17	y	y	n/a	n/a	n/a	0	below average		0.530232	-2.07965	-1.07136	-0.345708	0.924502	0.588189	-0.747035	-0.409038	1.23783	-0.0708992	0.440898	0.678976	0.947246	0.205156	0.821877	2.66032	0.573745	0.0353279	-0.914606
c003	control	f	47	14	n	n	n/a	n/a	n/a	0	good	-1.72787	-0.59758	0.927034	0.56791	0.432019	-1.05258	-0.226336	0.505848	0.454698	0.0877765	0.56102	0.780817	1.12723	1.11138	0.307904	1.48452	-0.363789	-0.581154	-0.461368	-0.850777
c004	control	f	49	12	n	n	n/a	n/a	n/a	0	average	0.861203	0.0387889	-0.296071	0.669824	0.432019	-0.388319	-0.226336	0.505848	-0.11572	-1.23042	0.856495	1.12731	0.212205	-0.0327528	0.360862	0.654285	1.6182	-1.07305	-0.479385	-0.570937
c005	control	f	42	15	n	n	n/a	n/a	n/a	0	good	-1.26317	-0.59758	0.754836	0.510273	0.432019	-1.05258	-1.82055	-0.0666977	-0.11572	-0.571322	0.393917	0.584864	-0.140032	0.32702	0.277954	0.404748	2.05483	-1.07305	-1.05521	-0.291097
c006	control	f	43	16	n	n	n/a	n/a	n/a	0	good	-0.333755	0.675158	0.582638	0.452637	-1.13733	0.275943	0.836475	-0.639243	1.02512	0.0877765	0.226814	-1.4437	-0.257444	0.899087	0.248005	0.179198	-0.172563	1.07231	-0.516708	-0.291097
c007	control	f	48	16	n	n	n/a	n/a	n/a	0	average	0.130951	1.31153	-0.201112	0.452637	-0.0910975	0.940206	-2.35196	1.07839	1.59553	2.06507	0.226814	-1.4437	-0.257444	-1.13555	0.248005	-1.10214	-0.112714	0.0657559	0.368617	-0.850777
c008	control	f	59	15	n	n	n/a	n/a	n/a	0	below average	2.093	0.808626	-0.526865	0.322791	-1.07562	-0.744806	-0.397277	-0.873297	0.74647	-0.497299	0.405873	0.744733	-0.763197	-0.187358	0.334468	-0.06743	-1.38063	0.0826653	-0.310992	-0.179141
c009	control	f	52	17	n	n	n/a	n/a	n/a	0	good	0.968506	0.808626	0.512317	0.209775	1.46613	0.902993	0.756037	1.16857	1.28932	0.734062	0.076745	0.393087	-0.990963	-1.06263	0.286567	-0.866942	1.86963	-0.518305	-0.982328	-0.400014
c010	control	m	64	12	y	y	n/a	n/a	n/a	2	good	-0.538485	0.102938	0.403949	-0.724968	0.0106401	-1.24126	0.933234	1.18099	1.69107	-0.718752	-0.694205	1.5163	0.795172	0.385636	-1.07048	0.484504	0.000869679	0.685392	-0.606186	-0.688835
c011	control	f	41	17	n	n	n/a	n/a	n/a	0	good	0.861203	1.9479	0.410441	0.395001	-1.13733	-1.05258	-0.226336	-0.0666977	-0.686138	-1.23042	-3.07169	0.192959	-0.374856	-0.563487	0.218055	-1.32769	0.278745	1.07231	-0.8274	-0.570937
c012	control	f	45	16	n	n	n/a	n/a	n/a	0	average	-0.864848	-0.59758	0.582638	0.452637	-0.0910975	0.940206	0.836475	0.505848	0.454698	0.0877765	-1.33889	0.388912	0.89241	0.220873	0.248005	0.179198	-0.538472	-0.581154	0.0637039	0.548424
c013	control	m	69	6	n	n	n/a	n/a	n/a	1	poor	0.852532	-1.96564	-1.46482																	0.486476
c014	control	f	49	15	n	n	n/a	n/a	n/a	0	average	1.59146	0.0387889	0.754836	0.510273	1.47825	0.275943	0.836475	1.07839	1.59553	0.746875	0.393917	0.584864	-0.140032	-0.351193	0.277954	-0.0223644	1.35211	1.07231	0.923777	0.548424
c015	control	m	43	14	n	n	n/a	n/a	n/a	0	average	-0.200982	0.0387889	-1.42422	0.56791	-0.0910975	-0.388319	-0.226336	-0.639243	-0.11572	-0.571322	0.56102	-1.0518	-0.0226194	-0.245047	0.307904	-0.223927	-0.617258	-0.581154	1.55443	0.548424
c016	control	f	60	12	n	n	n/a	n/a	n/a	1	good	0.64388	-0.179337	0.403949	0.63275	-1.12978	-1.24126	-0.30473	-0.565067	-0.0953613	0.426538	0.805552	0.103222	1.80655	1.0586	0.552105	1.46452	-0.176207	1.47723	-0.833693	-0.688835
c017	control	f	50	15	n	n	n/a	n/a	n/a	0	above average	-0.366829	0.808626	0.804924	0.322791	-1.58397	0.902993	-0.973934	-0.873297	1.28932	-0.497299	0.405873	0.744733	-0.763197	1.14586	0.334468	0.321407	0.0722584	1.19165	-0.785448	0.262606
c018	control	f	49	15	n	n	n/a	n/a	n/a	0	average	-0.400142	-1.23395	-2.38016	0.510273	-1.13733	0.940206	0.305069	0.505848	0.454698	-1.88952	0.393917	0.584864	-2.43974	1.00523	0.277954	-0.0223644	-1.13877	0.0657559	-1.44676	1.1081
c019	control	f	49	14	n	n	n/a	n/a	n/a	1	average	-0.400142	-0.59758	0.927034	-1.962	-1.13733	0.940206	0.836475	-0.0666977	-0.11572	-1.88952	0.56102	0.780817	-0.0226194	1.11138	0.307904	1.05741	0.755767	-1.07305	-0.191303	-0.291097
c020	control	f	29	16	n	n	n/a	n/a	n/a	0	above average	1.81204	1.58983	0.15507	0.421085	0.752776	0.924502	0.588189	0.545562	-1.06432	-0.385119	0.154854	0.65435	-0.283965	-1.84902	0.230123	-0.935113	-0.0837515	-0.533358	-1.25083	-0.914606
c021	control	f	52	12	n	n	n/a	n/a	n/a	0	above average	-0.577672	-0.358922	-0.0879537	0.479217	-0.0589238	0.902993	0.756037	-0.873297	-0.339234	0.118382	-0.642349	-0.37215	1.78264	0.792245	0.400768	0.937419	0.260181	-0.518305	-0.925636	-0.841761
c022	control	f	52	15	n	y	n/a	n/a	n/a	1	average	-1.28048	-0.0821748	0.804924	0.322791	0.449426	-0.744806	0.17938	-0.873297	1.28932	-1.11298	-1.13604	-0.899619	0.352096	-1.52058	-2.74435	-1.62278		-1.47214	-0.39034	2.25047
c023	control	f	27	16	y	y	n/a	n/a	n/a	0	average	-0.558189	-1.55295	0.849144	0.578672	-0.89495	0.165321	-0.168395	-1.39333	0.246246	-0.385119	0.154854	0.65435	0.788484	1.06111	0.230123	1.02936	0.30533	-1.45793	-0.618848	1.11322
c024	control	f	52	15	n	n	n/a	n/a	n/a	0	average	0.40626	0.808626	0.13903	-2.15758	-1.07562	-1.56871	-1.55059	-1.55392	0.74647	0.118382	0.405873	0.744733	0.352096	0.479252	0.334468	0.710244	-0.579048	1.19165	-0.741043	0.0417324
c025	control	f	28	16	n	n	n/a	n/a	n/a	0	good	-0.697615	-0.49335	-0.539004	0.421085	-0.345708	0.924502	0.588189	1.19186	1.55681	0.696847	0.154854	-1.34191	-2.42886	0.33358	0.230123	-0.935113	-0.606332	1.06393	0.900584	-0.914606
c026	control	f	47	15	n	n	n/a	n/a	n/a	0	good	-0.0682088	1.31153	-0.0289142	0.510273	-1.66045	0.940206	0.836475	-1.78433	-0.11572	0.746875	0.393917	0.584864	1.00982	-0.351193	0.277954	0.404748	0.298776	1.07231	-1.02969	0.548424
c027	control	f	57	16	n	n	n/a	n/a	n/a	0	average	1.17935	0.808626	0.658621	0.266283	-0.0589238	0.0790934	-0.397277	-0.873297	-0.339234	1.96542	0.241309	-1.07544	-0.87708	0.374921	0.310518	-0.272767	0.239423	0.516553	0.558991	0.483479
c028	control	f	49	9	n	n	n/a	n/a	n/a	0	average	-0.200982	-1.87032	-2.13073	-1.67382	1.47825	-3.04537	0.836475	-1.78433	1.59553		0.856495	-1.90465	-1.73527	-2.42717	-3.39239	-2.94019		1.07231	0.0291699	-0.291097
c029	control	f	52	11	n	n	n/a	n/a	n/a	0	average	2.093	-0.358922	0.724244	0.479217	-0.0589238	0.902993	0.756037	-0.873297	1.28932	-0.497299	-0.477785	-0.196328	0.807628	0.896575	0.400768	0.753919	0.517959	-0.518305	-0.492188	-0.620888
c030	control	m	30	12	y	n	n/a	n/a	n/a	0	good	0.278364	0.895438	-0.623099	0.578672	-1.99343	0.165321	-1.68156	-1.39333	-1.06432	0.155864	1.00554	1.45868	1.20114	0.789042	0.324204	1.46638	-0.843861	1.06393	1.16018	-0.914606
c031	control	m	58	12	y	y	n/a	n/a	n/a	0	average	0.476541	0.501599	0.577941	0.479217	-1.58397	0.902993	0.756037	1.16857	-0.339234	-0.497299	0.861423	1.23145	0.693745	1.43467	0.400768	1.71509				-0.841761
c032	control	m	60	12	y	n	n/a	n/a	n/a	3	above average	0.713431	0.416098	0.803109	-0.724968	-1.7	-1.24126	-0.923712	-2.31113	-0.0953613	-0.146107	0.805552	1.5163	1.80655	-0.287331	-2.696	0.157833	0.484692	-0.25507	-0.365497	0.486476
c033	control	m	62	12	y	n	n/a	n/a	n/a	0	average	-0.538485	1.01153	1.18194	0.63275	0.0106401	1.2165	0.933234	1.18099	-1.8818	0.426538	0.805552	1.5163	-0.240717	-0.287331	0.552105	0.484504	-0.772223	1.47723	-0.0707815	-0.395007
c034	control	m	31	12	y	y	n/a	n/a	n/a	0	average	0.348077	-0.164162	-0.623099	0.578672	1.30202	0.924502	0.588189	1.19186	1.55681	1.23783	1.00554	1.45868	1.20114	0.0615106	0.324204	1.07349	-0.226925	0.573745	0.358376	-0.914606
c035	control	m	31	15	y	y	n/a	n/a	n/a	0	average	-0.209625	-0.164162	1.00164	0.578672	1.30202	0.924502	0.588189	1.19186	1.55681	0.155864	0.380608	0.867801	0.897993	1.17498	0.25509	1.23684	0.432426	-0.575022	-0.0589198	-0.914606
c036	control	m	31	15	y	n	n/a	n/a	n/a	0	above average	0.348077	0.895438	1.00164	0.578672	-0.345708	0.924502	0.588189	1.19186	-0.409038	0.696847	0.380608	0.867801	0.897993	1.17498	0.25509	1.23684	-1.03878	0.0920985	0.722393	-0.914606
c037	control	f	27	12	y	y	n/a	n/a	n/a	0	good	-0.00048718	1.58983	0.76505	0.578672	0.752776	0.924502	0.588189	-0.747035	0.246246	0.155864	-1.05737	1.45868	1.20114	0.0615106	0.324204	0.680594	-0.440433	0.573745	1.09478	-0.689292
c038	control	m	66	11	y	y	n/a	n/a	n/a	1	average	-0.677587	0.102938	-0.306672	0.63275	0.580852	1.2165	0.933234	-0.565067	-0.0953613	-1.2914	-0.53008	1.5163	-0.134942	0.490961	-1.05784	0.330342	-0.476111	-1.10264	-0.0633045	-0.101179
c039	control	m	58	9	y	y	n/a	n/a	n/a	0	average	0.757664	1.08537	-0.980832	0.479217	0.957776	0.902993	0.756037	-0.192676	-0.882086	0.734062	0.861423	1.23145	1.03539	1.10524	0.400768	1.55343	-0.525217	0.750071	2.1187	0.483479
c040	control	f	56	9	n	n	n/a	n/a	n/a	0	average	-0.296549	0.224852	1.01685	0.479217	-1.58397	0.902993	0.756037	-0.873297	0.74647	-2.34434	0.861423	0.155318	1.03539	-0.894594	0.400768	-0.00191721	0.00979136	1.19165	-0.203889	-0.841761
c041	control	f	56	9	n	n	n/a	n/a	n/a	1	above average	-0.999357	0.808626	0.350957	0.479217	-0.0589238	0.902993	-2.70391	-0.873297	-0.339234	0.118382	-1.69057	-1.48903	-2.31048	-0.227984	0.400768	-1.9461	0.335015	-0.518305	2.6062	-0.841761
c042	control	f	77	12	n	n	n/a	n/a	n/a	0	good	1.45951	0.353842	0.999607	0.542983	0.6852	1.1769	1.14867	-0.214526	1.41207	-0.483973	-1.01849	-0.326031	0.728133	0.390144	0.565473	0.365441	-0.602553	1.92956	2.24011	-0.716512
c043	control	m	56	9	n	n	n/a	n/a	n/a	0	average	-0.296549	-0.358922	-2.97852	0.479217	1.46613	0.902993	0.756037	-0.873297	0.203618	0.734062	-0.148658	1.23145	1.03539	1.10524	0.400768	1.16459	-0.742286	0.516553	-0.105643	0.925226
c044	control	m	63	9	y	y	n/a	n/a	n/a	0	average	0.852532	0.698373	0.667047	0.63275	-1.12978	1.2165	0.933234	-0.565067	-0.0953613	0.426538	-0.201832	0.568022	1.1125	1.37458	0.552105	1.3287	-0.662889			-0.982662
c045	control	f	62	12	n	n	n/a	n/a	n/a	1	good	-0.468934	-0.179337	0.00478847	0.63275	0.0106401	1.2165	0.933234		-0.0953613	0.426538	0.805552	-1.34576	-0.240717	-1.63326	-2.696	-1.47552	-0.274254	0.86662	0.815173	-0.982662
c046	control	m	62	12	y	n	n/a	n/a	n/a	1	good	1.20029	1.01153	0.803109																	-0.982662
c047	control	m	56	9	n	n	n/a	n/a	n/a	0	above average	0.40626	1.3924	0.350957	0.479217	1.46613	0.902993	0.756037	1.16857	1.28932	1.34974	0.861423	0.155318	1.03539	1.43467	0.400768	1.94227	-0.0699467	1.19165	1.13324	-0.841761
c048	control	m	53	15	n	n	n/a	n/a	n/a	0	above average	1.17935	0.808626	0.13903	0.322791	-1.58397	0.902993	0.756037	1.16857	1.28932	0.118382	0.405873	0.744733	0.352096	1.14586	0.334468	1.09908	-0.385615			-0.841761
c049	control	m	59	16	y	y	n/a	n/a	n/a	1	average	-0.43711	1.08537	-0.673168	-1.69382	-1.58397	0.902993	0.756037	1.16857	-0.339234	0.734062	0.241309	0.56891	1.35351	1.04153	-2.7683	0.893744	-0.0613659			-0.841761
c050	control	m	31	12	y	y	n/a	n/a	n/a	0	good	0.348077	0.530232	-1.31717	0.578672	0.752776	-1.35304	0.588189	-0.747035	-0.409038	1.77881	-1.05737	1.45868	1.20114	0.789042	0.324204	1.07349	0.552133	-3.00115	-0.852807	1.11322
c051	control	f	28	15	n	y	n/a	n/a	n/a	0	average	1.0452	-0.164162	-0.386509	0.462905	0.752776	-0.593859	0.588189	-0.747035	-0.409038	0.696847	0.380608	-2.53385	-0.174457	0.447446	0.25509	-0.334739	-0.350986	0.314522	1.1093	1.56385
c052	control	m	61	9	n	n	n/a	n/a	n/a	1	average	-0.608036	-1.37021	1.06621	0.63275	-0.559572	-0.422006	0.314252	-1.14709	-0.0953613	-0.718752	-0.201832	-0.880965	1.1125	0.0286462	-1.03255	-0.304654	-0.331179	0.86662	-0.430865	1.36796
c053	control	f	59	12	n	n	n/a	n/a	n/a	1	good	-0.43711	0.224852	-0.0879537	0.479217	-0.567273	-1.56871	-2.12725	-0.873297	0.203618		0.861423	-2.0165	-0.421547	0.792245	0.400768	0.159745	-0.513932	-0.751142	0.813609	0.0417324
c054	control	f	57	9	n	n	n/a	n/a	n/a	0	good	-0.366829	0.224852	-0.980832	0.479217	-1.07562		-0.397277	-0.192676	-0.339234		-0.148658	0.155318	1.03539	0.438627	0.400768	0.775757	-0.297009	-1.62052	-1.04105	-0.179141
c055	control	f	30	12	y	y	n/a	n/a	n/a	0	average	0.138938	0.530232	0.0709758	0.578672	-0.89495	-0.593859	-1.68156	-1.39333	1.55681	-0.926102	1.00554	-0.48811	0.154069	0.789042	0.324204	0.680594	0.708808	0.0920985	-0.0978586	0.211965
c056	control	m	53	12	y	y	n/a	n/a	n/a	0	average	-0.296549	1.08537	0.577941	0.479217	0.957776	-0.744806	-2.12725	-0.873297	-0.339234	-1.11298	0.861423	-2.0165	0.693745	1.43467	0.400768	0.937419	-0.727243	1.19165	1.08686	0.0417324
c057	control	m	68	12	y	y	n/a	n/a	n/a	0	average	-0.329832	1.29381	-1.19269	0.63275	0.580852	1.2165	0.933234	0.598973		0.426538	0.805552	1.5163	-0.240717	-0.960297	0.552105	0.157833		-0.423317	-0.0850135	-0.982662
c058	control	f	57	9	y	y	n/a	n/a	n/a	1	above average	1.24963	1.08537	0.350957	0.479217	-0.0589238	0.0790934	0.756037	-0.873297	-0.882086	-0.497299	-0.148658	-1.48903	-1.19519	-0.227984	0.400768	-0.779591	-0.00354476	-0.909625	-0.0688432	-0.179141
c059	control	f	59	12	n	n	n/a	n/a	n/a	0	good	0.968506	-0.942695	-0.753848	-1.98806	-0.567273	0.0790934	0.17938	-0.192676	-1.42494	-1.11298	0.861423	1.23145	-1.53684	-1.20759	0.400768	-1.00677	0.163284	-1.14314	0.454924	-0.620888
c060	control	f	61	12	y	y	n/a	n/a	n/a	1	above average	2.0349	-1.08793	-2.39017							-0.718752	-0.694205	1.5163	-0.240717	1.70716	0.552105	1.13785	-0.59781	-0.068763	-0.742643	0.192648
c061	control	f	68	9	n	n	n/a	n/a	n/a	0	average	-0.608036	-0.179337	-0.530433	-0.969556	-1.7	-1.24126	-0.923712	0.0169529	0.500117	0.999183	0.805552	-0.880965	-0.959281	0.701613	0.552105	0.348688	-0.849094	-0.279974	2.09409	-0.982662
c062	control	f	66	8	n	n	n/a	n/a	n/a	0	average	0.0874729	-0.179337	0.754746	0.63275	-1.7	0.397245	-0.30473	0.598973	-0.0953613	0.426538	-0.0377072	1.5163	0.182384	0.806938	0.552105	1.17454	0.59782	-0.279974	2.28183	-0.395007
c063	control	m	65	9	n	y	n/a	n/a	n/a	0	average	-0.260281	0.698373	-0.131273	0.63275	-1.7	0.397245	-0.30473	-0.565067	0.500117	0.426538	-0.201832	0.568022	0.0766084	0.701613	0.552105	0.675358	-0.714708	0.175778	1.25397	-0.982662
c064	control	m	68	12	y	y	n/a	n/a	n/a	0	good	-1.09489	0.102938	-1.19269	-0.724968	0.580852	-1.24126	-0.923712	-0.565067	1.0956	-3.00933	0.805552	-1.34576	0.795172	0.385636	0.552105	0.484504	-0.280204	1.47723	0.948343	-0.688835
c065	control	f	51	12	n	n	n/a	n/a	n/a	0	above average	-1.13992	0.224852	0.577941	0.479217	-0.0589238	0.902993	0.756037	-2.91516	-1.96779	-2.34434	-0.642349	-2.0165	0.693745	0.792245	0.400768	0.159745	0.243188	0.516553	-0.910621	0.262606
c066	control	f	52	8	y	n	n/a	n/a	n/a	0	good	-1.5616	-0.358922	-0.834528	-1.24176	1.46613	-1.56871	-2.70391	1.16857	-0.339234	1.34974	0.0159062	0.331141	0.0339854	1.20957	0.400768	0.592257	-1.22589	0.750071	-0.503234	-0.179141
c067	control	m	70	12	y	n	n/a	n/a	n/a	0	good	1.19728	-0.120352	-0.236323	0.542983	0.6852	1.1769	-0.00999345	-0.214526	0.895998	0.111823	0.698141	-0.326031	-0.536168	-1.50797	-1.27154	-1.0778	-0.617819	-0.490326	-0.347968	-0.716512
c068	control	f	63	9	n	y	n/a	n/a	n/a	1	average	0.365676	0.102938	-1.32875	-0.969556	1.72128	-1.24126	-0.923712	-0.565067	-1.28632	0.999183	0.805552	-0.880965	-0.959281	1.37458	0.552105	0.348688	-1.14308	0.474181	-0.404272	1.66179
c069	control	m	60	12	n	n	n/a	n/a	n/a	1	above average	-1.44265	1.01153	-1.19269																	0.486476
c070	control	m	66	9	y	n	n/a	n/a	n/a	0	above average	-1.09489	-0.179337	-0.131273	-4.06606	0.0106401	-1.24126	-2.78066	-0.565067	-0.0953613	1.57183	-0.201832	-0.880965	-1.99517	-1.31729	-1.03255	-1.93801	-2.72553	0.685392	0.220944	-0.395007
c071	control	f	59	12	n	n	n/a	n/a	n/a	0	average	-1.2102	0.224852	-0.0879537	-1.98806	-0.0589238	0.902993	0.17938	-0.192676	1.28932	1.34974	0.861423	-0.37215	0.693745	-0.540976	0.400768	-0.229092	0.50022	-0.247254	1.9621	0.925226
c072	control	f	65	9	n	n	n/a	n/a	n/a	1	average	-1.16444	-0.179337	-0.530433	-0.969556	1.72128	1.2165	-0.923712	1.18099	-0.0953613	-2.43669	-3.27742	-0.880965	-1.99517	0.0286462	0.552105	-1.61134		0.175778	0.243227	2.54327
c073	control	m	65	12	n	y	n/a	n/a	n/a	1	average	0.017922	0.102938	0.403949	0.63275	-0.559572	-0.422006	-1.54269	-1.14709	-1.28632	1.57183	0.805552	0.103222	0.795172	-0.960297	0.552105	0.157833	1.06373	-0.788763	-0.409272	0.486476
c074	control	m	69	16	y	y	n/a	n/a	n/a	2	average	2.73041	0.102938	-0.346009	-0.882587	0.0106401	-0.422006	0.314252	0.0169529	-0.0953613	0.426538	0.187094	-0.516511	-0.663818	0.6373	0.504455	0.121141	-1.04126	-0.855093	-0.411843	0.192648
c075	control	m	64	12	y	n	n/a	n/a	n/a	2	poor	-0.816688	-1.37021	-4.38597																	1.07413
c076	control	f	64	9	n	n	n/a	n/a	n/a	0	above average	-0.95579	1.01153	-1.72791	0.63275	0.0106401	-0.422006	0.933234	0.0169529	1.69107	0.426538	-1.73963	-0.880965	-0.959281	-0.64432	0.552105	-1.28467	0.0585713	-0.466281	-0.840182	-0.688835
c077	control	f	50	9	n	n	n/a	n/a	n/a	1	above average	1.88216	0.224852	-0.980832	-4.2989	-0.0589238	-1.56871	0.756037	1.16857	1.28932		-1.69057	0.155318	-0.0798978	-2.22782	0.400768	-1.9461		-1.31367	-0.92907	1.1461
c078	control	f	63	11	n	n	n/a	n/a	n/a	1	average	0.0874729	-2.56108	-0.306672	0.63275	0.580852	-0.422006	0.314252	-1.72911	-0.0953613	-0.718752	-0.53008	-1.19083	-0.134942	1.70716	-1.05784	0.330342	0.558601	-0.932101	-0.645357	1.66179
c079	control	f	61	9	n	n	n/a	n/a	n/a	1	above average	-0.816688	-0.774773	1.06621	-0.969556	-1.12978	0.397245	0.314252	0.598973	-0.0953613	-0.146107	-1.73963	-0.880965	-1.99517	1.37458	-1.03255	-0.631324	2.91137	-0.279974	0.498051	0.192648
c080	control	f	61	12	y	n	n/a	n/a	n/a	0	above average	1.20029	1.60697	0.403949	0.63275	-0.559572	-1.24126	0.314252	-0.565067	-0.0953613	0.999183	0.805552	1.5163	-0.240717	-0.287331	-1.07048	-0.168838	-0.577063	-2.46821	-1.79706	-0.982662
c081	control	f	64	6	y	y	n/a	n/a	n/a	2	above average	1.13074	-1.68337	0.530985	0.63275	-1.12978	1.2165	0.933234	-0.565067	-0.0953613	2.14447	-1.24725	-0.416165	-0.641955	-2.34724	-0.994614	-2.07382				-0.395007
c082	control	m	70	9	y	y	n/a	n/a	n/a	1	average	-0.550908	0.57864	-0.376754	0.542983	-1.40078	-0.550578	-1.74798	-0.214526	0.379926	-1.07977	0.698141	-1.47203	-0.148873	1.31992	0.565473	0.576241	-0.917565	0.997026	1.58455	0.591327
c083	control	f	70	3	n	n	n/a	n/a	n/a	1	average	-0.463499	1.77642	0.578315	0.542983	-0.705452	-1.41431	1.14867	-1.09081	-0.136146	0.70762	0.67223	-0.389592	1.96251	-0.616752	-1.1427	0.637032	-0.0950249	-1.06592	-0.672168	1.89917
c084	control	m	68	12	n	n	n/a	n/a	n/a	1	average	0.64388	0.416098		0.63275	-1.7	0.397245	-0.30473	0.0169529	-0.0953613	-0.146107	0.805552	0.103222	0.795172	0.385636	0.552105	0.811174	-0.0804751	0.474181	2.48998	-0.982662
c085	control	m	30	15	y	n	n/a	n/a	n/a	0	above average	0.348077	1.58983	1.00164	0.578672	-0.345708	-1.35304	0.588189	-0.747035	-0.409038	0.696847	-1.73463	-1.12846	0.897993	-0.280086	0.25509	-0.334739	-0.359861	-0.575022	-1.3073	-0.463977
c086	control	m	27	9	y	y	n/a	n/a	n/a	0	average	-0.697615	1.22463	1.42378	-0.736797		0.924502	-1.68156	1.19186	-0.409038	-0.926102	-2.49535	1.45868	1.20114	-0.324424	0.324204	0.124351	-0.690383	-0.833488	0.391472	-0.0133492
c087	control	m	31	15	n	y	n/a	n/a	n/a	0	average	0.836066	0.530232	0.307565	0.462905	-0.345708	-1.35304	0.588189	-0.747035	-0.409038	0.155864	-1.73463	-1.12846	-1.24691	-1.00762	0.25509	-1.90632	-0.487487	1.06393	1.94805	-0.0133492
c088	control	m	36	15	y	y	n/a	n/a	n/a	1	below average	1.0452	-0.858556	-0.386509	-0.987716	-0.89495	-0.593859	-1.68156	-2.03963	0.246246	-0.385119	0.380608	0.867801	0.897993	1.17498	-2.95441	0.843943	-1.08911	-1.26864	-0.51749	1.33854
c089	control	f	50	8	n	n	n/a	n/a	n/a	0	good	2.51468	0.808626	1.20993	0.479217	0.957776	0.902993	0.756037	-1.55392	-0.339234	1.34974	0.0159062	0.331141	1.78264	1.20957	0.400768	1.75877	0.093178	-0.751142	-0.698739	-0.400014
c090	control	f	47	5	n	n	n/a	n/a	n/a	0	average	0.0645643	0.0387889	0.909313	-1.44327	0.432019	-1.71684	-0.757742	1.65094	1.02512	0.0877765	-2.63216	0.711778	-0.115763	-0.646152	0.360862	-0.756653	-1.02299	1.07231	0.534776	-0.570937
c091	control	f	54	9	n	y	n/a	n/a	n/a	0	above average	1.67131	-0.665948	0.350957	0.479217	1.46613	0.902993	0.756037	1.16857	1.28932	-1.11298	-1.69057	0.155318	1.03539	0.438627	0.400768	0.38692	-0.0825159	1.19165	0.0897913	-0.841761
c092	control	f	62	9	n	n	n/a	n/a	n/a	0	good	-0.677587	0.416098	0.667047	0.63275	0.580852	1.2165	0.933234	1.18099	1.69107	0.426538	-1.73963	0.568022	-0.959281	0.0286462	0.552105	-0.304654	-1.40115	1.47723	2.58526	-0.982662
c093	control	f	57	2	n	n	n/a	n/a	n/a	0	poor	-0.999357	-2.69402	0.709188	0.479217	-1.58397	0.902993	0.17938	0.487946	1.28932	-0.497299	-2.08054	-0.258274	-0.398008	0.502332	0.400768	-0.508741	-0.767826	1.19165	0.330069	-0.620888
c094	control	f	54	5	n	n	n/a	n/a	n/a	0	average	-1.13992	-0.358922	0.936172	0.479217	-1.58397	0.902993	0.756037	-1.55392	-0.882086	0.734062	-2.57423	-0.785742	-0.739658	-0.477271	0.400768	-1.12475	1.32425	0.0826653	-0.156564	-0.620888
c095	control	m	56	8	n	y	n/a	n/a	n/a	0	average	-0.0154253	1.08537	1.16316	0.479217	-1.58397	0.0790934	0.756037	-0.873297	-1.96779	0.118382	0.0159062	1.23145	1.14928	1.20957	0.400768	1.75877	1.02057	0.516553	-0.325836	-0.841761
c096	control	m	26	9	y	y	n/a	n/a	n/a	0	above average	1.11492	1.22463	1.22254	0.578672						0.696847	1.00554	0.152243	1.20114	1.49018	0.324204	1.81119	0.425188	1.06393	3.66476	-0.914606
c097	control	f	46	15	n	n	n/a	n/a	n/a	0	average	-1.79426	0.675158	0.754836	0.510273	-0.0910975	-1.05258	0.836475	-0.0666977	1.59553	-1.23042	0.393917	0.584864	1.00982	0.32702	0.277954	0.83186	-0.759632	0.0657559	-0.109038	-0.291097
c098	control	m	47	12	y	n	n/a	n/a	n/a	0	average	-1.92703	-1.23395	-1.07982	0.669824	-1.13733	0.275943	-0.226336	-1.21179	-1.25656	0.0877765	0.856495	1.12731	0.212205	0.645461	0.360862	1.0814	0.635526	0.413923	1.22932	1.1081
c099	control	m	56	10	y	y	n/a	n/a	n/a	0	average	-2.05357	1.08537	0.870548	-1.35477	1.46613	0.902993	0.756037	-0.192676	0.74647	-0.497299	0.861423	-1.66486	-0.193781	-1.66554	0.400768	-0.984929	-0.818776	1.19165	0.548702	-0.620888
c100	control	f	41	15	n	n	n/a	n/a	n/a	0	average	0.0645643	1.31153	0.754836	0.510273	-0.0910975	-1.05258	0.836475	-0.639243	-0.11572	0.0877765	0.393917	-1.24775	-0.140032	-0.351193	0.277954	-0.449477	-1.2241	-1.47718	-1.35636	-0.850777
c101	control	f	34	16	n	n	n/a	n/a	n/a	0	average	-0.349051	0.895438	0.15507	0.421085	1.30202	0.924502	0.588189	0.545562	1.55681	0.155864	0.154854	-1.34191	0.788484	-0.393952	0.230123	-0.149325	0.453977	1.06393	-0.967928	-0.0133492
c102	control	f	64	9	n	n	n/a	n/a	n/a	0	average	0.922083	-1.96564	-0.530433	-2.69921	1.72128	1.2165	0.933234	1.18099	1.69107	0.999183	-1.73963	-0.880965	0.0766084	-1.31729	-1.03255	-1.61134		-1.64713	-0.58825	-0.982662
c103	control	f	58	12	n	n	n/a	n/a	n/a	0	average	0.125136	0.808626	0.577941	0.479217	-0.0589238	-1.56871	-0.973934	1.16857	-0.339234	-1.11298	-0.642349	-0.37215	0.693745	0.792245	0.400768	0.548582	-0.92044	-1.89421	-1.16138	-0.179141
c104	control	m	39	16	n	n	n/a	n/a	n/a	0	below average	-1.32503	0.895438	0.849144	-1.41457	-0.89495	-2.11222	-3.19473	-1.39333	-1.06432	0.696847	0.154854	0.65435	0.788484	1.06111	0.230123	1.02936	-0.578339	1.06393	0.459774	0.211965
c105	control	m	25	16	n	n	n/a	n/a	n/a	0	average	1.72839	0.895438	0.15507	-1.41457	0.203534	0.165321	0.588189	-0.747035	-0.409038	-0.385119	0.154854	0.65435	0.788484	-0.393952	0.230123	0.243569	-0.514907	0.314522	-0.909659	0.662593
c106	control	f	42	15	n	n	n/a	n/a	n/a	0	average	-0.532915	-0.59758	-0.0289142	0.510273	0.955135	0.940206	0.836475	1.65094	-0.11572	0.0877765	0.393917	-2.53792	1.00982	-1.02941	0.277954	-0.876589	-0.385046	1.07231	1.42333	-0.850777
c107	control	f	33	15	y	n	n/a	n/a	n/a	0	above average	-0.0701999	0.895438	1.00164	0.578672	0.203534	0.924502	0.588189	1.19186	1.55681	-1.46709	0.380608	0.867801	0.897993	0.447446	0.25509	0.843943	0.0502512	-1.45793	-0.982142	-0.914606
c108	control	f	42	16	n	n	n/a	n/a	n/a	0	average	-0.267369	0.675158	0.582638	-2.07727	0.432019	0.940206	-0.757742	-0.0666977	-1.82697	2.06507	-1.33889	-1.4437	0.89241	0.220873	0.248005	-0.247914	-1.28211	1.07231	0.35317	-0.850777
c109	control	f	39	16	n	n	n/a	n/a	n/a	0	average	-0.00048718	-1.88214	0.849144	0.421085	0.752776	0.165321	0.588189	-0.100736	0.90153	-1.46709	0.154854	0.65435	0.788484	1.06111	0.230123	1.02936	0.306047	-0.167124	-0.79961	0.662593
c110	control	m	57	15	n	y	n/a	n/a	n/a	0	average	-0.155987	-0.665948	0.804924	0.322791	0.449426	0.0790934	0.17938	-0.192676	0.203618	0.734062	0.405873	0.744733	0.352096	0.479252	0.334468	0.710244	0.129302	-0.247254	0.571243	-0.400014
c111	control	f	32	16	n	n	n/a	n/a	n/a	0	above average	-0.0701999	0.895438	0.15507	0.421085	1.30202	0.924502	0.588189	1.19186	-0.409038	0.696847	0.154854	0.65435	0.788484	0.33358	0.230123	0.636463	-1.36529	-0.834244	-0.741342	-0.689292
c112	control	f	36	16	n	n	n/a	n/a	n/a	0	average	-0.558189	-1.18774	0.15507	0.421085	-0.345708	-0.593859	0.588189	-0.747035	-0.409038	-0.385119	0.154854	0.65435	-0.283965	0.33358	0.230123	0.243569	-0.365692	0.314522	-0.66973	-0.0133492
c113	control	f	50	14	n	n	n/a	n/a	n/a	0	below average	-0.858795	0.224852	0.951228	0.379298	-1.07562				1.28932	1.34974	0.570437	0.920555	1.58127	-0.0830276	0.358418	0.915581	1.45174	-0.247254	-1.09671	-0.620888
c114	control	f	41	15	n	n	n/a	n/a	n/a	0	good	-1.19678	0.675158	0.754836	0.510273	-0.0910975	0.275943	-0.757742	-0.0666977	1.02512	-0.571322	0.393917	-1.24775	1.00982	-1.02941	0.277954	-0.449477	-0.386618	-0.581154	-1.26288	0.828264
c115	control	f	45	15	n	n	n/a	n/a	n/a	0	average	-0.400142	-1.23395	-0.812664	0.510273	1.47825	0.940206	-0.757742	-1.78433	-1.82697	-0.571322	0.393917	0.584864	1.00982	-0.351193	0.277954	0.404748	1.07344	0.0657559	-0.654122	0.828264
c116	control	f	30	15	n	n	n/a	n/a	n/a	0	average	0.626928	0.895438	1.00164	0.462905	0.203534	0.165321	0.588189	0.545562	0.90153	-0.385119	0.380608	-1.12846	-0.174457	1.17498	0.25509	0.451049	0.0387694	0.314522	-1.50263	-0.0133492
c117	control	f	39	16	n	n	n/a	n/a	n/a	0	above average	-0.418764	0.895438	0.849144	0.421085	1.30202	0.924502	0.588189	-2.68593	-0.409038	1.77881	0.154854	0.65435	-0.283965	0.33358	0.230123	0.243569	-0.812039	-1.71716	-0.748809	0.211965
c118	control	m	58	15	n	n	n/a	n/a	n/a	0	average	-1.35076	-0.942695	-1.19276	-2.15758	0.449426	0.0790934	-0.397277	0.487946	0.203618	0.734062	0.405873	0.744733	0.352096	-1.52058	0.334468	-0.456267	0.0695106	1.19165	2.10798	-0.841761
c119	control	f	49	11	y	n	n/a	n/a	n/a	0	average	-0.732075	1.9479	1.23152	-1.25843	-0.0910975	0.940206	-0.757742	-0.0666977	-0.11572		-0.503373	1.12731	-0.820237	1.29907	0.360862	0.879835	-0.269591	1.07231	-0.215933	0.268584
c120	control	f	55	14	n	n	n/a	n/a	n/a	0	good	-0.296549	-0.358922	0.285334	0.379298	1.46613	0.0790934	0.756037	-0.873297	0.74647	0.118382	0.570437	-0.723796	-1.76461	-0.0830276	0.358418	-0.639767	0.0663174	-0.518305	0.463705	-0.620888
c121	control	m	41	12	y	y	n/a	n/a	n/a	0	average	-0.599302	-0.2959	-1.07982	0.669824	1.47825	0.940206	0.836475	-0.0666977	-0.11572	1.40597	0.856495	-0.659891	-0.937649	-0.710966	0.360862	-0.627052	-0.0332039	0.413923	-0.28424	-0.850777
c122	control	m	41	16	n	n	n/a	n/a	n/a	0	above average	1.06036	0.0387889	-0.201112	0.452637	0.432019	0.940206	-0.757742	0.505848	1.59553	-1.23042	0.226814	0.388912	-0.257444	0.899087	0.248005	0.60631	-0.441956	1.07231	-1.14977	-0.850777
c123	control	m	43	9	n	n	n/a	n/a	n/a	0	above average	2.18894	0.0387889	1.00427	0.669824	-0.0910975	0.940206	-0.757742	-0.0666977	-0.11572	0.746875	0.856495	-0.0720325	0.564442	1.29907	0.360862	1.75805	1.47981	0.0657559	-0.686108	-0.570937
c124	control	f	27	9	y	y	n/a	n/a	n/a	0	average	-0.83704	-0.858556	1.22254	-0.736797	-0.345708	-1.35304	0.588189	-0.747035	-0.409038	0.696847	1.00554	0.152243	-0.589855	-2.50702	0.324204	-1.05433	0.293507	0.573745	0.802612	-0.463977
c125	control	f	56	19	n	n	n/a	n/a	n/a	0	average	0.968506	1.3924	0.21971	0.0967602	-0.0589238	-1.56871	0.756037	-0.873297	-0.339234	-1.72866	-0.252383	0.0414415	-0.103437	-0.604682	0.238667	-0.499942	-2.21304	0.516553	-1.16836	0.483479
c126	control	f	41	12	n	n	n/a	n/a	n/a	0	good	2.05616	0.0387889	-1.07982	0.669824	1.47825	0.940206	0.836475	1.65094	-0.11572	0.0877765	-0.670476	-0.659891	0.212205	-2.06739	0.360862	-1.90839	0.474124	-1.47718	-0.0745149	-0.850777
c127	control	f	71	11	n	n	n/a	n/a	n/a	0	above average	-0.638317	-0.120352	0.678146	0.542983	-0.0101257	1.1769	-0.589324	-0.214526	-1.68436	0.111823	0.698141	-0.145624	-1.67137	1.6326	0.565473	0.555978	2.93404	-1.06592	-0.807809	-0.716512
c128	control	f	53	13	n	n	n/a	n/a	n/a	0	above average	-0.0857061	-1.52647	-0.234257	0.435806	1.46613	0.902993	0.756037	1.16857	-0.339234	0.118382	0.735001	1.09638	0.579862	0.0213032	0.382368	0.732082	0.741745	0.0826653	-0.789821	-0.841761
c129	control	f	41	12	n	n	n/a	n/a	n/a	0	average	0.0645643	1.9479	1.23152	0.669824	-0.614214	-0.388319	-0.226336	0.505848	0.454698	0.0877765	0.856495	-0.659891	0.212205	0.645461	0.360862	0.654285	-1.30041	-0.581154	-0.154842	-0.850777
c130	control	f	44	8	n	y	n/a	n/a	n/a	0	average	-0.931235	-0.2959	0.392719	0.669824	-0.0910975	0.940206	0.836475	-0.0666977	-0.11572	1.40597	-1.56777	1.12731	-0.468	-1.64281	0.360862	-1.00619		1.07231	2.36727	3.90651
c131	control	m	65	12	y	n	n/a	n/a	n/a	0	average	-0.190731	-0.179337	0.00478847	0.63275	0.580852	0.397245	0.314252	1.18099	0.500117	-0.146107	0.805552	0.103222	-0.240717	1.70716	0.552105	1.13785	2.03743	-0.855093	-0.234122	1.07413
c132	control	f	41	16	n	n	n/a	n/a	n/a	0	average	0.0645643	1.31153	0.582638	-2.07727	1.47825	-1.05258	0.836475	-0.0666977	-0.11572	0.746875	0.226814	0.388912	0.89241	0.220873	0.248005	0.60631	-0.92379	0.0657559	0.797244	-0.850777
c133	control	m	53	11	y	n	n/a	n/a	n/a	0	average	1.46047	-2.69402	-1.93933	-3.89165	0.957776	-0.744806	0.756037	-1.55392	-0.339234	0.118382	0.861423	-0.196328	1.78264	-0.436645	0.400768	0.753919	-0.653709	0.750071	2.42551	-0.179141
c134	control	f	54	9	n	n	n/a	n/a	n/a	0	average	-0.0154253										0.861423	1.23145	1.03539	-1.5612	-2.60065	-0.779591				0.262606
c135	control	f	50	8	n	n	n/a	n/a	n/a	0	average	1.53075																			4.68007
c136	control	f	30	15	n	n	n/a	n/a	n/a	0	average	0.487502	0.895438	-0.386509	0.462905	1.30202	0.924502	0.588189	1.19186	-0.409038	0.155864	0.380608	0.867801	-0.174457	0.447446	0.25509	0.451049	-1.23481	1.06393	0.340666	0.211965
c137	control	m	26	15	y	n	n/a	n/a	n/a	0	above average	0.905779	1.58983	0.307565	0.578672	1.30202	0.924502	0.588189	1.19186	1.55681	1.77881	0.380608	0.867801	-0.174457	0.447446	0.25509	0.451049	-0.288556	1.06393	-0.382713	0.437279
c138	control	f	54	9	n	n	n/a	n/a	n/a	0	good	1.46047	-0.942695	0.350957	0.479217	-0.0589238	0.902993	-0.397277	-0.873297	0.74647	-1.11298	-0.148658	0.155318	-1.19519	-0.894594	0.400768	-1.16843	0.550968	-1.47214	-0.45123	0.0417324
c139	control	f	41	15	n	n	n/a	n/a	n/a	0	average	-0.599302	-1.23395	-0.0289142	0.510273	-0.0910975	0.275943	0.836475	0.505848	1.02512	0.0877765	0.393917	0.584864	1.00982	-0.351193	0.277954	0.404748	-0.318134	0.0657559	1.23769	1.66778
c140	control	m	76	15	n	n	n/a	n/a	n/a	2	average	-1.86205	-0.120352	-0.919846	0.356187	-0.0101257	0.313159	-1.74798	-0.214526	0.379926	-1.07977	0.178108	-0.867251	-0.923463	-1.17234	-1.31449	-1.2886		-0.359283	0.710825	1.89917
c141	control	m	34	13	n	n	n/a	n/a	n/a	0	below average	-1.32503	-0.49335	-1.46967	0.546545	-1.99343	-1.35304	0.588189	-0.100736	-1.71961	1.77881	0.832114	-0.701561	-1.02789	0.675177	0.305024	0.0802202	-0.0382398	-3.02171	-1.32011	-0.463977
c142	control	f	67	12	n	n	n/a	n/a	n/a	1	good	-0.12118	1.01153	0.803109	0.63275	0.0106401	0.397245	-0.923712	0.0169529	-1.28632	-0.146107	0.805552	0.103222	-0.240717	1.0586	0.552105	0.811174	0.880267	0.474181	0.283296	-0.395007
c143	control	m	33	12	y	y	n/a	n/a	n/a	0	average	-1.95244	-0.164162	0.76505	-0.862256	-1.44419	-1.35304	-1.68156	-0.747035	-1.71961	1.23783	-1.05737	-0.48811	-0.918381	-0.666021	0.324204	-0.890982	0.473246	-0.833488	-1.08487	0.887907
c144	control	m	74	12	y	y	n/a	n/a	n/a	0	above average	0.760231	0.104447	0.175654	-1.78204	1.38053	-1.41431	-0.589324	-0.214526	1.41207	1.89921	-1.01849	-0.326031	0.728133	-0.242561	0.565473	-0.356179		-0.659132	0.41167	-0.389552
c145	control	f	55	9	n	n	n/a	n/a	n/a	1	average	0.898225	0.808626	-1.64673	0.479217	0.957776	-2.3926	-2.70391	-0.873297	-0.339234	0.734062	0.861423	0.155318	-1.19519	1.10524	0.400768	0.775757	-0.276084	0.516553	-1.1015	-0.620888
c146	control	f	38	12	y	y	n/a	n/a	n/a	0	good	-0.139913	1.22463	0.76505	0.578672	-0.345708	-1.35304	0.588189	1.19186	-0.409038	1.23783	1.00554	-0.48811	0.154069	0.789042	0.324204	0.680594	-0.0580029	0.0920985	-1.37817	-0.0133492
c147	control	m	55	12	y	y	n/a	n/a	n/a	0	average	-0.577672	-1.24972	0.577941	0.479217	-0.0589238	-1.56871	-0.973934	1.16857	-1.96779	-0.497299	0.861423	-2.0165	0.693745	-1.8742	0.400768	-1.00677	-0.208519	0.316184	-0.756798	-0.620888
c148	control	m	55	9	y	y	n/a	n/a	n/a	0	good	-0.155987	-1.8335	-0.980832	-1.29826	-0.0589238	-1.56871	0.756037	-0.873297	-0.339234	1.34974	-0.148658	0.155318	1.78264	-2.22782	0.400768	-0.779591	-0.264776	0.750071	0.670733	1.1461
c149	control	m	71	9	y	n	n/a	n/a	n/a	1	average	-1.425	-0.120352	-0.376754	0.542983	-0.0101257	1.1769	1.14867	-0.214526	-1.68436	-1.67556	0.698141	1.31938	1.96251	1.6326	0.565473	2.12533	-0.14388	0.356883	-0.509705	-0.389552
c150	control	f	69	4	n	n	n/a	n/a	n/a	0	above average	-0.0516288	1.01153	1.10554	0.63275	0.0106401	-0.422006	0.314252	0.598973	1.0956	-0.146107	0.805552	-0.106298	0.605485	-1.46362	0.552105	-0.422123		-1.19324	-0.699585	0.486476
c151	control	f	64	12	n	n	n/a	n/a	n/a	1	average	1.96535	0.416098	-0.394372	0.63275	1.72128	-1.24126	0.933234	-0.565067	-1.28632	-0.146107	0.805552	1.5163	-0.240717	0.385636	0.552105	0.484504	-1.02073	-0.788763	1.42472	0.486476
c152	control	m	68	9	y	n	n/a	n/a	n/a	1	average	-0.329832	1.60697	-0.131273	0.63275	0.0106401	-1.24126	-0.923712	-0.565067	-0.0953613	-0.718752	0.805552	-0.880965	0.0766084	0.0286462	0.552105	0.348688	-0.241207	0.386989	-0.931065	0.486476
c153	control	f	51	12	n	n	n/a	n/a	n/a	1	below average	-0.296549	-0.942695	0.577941	0.479217	0.957776	-0.744806	0.17938	-0.192676	0.203618	-1.11298	-0.642349	-0.37215	-1.53684	0.125634	0.400768	-0.617929	1.4736	-2.02182	-1.10259	1.1461
c154	control	m	29	15	n	n	n/a	n/a	n/a	0	average	1.60291	0.201044	-0.386509	0.462905	0.203534	0.165321	0.588189	1.19186	0.246246	1.23783	0.380608	0.867801	-0.174457	0.447446	0.25509	0.451049	-0.887344	1.06393	-0.723959	-0.914606
c155	control	f	53	7	n	n	n/a	n/a	n/a	0	average	-1.49132	0.224852	-1.35412	-1.70552	1.46613	0.902993	0.756037	1.16857	-1.96779	0.118382	0.18047	-1.13739	0.147869	-0.685932	-2.55275	-0.757754	-1.28295	1.19165	0.364717	2.02959
c156	control	f	33	11	y	y	n/a	n/a	n/a	0	above average	-1.39474	-2.24735	-0.470604	0.578672	0.752776	0.924502	0.588189	1.19186	0.246246	0.155864	-0.83162	-2.27092	-1.88132	1.49018	0.324204	-0.290608	-0.636382	1.06393	0.505516	0.437279
c157	control	m	30	15	y	y	n/a	n/a	n/a	0	good	-0.627902	1.22463	0.307565	0.578672	-0.89495	-1.35304	-1.68156	-0.747035	0.246246	-0.385119	-1.73463	-1.12846	-0.174457	-1.00762	0.25509	-1.51342	-1.33667	1.06393	0.469158	-0.914606
c158	control	f	67	9	n	n	n/a	n/a	n/a	1	average	-0.0516288	-1.96564	0.267887	0.63275	0.0106401	-1.24126	-0.923712	-0.565067	-0.0953613	-1.2914	-0.201832	-0.880965	-0.959281	0.701613	-1.03255	-0.631324	2.03809	-0.0693791	-1.59054	-0.982662
c159	control	f	29	10	y	y	n/a	n/a	n/a	0	good	-1.74331	-1.55295	-1.01218	0.578672	1.30202	-0.593859	0.588189	-0.747035	0.246246	-0.385119	1.00554	-0.0612077	0.373085	-0.43829	0.324204	0.309765	-0.914703	-0.274136	-1.10568	-0.0133492
c160	control	f	62	10	n	n	n/a	n/a	n/a	0	average	-0.329832	-0.179337	0.180187	0.63275	1.72128	1.2165	0.933234	1.18099	1.69107	0.999183	-1.90375	-1.0359	-1.06506	-1.42261	-1.04519	-2.43719	0.233025	-0.279974	0.0398882	2.24944
c161	control	f	61	9	y	y	n/a	n/a	n/a	3	below average	2.10445	0.102938	0.267887	0.63275	0.0106401	-0.422006	-2.78066	-1.72911	0.500117	-0.146107	0.805552	-0.880965	1.1125	0.701613	0.552105	1.00203	0.402478	-0.423317	-1.17829	1.95561
c162	control	f	59	12	n	n	n/a	n/a	n/a	0	above average	-1.5616	-0.942695	-0.753848	0.479217	0.957776	0.902993	0.756037	1.16857	1.28932	0.118382	-2.18426	-0.37215	-1.53684	-1.8742	0.400768	-2.17328	0.797753	1.19165	2.26044	-0.841761
c163	control	m	28	17	y	y	n/a	n/a	n/a	0	above average	0.557215	0.530232	0.696649	0.578672	-1.99343	-1.35304	0.588189	-2.68593	0.90153	0.696847	-0.0708992	0.440898	-0.393473	-0.507818	-3.00435	-0.749699	-0.632343	-0.274136	-1.16199	-0.238663
c164	control	f	30	16	n	n	n/a	n/a	n/a	0	good	1.0452	0.201044	0.849144	0.421085	-0.89495	-2.8714	-0.924978	-0.100736	-0.409038	-1.46709	0.154854	-1.34191	0.788484	0.33358	0.230123	0.243569	1.694	-0.533358	-0.297472	-0.914606
c165	control	f	25	16	n	n	n/a	n/a	n/a	0	average	0.905779	-0.49335	-0.539004	0.421085	1.30202	0.924502	0.588189	0.545562	1.55681	0.696847	0.154854	0.65435	0.788484	1.06111	0.230123	1.02936	-0.703517	-0.533358	-0.596649	-0.238663
c166	control	f	53	2	n	n	n/a	n/a	n/a	0	average	-0.296549	0.808626	-0.622601	-1.42298	-0.0589238	-1.56871	0.756037	-0.873297	-1.96779		-3.62245	-0.258274	0.717284	0.502332	-2.43299	-0.897578	-0.00561823	1.19165	0.0268844	2.25047
c167	control	m	35	19	n	n	n/a	n/a	n/a	0	above average	0.557215	-1.88214	0.391659	0.295625	0.752776	-0.593859	0.588189	-0.100736	-0.409038	1.77881	-0.522406	0.0139961	-0.61249	-0.735549	0.155222	-0.771764	-1.14127	1.06393	-0.596527	1.11322
c168	control	f	48	12	n	y	n/a	n/a	n/a	0	average	0.263724	0.340469	0.487679	0.669824	-0.0910975	0.940206	0.836475	-0.0666977	-0.11572	0.746875	0.856495	1.12731	-0.937649	1.29907	0.360862	1.0814	-1.08019	-0.581154	-1.84703	-0.850777
c169	control	f	57	12	n	n	n/a	n/a	n/a	0	above average	0.265698	-0.358922	1.20993	0.479217	-1.58397	-1.56871	0.756037	1.16857	-0.339234	-1.72866	0.861423	-0.37215	-0.421547	1.43467	0.400768	0.937419	-1.39008	-0.751142	-1.04482	-0.179141
c170	control	m	79	16	n	n	n/a	n/a	n/a	0	average	0.060957	0.828035	0.637546	0.288708	-2.0961	1.1769	1.14867	2.41434	-1.68436	0.70762	-0.00975017	0.639565	-1.05256	-0.00595321	0.511527	-0.0358961	0.684687	1.92956	-0.0732765	-0.716512
c171	control	m	31	16	n	n	n/a	n/a	n/a	0	average	0.417789	-1.88214	-2.62123	0.421085	0.752776	0.165321	-0.168395	-1.39333	0.90153	-0.926102	0.154854	0.65435	-0.283965	-0.393952	0.230123	-0.149325	0.225615	-0.533358	0.0275033	1.78916
c172	control	f	51	11	n	n	n/a	n/a	n/a	0	good	-0.577672	-0.942695	0.724244	0.479217	-0.0589238	0.902993	0.756037	1.16857	1.28932	0.734062	0.861423	1.23145	1.78264	-1.10326	0.400768	0.753919	-0.668964	1.19165	-0.460733	0.0417324
c173	control	f	53	14	n	n	n/a	n/a	n/a	0	above average	-1.13992	0.808626	0.951228	0.379298	1.46613	0.902993	0.756037	1.16857	1.28932	0.734062	0.570437	0.920555	-1.76461	0.583583	0.358418	0.137907	0.155933	1.19165	0.448651	0.704353
c174	control	f	66	12	n	n	n/a	n/a	n/a	1	good	-1.6513	0.416098	0.403949	0.63275	0.0106401	1.2165	-0.923712	1.18099	-1.8818	0.426538	0.805552	0.103222	-0.240717	-0.287331	0.552105	0.157833	-0.228236	1.47723	0.912896	-0.395007
c175	control	f	54	14	n	n	n/a	n/a	n/a	0	good	0.476541	1.3924	0.285334	0.379298	-1.07562	-0.744806	0.756037	-0.192676	0.74647	1.34974	-2.51339	0.920555	-0.649314	0.583583	0.358418	-0.25093	0.744707	-0.247254	-0.462341	0.0417324
c176	control	m	71	9	n	n	n/a	n/a	n/a	0	average	0.672822	0.353842	1.27115	-2.20088	-0.0101257	0.313159	-1.16865	-0.214526	0.895998	1.30342	0.698141	0.21519	-0.148873	-0.578193	0.565473	-0.145379	-0.0281692	0.396862	-0.62046	-0.389552
c177	control	m	75	12	y	n	n/a	n/a	n/a	0	above average	0.93505	1.30223	-1.88423	0.542983	-1.40078	-0.550578	-0.00999345	-1.9671	-0.652219	0.111823	-2.77866	1.31938	-0.536168	-0.242561	0.565473	-0.716989	0.227739	-0.659132	-0.550279	-0.0625924
c178	control	f	53	12	n	n	n/a	n/a	n/a	0	above average	-0.155987	-0.358922	1.20993	0.479217	-0.0589238	-1.56871	-0.973934	1.16857	-0.339234	-1.72866	-0.642349	-0.37215	-0.421547	0.125634	0.400768	-0.229092	0.48332	0.516553	-0.595968	0.262606
c179	control	m	73	12	n	n	n/a	n/a	n/a	0	average	-0.113861	0.353842	-0.6483	-2.40332	0.6852	-0.550578	1.14867	2.41434	-0.652219	-1.67556	0.698141	1.31938	-0.536168	-1.50797	0.565473	-0.356179	-1.64735	-1.21541	-1.57573	-0.716512
c180	control	m	69	9	y	n	n/a	n/a	n/a	0	average	-0.190731	-0.774773	-2.12707	0.63275	1.72128	-0.422006	0.314252	-0.565067	-0.0953613	-0.718752	-1.73963	-0.880965	0.0766084	0.0286462	0.552105	-0.631324	-0.833879	0.386989	-0.757038	0.192648
c181	control	f	26	19	n	n	n/a	n/a	n/a	0	average	-0.767328	-1.88214	0.391659	0.295625	-0.89495	0.165321	-0.924978	0.545562	0.246246	0.696847	-0.522406	0.0139961	-0.61249	-1.46308	-6.26378	-1.95045	1.68858	-0.533358	-1.19047	4.26762
c182	control	f	31	9	y	y	n/a	n/a	n/a	0	above average	-0.279338	-0.858556	1.22254	0.578672	-0.345708	-1.35304	-1.68156	-0.747035	-0.409038	1.23783	-0.380113	0.152243	-0.589855	-0.324424	0.324204	-0.661437	0.392323	-1.26864	-0.991105	0.437279
c183	control	f	36	9	y	y	n/a	n/a	n/a	0	average	0.0692256	0.530232	-0.859688	-0.736797	0.203534	-1.35304	0.588189	-0.747035	-0.409038	0.155864	-0.380113	0.152243	0.482594	1.13064	0.324204	0.517245	-0.711323	-0.274136	0.869939	1.56385
c184	control	f	58	15	n	n	n/a	n/a	n/a	0	good	0.968506	0.808626	0.13903	0.322791	0.957776	0.0790934	-0.397277	-0.192676	-0.339234	1.96542	0.405873	0.744733	-0.763197	0.479252	0.334468	0.321407	-0.53183	-1.31367	-0.111911	-0.841761
c185	control	f	70	12	n	n	n/a	n/a	n/a	0	good	0.060957	-1.54293	0.999607	0.542983	-0.705452	0.313159	0.569337	0.661761	0.379926	0.111823	0.698141	-2.01325	0.728133	0.390144	0.565473	0.00463099	-0.254648	-0.739066	-0.843509	-0.716512
c186	control	m	62	10	y	y	n/a	n/a	n/a	0	average	0.504778	-1.68337	0.180187	0.63275	-0.559572	1.2165	-0.923712	0.598973	-0.69084	-1.2914	0.805552	-1.0359	-0.0291669	-1.42261	0.552105	-0.803833	0.738338	-1.32891	-0.926049	-0.395007
c187	control	m	67	9	n	n	n/a	n/a	n/a	1	above average	-1.23399	0.416098	1.06621	-0.969556	0.0106401	1.2165	-0.923712	1.18099	-1.8818	0.999183	0.805552	-0.880965	1.1125	-1.31729	0.552105	0.0220171	0.0241985	-1.8517	-0.523061	0.486476
c188	control	f	46	12	n	n	n/a	n/a	n/a	0	average	0.794817	0.675158	-0.296071	0.669824	1.47825	-1.05258	0.836475	-0.0666977	-0.11572	-1.88952	-2.23618	1.12731	-3.23736	1.29907	0.360862	-0.627052	-0.35282	1.07231	0.441803	2.22747
c189	control	f	63	11	n	n	n/a	n/a	n/a	0	good	-0.260281	-0.774773	0.491648	0.63275	0.0106401	1.2165	-0.923712	1.18099	-0.0953613	-1.86404	-0.53008	-1.19083	-1.17083	-0.182005	0.552105	-0.976341	-0.294181	-1.19324	-0.793132	1.95561
c190	control	f	68	9	n	n	n/a	n/a	n/a	0	good	-0.12118	-0.179337	0.667047	0.63275	1.15106	1.2165	0.933234	1.18099	1.0956	-0.718752	0.805552	0.568022	0.0766084	1.37458	0.552105	1.3287	-1.07037	0.175778	-0.62936	-0.982662
c191	control	f	50	12	n	n	n/a	n/a	n/a	0	above average	0.195417	-0.942695	0.577941	0.479217	-0.567273	-0.744806	-0.397277	0.487946	0.203618	1.34974	-0.642349	1.23145	-0.421547	1.43467	0.400768	0.937419	-0.107508	0.516553	0.845354	-0.620888
c192	control	m	18	11	y	y	n/a	n/a	n/a	0	good	-1.39474	0.530232	-1.16468	0.578672	-0.345708	0.924502	0.588189	-1.39333	0.246246	-0.385119	1.00554	-0.274659	0.263577	-0.552156	0.324204	0.102286	0.259925	-1.79856	-0.810792	0.887907
c193	control	m	60	11	n	n	n/a	n/a	n/a	0	average	1.61759	1.01153	1.18194	0.63275							-0.53008	1.5163	1.80655	-0.854971	0.552105	0.657012	0.584407	-0.279974	-0.24311	0.486476
c194	control	f	41	16	n	n	n/a	n/a	n/a	0	above average	-1.26317	0.0387889	0.582638	0.452637	0.955135	-1.05258	0.836475	1.07839	-0.11572	0.746875	0.226814	-2.53792	-1.4073	0.220873	0.248005	-1.10214	-1.12963	0.0657559	-0.494411	-0.570937
c195	control	m	70	15	n	y	n/a	n/a	n/a	0	poor	1.54691	-2.26652	-0.0958926	0.356187	-0.0101257	-1.41431	-0.589324	-0.214526	-0.136146	0.111823	0.178108	0.819972	0.340837	-0.539634	0.525843	0.154641	0.518178	0.396862	0.920847	2.22613
c196	control	f	49	12	n	n	n/a	n/a	n/a	0	above average	-0.864848	-0.59758	1.23152	0.669824	-1.66045	-1.05258	-2.35196	-1.78433	-1.82697	0.0877765	0.856495	1.12731	0.212205	-1.38918	0.360862	-0.19994	-0.104431	-2.89932	-0.550827	-0.0112564
c197	control	m	56	13	n	n	n/a	n/a	n/a	0	above average	-0.0154253	-1.52647	0.431637								0.735001	-0.547973	-0.53543	-0.645307	0.382368	-0.823266				-0.400014
c198	control	f	55	12	n	n	n/a	n/a	n/a	0	good	0.335979	0.808626	1.20993	0.479217	-0.567273	0.902993	-1.55059	1.16857	1.28932	-1.11298	-0.642349	-2.0165	0.693745	0.125634	0.400768	-0.229092	-0.76714	-1.31367	-1.35801	0.0417324
c199	control	m	58	15	n	n	n/a	n/a	n/a	0	above average	1.46047	0.224852	0.804924	0.322791	-1.07562	-0.744806	-2.70391	-0.873297	-1.42494	0.734062	-1.13604	0.744733	-0.763197	-2.18719	0.334468	-1.62278	-0.693018	0.516553	-0.212215	-0.620888
c200	control	f	66	8	n	n	n/a	n/a	n/a	0	above average	-0.608036	1.01153	1.18194	0.63275	1.72128	1.2165	0.933234	1.18099	1.69107	0.999183	0.805552	0.722955	1.21827	1.4799	0.552105	1.82788	-0.585562	-0.279974	-1.18679	-0.982662
c201	control	m	29	15	n	y	n/a	n/a	n/a	0	above average	-0.558189	0.530232	1.00164	0.462905	-0.345708	-0.593859	-0.168395	-0.100736	0.246246	-0.926102	0.380608	-1.12846	0.897993	-0.280086	0.25509	0.0581548	0.99533	-0.167124	-0.463343	-0.914606
c202	control	f	42	12	n	n	n/a	n/a	n/a	0	good	1.92339	-3.14306	-0.296071	0.669824	1.47825	-1.05258	0.836475	1.65094	-0.11572		-0.670476	-0.659891	-0.937649	-0.0327528	0.360862	-0.627052	1.93305	-1.07305	-0.645385	-0.0112564
c203	control	f	57	12	n	n	n/a	n/a	n/a	0	average	-1.2102	-1.52647	-0.753848	0.479217	-0.0589238	-1.56871	-0.973934	-0.873297	-0.339234	-0.497299	0.861423	-2.0165	-0.421547	-1.20759	0.400768	-1.3956		-2.48887	0.213111	-0.620888
c204	control	f	39	16	n	n	n/a	n/a	n/a	0	above average	1.74233	-1.18774	0.849144	0.421085	1.30202	0.165321	0.588189	-0.100736	-0.409038	1.23783	0.154854	0.65435	0.788484	-0.393952	0.230123	0.243569	1.01707	0.314522	-0.745014	-0.914606
c205	control	f	65	9	n	n	n/a	n/a	n/a	0	above average	-0.260281	0.416098	1.18194	-0.969556	0.0106401	-1.24126	0.933234	-0.565067	0.500117	0.426538	-0.201832	0.568022	1.1125	1.37458	0.552105	1.3287	0.193445	0.474181	-0.738741	-0.101179
c206	control	f	64	12	n	n	n/a	n/a	n/a	0	below average	-1.85995	-0.179337	0.403949	0.63275	0.580852	-0.422006	0.933234	1.18099	-0.69084	1.57183	-0.694205	1.5163	0.795172	-0.960297	0.552105	0.157833	0.803016	1.47723	-0.36248	0.192648
c207	control	f	45	9	n	n	n/a	n/a	n/a	0	average	-1.26317	0.0387889	0.220522	0.669824	-0.0910975	0.940206	-0.757742	-0.0666977	1.59553	0.0877765	0.856495	-0.0720325	1.33485	1.29907	0.360862	1.75805	0.758698	-0.581154	-0.515913	2.22747
c208	control	m	45	9	y	y	n/a	n/a	n/a	0	average	0.993977	0.976839	-0.563228	-1.14316	-0.614214	0.940206	0.836475	-1.21179	-0.686138	0.746875	-0.169168	-0.0720325	0.564442	0.963902	0.360862	0.903822	-0.356343	-0.232987	-1.77214	-0.291097
c209	control	f	50	15	n	n	n/a	n/a	n/a	0	above average	-0.577672	1.3924	-0.526865	0.322791	-0.0589238	0.902993	-0.973934	1.16857	1.28932	0.118382	0.405873	-0.899619	1.46739	0.479252	-2.74435	0.321407	-0.0690792	0.0826653	-0.757372	-0.620888
c210	control	f	71	6	n	n	n/a	n/a	n/a	2	good	-1.25018	-1.54293	-2.16509	0.542983	1.38053	-1.41431	-0.589324	-0.214526	0.895998	-0.483973	-1.65151	-0.930813	-1.02588	-0.28112	-3.02598	-2.09944				-0.389552
c211	control	f	58	8	n	n	n/a	n/a	n/a	0	good	1.39019	1.3924	0.497261	0.479217	-0.0589238	0.0790934	-0.973934	-0.873297	-0.339234	0.734062	0.861423	0.331141	0.0339854	1.20957	0.400768	1.36993	0.279623	0.516553	-0.972488	-0.841761
c212	control	m	67	12	n	n	n/a	n/a	n/a	0	above average	-0.468934	-0.774773	0.403949	-1.08777	0.0106401	0.397245	-0.30473	0.598973	1.0956	-0.146107	0.805552	0.103222	0.795172	-0.960297	0.552105	0.157833	-0.293002	-0.466281	-0.509989	-0.688835
c213	control	m	55	12	y	n	n/a	n/a	n/a	0	average	0.335979	0.808626	0.577941	0.479217	1.46613	-1.56871	0.756037	1.16857	-1.96779	-1.11298	0.861423	-0.37215	-0.421547	0.125634	0.400768	0.159745		-0.0137359	-0.174398	-0.400014
c214	control	m	65	9	y	n	n/a	n/a	n/a	0	above average	0.574329	1.01153	0.267887	-0.606753	0.0106401	-0.422006		-1.72911	-0.69084	-0.146107	0.805552	-0.880965	1.1125	-1.31729	0.552105	0.0220171	0.0547225	0.685392	-0.11667	-0.982662
c215	control	f	57	12	n	n	n/a	n/a	n/a	0	good	-0.718234	0.224852	1.20993	0.479217	-0.0589238	-1.56871	0.756037	-0.873297	-1.96779	-1.72866	0.861423	-0.37215	-0.421547	1.43467	0.400768	0.937419	0.900038	-0.957126	-0.150821	0.262606
c216	control	m	47	12	y	n	n/a	n/a	n/a	0	average	0.263724	0.0387889	0.487679	-1.31607		-1.05258	0.836475	-0.0666977	-0.11572	0.746875	0.856495	-0.659891	1.33485	-1.38918	-3.48224	-0.627052	-0.0914297	-0.724885	1.09567	-0.850777
c217	control	m	38	12	y	n	n/a	n/a	n/a	0	average	-0.488477	0.201044	0.76505	-0.862256	-0.345708	0.924502	0.588189	1.19186	-0.409038	1.23783	-1.05737	1.45868	-0.918381	-0.666021	0.324204	-0.498088	-0.274118	1.06393	1.8015	0.211965
c218	control	f	31	15	n	n	n/a	n/a	n/a	0	average	-1.1856	0.895438	1.00164	0.462905	-0.345708	0.924502	0.588189	0.545562	0.246246	0.155864	0.380608	0.867801	0.897993	0.447446	0.25509	0.843943	-0.913517	1.06393	2.68598	-0.0133492
c219	control	m	33	12	y	n	n/a	n/a	n/a	0	poor	2.36975	-0.49335	-0.623099	0.578672	-1.44419	0.924502	0.588189	1.19186	-0.409038	-0.385119	1.00554	1.45868	-0.918381	1.49018	0.324204	1.07349	-0.0536428	1.06393	0.551664	-0.463977
c220	control	f	34	15	n	n	n/a	n/a	n/a	0	average	-0.139913	1.58983	-1.08058	0.462905	0.752776	0.165321	0.588189	0.545562	0.246246	-1.46709	-1.73463	-1.12846	0.897993	0.447446	0.25509	0.0581548	-1.32004	-0.533358	-0.868162	0.211965
c221	control	f	48	6	n	n	n/a	n/a	n/a	0	average	1.3923	-0.59758	-0.830386	-1.50091	-0.0910975	0.940206	0.836475	1.65094	-1.82697	-1.23042	0.856495	0.515826	-0.233175	1.28234	-3.30254	0.726246	-0.131415	-0.581154	0.656682	1.1081
c222	control	f	31	9	y	y	n/a	n/a	n/a	0	above average	-0.418764	1.22463	0.528461	0.578672	1.30202	-1.35304	0.588189	-0.747035	-0.409038	-1.46709	-0.380113	0.152243	1.20114	-1.05196	0.324204	0.124351	0.021178	1.06393	-0.0995724	-0.914606
c223	control	f	70	9	n	n	n/a	n/a	n/a	0	above average	-0.550908	0.353842	1.27115	0.542983	1.38053	0.313159	0.569337	-0.214526	-0.136146	1.30342	0.698141	1.31938	-0.148873	1.31992	0.565473	1.65867				-0.716512
c224	control	f	66	9	n	n	n/a	n/a	n/a	1	average	-0.816688	1.01153	-0.530433	-0.969556	0.0106401	-1.24126	-0.923712	-1.14709	-0.0953613	0.426538	0.805552	-0.880965	1.1125	0.701613	0.552105	1.00203	2.58266	0.175778	0.83624	-0.688835
c225	control	m	59	7	n	n	n/a	n/a	n/a	0	average	0.40626	-1.52647	-0.0223301	0.479217	-0.567273	0.0790934	0.17938	-0.873297	-0.339234	-0.497299	0.18047	-1.13739	1.78264	-0.019322	0.400768	0.797594	1.06827	-1.89421	-0.00213413	1.58785
c226	control	m	45	12	y	y	n/a	n/a	n/a	0	average	0.0645643	-0.2959	-0.296071	0.669824	-0.0910975	-1.05258	0.836475	-0.0666977	-0.11572	-1.88952	-0.670476	1.12731	0.212205	-2.06739	0.360862	-1.48128		-2.77238	-0.177721	1.38794
c227	control	f	63	12	n	n	n/a	n/a	n/a	0	good	-0.886239	-0.774773	-0.394372	-1.08777	1.72128	1.2165	0.933234	-0.565067	1.69107	0.999183	-2.232	-1.34576	-2.3125	-0.960297	0.552105	-2.12886		-1.31385	-0.462099	-0.101179
c228	control	m	49	12	y	y	n/a	n/a	n/a	0	above average	0.595657	-1.56864	0.487679								0.856495	-0.659891	1.33485	0.645461	0.360862	0.654285				-0.570937
c229	control	f	59	5	n	n	n/a	n/a	n/a	0	below average	1.10907	0.224852	-2.3933	-1.5925	-0.567273	-0.744806	-0.397277	-1.55392	-1.42494	-1.11298	-2.57423	-0.785742	-1.85495	-1.14388	0.400768	-2.29126	-0.349115	-1.14314	0.797031	0.925226
c230	control	m	27	20	n	n	n/a	n/a	n/a	0	average	1.11492	-0.49335	-1.84306	0.253805	0.752776	0.165321	0.588189	-0.100736	1.55681	-2.00807	-0.748159	-0.199455	0.350451	0.605649	0.130255	0.199438	-1.52382	1.06393	3.07145	-0.689292
c231	control	f	58	10	n	n	n/a	n/a	n/a	0	good	-1.13992	0.808626	-0.461241	-1.87504	1.46613	0.902993	0.756037	1.16857	-0.339234	1.34974	-0.313222	-1.66486	-0.193781	-0.332315	-2.6246	-0.984929	-0.0818558	0.0826653	-0.421963	-0.620888
c232	control	f	60	16	n	n	n/a	n/a	n/a	0	above average	0.922083	1.01153	0.0531508	0.484263	-1.12978	0.397245	0.933234	0.0169529	0.500117	0.999183	0.187094	-0.516511	0.372071	0.6373	0.504455	0.447811	0.782614	0.474181	-1.03144	-0.395007
c233	control	f	61	15	n	y	n/a	n/a	n/a	0	above average	0.504778	0.698373	0.939171	0.523668	-1.7	-0.422006	-2.16168	-2.31113	-1.28632		0.351218	1.08741	-0.558043	-1.27627	0.5171	-0.359692	0.0708392	1.47723	1.01292	-0.395007
c234	control	m	44	18	n	y	n/a	n/a	n/a	0	average	0.52927	-0.932269	-3.68051	-2.19254	-0.614214	0.275943	0.836475	1.07839	0.454698	-1.23042	-1.67309	-0.00299383	-0.492268	0.00857959	0.188105	-0.699014				-0.850777
c235	control	m	22	12	y	y	n/a	n/a	n/a	0	average	-0.00048718	0.530232	0.76505	-0.862256	-1.99343	-0.593859	-0.168395	-0.747035	-2.37489		1.00554	-0.48811	-0.918381	0.0615106	0.324204	-0.105194	1.22432	-1.06215	-0.680421	0.211965
c236	control	m	28	12	y	y	n/a	n/a	n/a	0	below average	-1.67359	-0.858556	1.42378	-0.862256	-0.345708	-1.35304	-0.924978	-0.747035	-0.409038	-1.46709	1.00554	-0.48811	0.154069	1.49018	0.324204	1.07349	1.97057	-2.38008	-0.691684	0.211965
c237	control	m	31	16	y	n	n/a	n/a	n/a	0	average	-1.1856	-0.49335	-0.539004	-1.02954	-0.89495	0.924502	-0.924978	-0.100736	-0.409038	0.696847	0.154854	-1.34191	-0.283965	-1.12148	0.230123	-0.935113	0.601634	1.06393	1.15528	-0.463977
c238	control	f	29	9	y	y	n/a	n/a	n/a	0	above average	-0.0701999	-0.164162	0.528461	0.578672	-1.99343	0.924502	-1.68156	1.19186	-2.37489	-0.926102	-0.380113	-1.84402	0.482594	-1.77949	0.324204	-1.05433	0.0543996	1.06393	0.643484	-0.0133492
c239	control	m	30	12	y	y	n/a	n/a	n/a	0	above average	0.417789	-1.55295	-1.31717	-2.69792	-0.89495	-0.593859	-0.168395	0.545562	-2.37489	1.77881	1.00554	-0.48811	1.20114	1.49018	0.324204	1.46638	-0.503435	0.573745	-1.13347	-0.463977
c240	control	m	48	9	y	y	n/a	n/a	n/a	0	average	-0.400142	0.340469	0.220522	0.669824	-1.66045	-1.05258	-2.35196	-1.78433	-1.82697	0.0877765	-1.73487	1.12731	0.564442	0.285688	0.360862	0.476709	2.15006	1.07231	2.19462	-0.570937
c241	control	m	57	12	y	y	n/a	n/a	n/a	0	below average	0.125136	-1.24972	-0.0879537	0.479217	-0.0589238	-1.56871	-0.973934	1.16857	-0.339234	-1.72866	-0.642349	1.23145	-0.421547	-1.20759	0.400768	-0.617929	-0.342688	1.19165	1.0135	1.1461
c242	control	f	23	12	y	y	n/a	n/a	n/a	0	average	0.905779	-0.858556	-1.31717	0.578672	-0.345708	0.924502	0.588189	1.19186	-0.409038	-0.385119	-1.05737	-0.48811	0.154069	-1.39355	0.324204	-0.890982	2.42993	1.06393	0.179652	-0.914606
c243	control	f	63	8	n	n	n/a	n/a	n/a	2	average	-0.12118	-2.56108	-0.442734	-0.930151	0.0106401	-1.24126	0.933234	1.18099	-0.0953613	-1.2914	-0.0377072	-0.726031	-0.853506	-0.538995	-1.0199	-1.43883	-1.06909	-0.788763	0.258872	-0.688835
c244	control	f	29	9	y	y	n/a	n/a	n/a	0	poor	0.905779	-0.164162	-2.24784	-2.57246	1.30202	-1.35304	0.588189	1.19186	1.55681	-0.926102	-2.49535	0.152243	-3.8072	0.403108	0.324204	-2.23301	3.47027	0.0920985	0.264351	-0.689292
c245	control	m	32	11	y	y	n/a	n/a	n/a	0	above average	1.18463	1.22463	0.223471	0.578672	1.30202	0.924502	0.588189	-0.100736	0.90153	-0.926102	1.00554	1.45868	1.20114	0.175376	0.324204	1.28097	-0.323437	0.0920985	-0.278381	0.887907
c246	control	f	27	12	y	y	n/a	n/a	n/a	0	above average	-0.627902	-0.164162	1.42378	0.578672	0.752776	0.924502	0.588189	0.545562	-0.409038	-0.385119	-1.05737	-0.48811	-0.918381	-0.666021	0.324204	-0.890982	0.451515	1.06393	0.403301	-0.463977
c247	control	f	24	12	y	y	n/a	n/a	n/a	0	good	-1.04618	-1.55295	-0.623099	0.578672	-0.89495	0.165321	-0.168395	0.545562	0.246246	0.155864	1.00554	1.45868	0.154069	-1.39355	0.324204	-0.105194	1.00804	1.06393	0.103281	-0.914606
c248	control	f	30	9	y	y	n/a	n/a	n/a	0	average	-0.627902	-0.858556	-0.859688	-0.736797	-0.345708	-1.35304	-3.95131	-0.747035	-0.409038	0.155864	1.00554	-1.84402	-2.73475	-1.77949	0.324204	-1.84012	-0.759557	-1.06215	0.0707038	2.46511
c249	control	f	34	16	n	n	n/a	n/a	n/a	0	average	-0.558189	0.895438	0.849144	0.421085	-0.345708	0.924502	-1.68156	1.19186	1.55681	0.155864	0.154854	-1.34191	-0.283965	-1.84902	0.230123	-1.32801	-1.81367	-0.167124	1.10257	0.437279
c250	control	f	53	4	n	n	n/a	n/a	n/a	1	above average	-0.366829	-0.942695	0.416581	0.479217	0.449426	0.0790934	-0.397277	-0.873297	-0.339234	1.34974	-0.867752	-0.60992	-0.625775	-1.03955	0.400768	-1.30825	-1.07589	-0.518305	-0.35258	3.79658
c251	control	f	37	15	n	n	n/a	n/a	n/a	0	good	-0.83704	0.895438	-1.77466	0.462905	-0.345708	0.924502	0.588189	-0.747035	1.55681	0.155864	0.380608	-1.12846	-1.24691	-0.280086	0.25509	-0.727633	-0.54502	0.314522	0.692726	-0.0133492
c252	control	f	63	12	n	n	n/a	n/a	n/a	0	average	-0.260281	0.416098	0.403949	0.63275	0.0106401	-1.24126	0.933234	-0.565067	-0.0953613	-1.2914	-0.694205	-1.34576	-1.27661	-0.287331	0.552105	-1.14885	-0.346541	1.47723	1.18407	1.36796
c253	control	f	53	15	n	n	n/a	n/a	n/a	0	good	-1.13992	0.224852	-0.526865	0.322791	-0.0589238	-0.744806	-1.55059	-0.192676	-0.882086	-0.497299	0.405873	0.744733	-0.763197	-0.187358	0.334468	-0.456267	4.58905	0.0826653	-0.978038	0.925226
c254	control	f	34	16	n	n	n/a	n/a	n/a	0	average	-1.11589	-1.88214	0.15507	0.421085	-1.44419	0.165321	-0.168395	-1.39333	-1.06432	-1.46709	0.154854	0.65435	-0.283965	-1.84902	0.230123	-0.935113	-0.458804	1.06393	0.10086	0.437279
c255	control	f	38	9	n	n	n/a	n/a	n/a	0	average	0.69664	0.201044	-0.165613	-1.12183	-0.345708	-1.35304	0.588189	-0.747035	-0.409038	-2.00807	1.00554	0.152243	-0.589855	1.13064	0.324204	0.910139	-0.459283	1.06393	0.278481	-0.914606
c256	control	f	47	9	n	n	n/a	n/a	n/a	0	average	2.32171	0.0387889	-1.34698	0.669824	-0.0910975	0.940206	-0.757742	-0.0666977	1.59553	0.746875	0.856495	-0.0720325	-1.73527	-1.74895	0.360862	-1.23174	0.0157315	0.0657559	0.289467	-0.850777
c257	control	m	63	12	y	n	n/a	n/a	n/a	0	average	2.5913	0.416098	0.00478847	-2.45462	0.0106401	-1.24126	-0.923712	1.18099	-1.8818	-0.718752	-0.694205	0.103222	-0.240717	0.385636	0.552105	0.157833		0.685392	0.694149	-0.982662
c258	control	m	63	9	n	n	n/a	n/a	n/a	0	average	-1.30354	-0.774773	0.267887	0.63275	-1.7	-1.24126	0.933234	-0.565067	-1.8818	-1.2914	0.805552	0.568022	1.1125	-0.64432	-1.03255	0.348688	0.0678433	0.175778	-0.490072	-0.982662
c259	control	f	29	15	n	n	n/a	n/a	n/a	0	below average	-0.558189	-0.49335	1.00164	0.462905	-0.345708	0.924502	0.588189	-0.100736	1.55681	-0.926102	0.380608	-1.12846	-0.174457	-0.280086	0.25509	-0.334739	0.154079	-0.533358	-0.739138	-0.914606
c260	control	m	66	4	y	y	n/a	n/a	n/a	0	average	0.0874729		-1.28942																	3.13093
c261	control	f	30	9	y	y	n/a	n/a	n/a	0	good	1.0452	-0.858556	0.528461	-4.40811	-0.345708	0.924502	0.588189	-0.747035	-1.71961	-0.926102	1.00554	0.152243	-0.589855	-1.05196	0.324204	-0.268543	0.357466	1.06393	1.77567	-0.914606
c262	control	f	42	8	y	n	n/a	n/a	n/a	0	above average	0.794817	0.0387889	0.392719	0.669824	-1.66045	-1.05258	-2.35196	-1.78433	-1.25656	1.40597	0.856495	1.12731	0.681854	1.07005	0.360862	1.88335	-0.479527	1.07231	-0.255629	-0.0112564
c263	control	f	35	12	n	n	n/a	n/a	n/a	0	good	1.11492	-0.49335	0.0709758	0.578672	-1.99343	0.924502	0.588189	1.19186	-0.409038	0.155864	1.00554	-0.48811	-1.99083	0.0615106	0.324204	-0.498088	-0.21589	-0.167124	-0.162084	-0.238663
c264	control	f	64	4	n	n	n/a	n/a	n/a	0	average	-1.23399	1.01153	0.307224	-0.772532	-0.559572	0.397245	-0.30473	-0.565067	-0.0953613	0.426538	0.805552	1.34269	-0.430405	0.555274	0.552105	0.884559	-0.72506	-2.04616	-0.976028	-0.688835
c265	control	m	30	12	y	y	n/a	n/a	n/a	0	above average	-1.11589	-0.164162	0.76505	-2.69792	1.30202	0.165321	0.588189	-0.100736	-0.409038	-0.385119	1.00554	-0.48811	0.154069	-0.666021	0.324204	-0.105194	-0.0162796	0.573745	-0.104469	0.211965
c266	control	f	20	16	y	y	n/a	n/a	n/a	0	above average	-0.488477	-0.858556	0.15507	-1.02954	1.30202	0.165321	0.588189	0.545562	-1.71961	-0.385119	0.154854	0.65435	-0.283965	1.06111	0.230123	0.636463	-1.3127	-0.274136	0.188778	3.59168
c267	control	m	57	10	n	y	n/a	n/a	n/a	0	below average	-0.155987	1.66915	0.204654	0.479217	-1.07562	-0.744806	-0.973934	-0.873297	-0.339234	0.118382	-0.313222	-1.66486	-0.193781	1.00091	0.400768	0.181583	-0.866232	0.0826653	1.19934	1.80872
c268	control	f	48	16	n	n	n/a	n/a	n/a	0	good	-0.466528	-0.59758	-0.201112	-2.07727	-1.66045	-1.05258	-0.757742	-0.0666977	-1.82697	-0.571322	-1.33889	0.388912	-1.4073	-0.45734	0.248005	-1.52925	-1.26205	0.0657559	0.103266	-0.291097
c269	control	f	54	9	n	n	n/a	n/a	n/a	0	average	0.125136	-0.358922	1.01685	0.479217	0.957776	0.902993	0.756037	1.16857	-0.339234		-0.148658	1.23145	-1.19519	-0.227984	0.400768	-0.00191721	0.980108	1.19165	1.45256	-0.841761
c270	control	f	33	12	y	y	n/a	n/a	n/a	0	good	0.487502	-0.164162	0.0709758	0.578672	-0.345708	-0.593859	0.588189	-0.100736	-0.409038	-2.00807	1.00554	-0.48811	-0.918381	0.789042	0.324204	0.2877	0.078019	1.06393	-0.172163	1.56385
c271	control	f	53	7	n	n	n/a	n/a	n/a	0	average	1.10907	-0.358922	-0.0223301	0.479217	1.46613	0.902993	0.756037	1.16857	-0.339234	-0.497299	-1.36144	0.506963	0.147869	0.647288	0.400768	0.408757	-0.60546	-0.518305	-0.380669	-0.620888
c272	control	f	24	17	n	n	n/a	n/a	n/a	0	good	1.32406	0.201044	0.00257509	0.379265	1.30202	0.165321	-1.68156	0.545562	0.246246	0.155864	-2.18614	0.440898	0.678976	0.219714	0.205156	0.0360894	0.919255	-0.834244	1.51889	-0.914606
c273	control	m	59	7	n	y	n/a	n/a	n/a	1	above average	-1.13992	-0.0821748	-2.02001	0.479217	-1.58397	-0.744806	0.17938			0.118382	0.861423	1.23145	-2.08272	-0.019322	0.400768	0.408757	-2.3192	1.19165	1.19311	0.262606
c274	control	m	58	14	n	n	n/a	n/a	n/a	1	average	-0.0857061	-0.358922	-1.04646	0.379298	-1.58397	-0.744806	0.17938	-0.192676	0.74647	-0.497299	0.570437	0.920555	-0.649314	0.583583	0.358418	0.526744	1.35479	1.19165	1.2699	-0.841761
c275	control	f	57	12	n	n	n/a	n/a	n/a	1	average	-0.647953	0.224852	-0.0879537	0.479217	1.46613	0.902993	0.756037	-0.873297	1.28932	0.118382	0.861423	1.23145	0.693745	-1.20759	-2.6725	-0.229092	0.128208	0.0826653	-0.996036	-0.400014
c276	control	m	57	12	y	y	n/a	n/a	n/a	1	average	-0.577672	0.501599	-0.753848	0.479217	-0.0589238	0.902993	0.756037	1.16857	-0.339234	-0.497299	0.861423	1.23145	0.693745	0.125634	0.400768	0.937419	0.372997	-0.909625	-1.42094	-0.620888
c277	control	f	36	12	n	n	n/a	n/a	n/a	0	average	1.32406	-0.49335	0.0709758	0.578672	0.203534	0.165321	0.588189	0.545562	-0.409038	-2.00807	1.00554	-0.48811	-0.918381	-2.12109	-2.87951	-1.67677	0.676252	-0.167124	0.472872	-0.463977
c278	control	m	39	23	n	n	n/a	n/a	n/a	0	above average	-3.20727	-0.49335	-2.30054	-1.70731	1.30202	0.924502	0.588189	-0.747035	-0.409038		-1.42542	-0.839809	-1.05052	0.264052	0.0553543	-0.815895	3.2203	-0.834244	0.156469	-0.914606
c279	control	m	40	15	n	n	n/a	n/a	n/a	0	good	-0.0682088	1.31153	-0.812664	0.510273	0.432019	0.275943	-0.226336	-1.21179	-0.686138	0.0877765	0.393917	-1.24775	-0.140032	0.32702	-3.57209	-0.449477	2.37232	1.07231	2.27171	-0.291097
c280	control	f	52	12	n	n	n/a	n/a	n/a	0	average	-0.0857061	-0.358922	-0.0879537	0.479217	-0.0589238	0.902993	0.756037	1.16857	-0.339234	0.734062	0.861423	1.23145	-0.421547	0.125634	0.400768	0.159745	-0.368245	-0.957126	-1.29064	-0.620888
c281	control	f	60	12	n	n	n/a	n/a	n/a	0	above average	0.713431	1.01153	1.18194	0.63275	0.0106401	1.2165	0.933234	1.18099	-0.0953613	0.426538	0.805552	0.103222	1.80655	0.385636	0.552105	1.13785	0.277527	1.47723	0.176216	-0.101179
c282	control	m	62	9	y	n	n/a	n/a	n/a	0	below average	-0.468934	0.416098	0.667047	0.63275	1.15106	0.397245	0.933234	1.18099	1.0956	-0.146107	0.805552	1.5163	-0.959281	-0.64432	-4.28359	-0.631324	1.29302	1.47723	1.80088	-0.101179
c283	control	f	50	6	n	n	n/a	n/a	n/a	0	average	1.81188	0.224852	-4.53729	0.479217	-0.0589238	-0.744806	-1.55059	0.487946	-0.339234	0.734062	-1.19688	-0.961565	-0.853541	-1.24821	-2.5288	-2.4966	0.0648959	1.19165	2.3034	-0.179141
c284	control	m	29	16	y	n	n/a	n/a	n/a	0	average	-1.32503	-1.18774	0.15507	0.578672	-0.345708	-1.35304	-1.68156	-0.747035	-0.409038	-0.385119	-1.96039	0.65435	-0.283965	-0.393952	0.230123	-0.542219	0.107245	0.573745	-1.27547	-0.689292
c285	control	f	45	9	n	n	n/a	n/a	n/a	0	good	-0.134595	0.675158	1.23152	-1.67382	1.47825	0.940206	0.836475	1.65094	-0.11572	0.746875	-0.169168	-0.0720325	1.33485	0.963902	0.360862	0.903822	-1.46339	1.07231	-0.0530243	-0.850777
c286	control	m	26	12	y	y	n/a	n/a	n/a	0	good	1.11492	0.530232	-0.623099	0.578672	-0.345708	0.924502	0.588189	1.19186	1.55681	0.155864	1.00554	1.45868	1.20114	0.789042	0.324204	1.46638	0.660776	1.06393	-0.148904	-0.238663
c287	control	f	32	15	n	n	n/a	n/a	n/a	0	average	-1.11589	0.201044	0.307565	0.462905	-0.345708	-2.11222	0.588189	1.19186	-0.409038	-0.385119	0.380608	0.867801	0.897993	-0.280086	0.25509	0.0581548	0.963972	-1.09271	0.101612	0.211965
c288	control	f	54	12	n	n	n/a	n/a	n/a	0	above average	-0.647953	0.808626	0.577941	0.479217	-0.0589238	0.902993	0.756037	1.16857	0.74647	0.734062	0.861423	1.23145	-0.421547	0.792245	0.400768	0.548582	-1.07859	1.19165	-0.69487	-0.620888
c289	control	m	57	12	y	n	n/a	n/a	n/a	0	average	-0.296549	0.808626	0.577941	0.479217	-1.58397	0.902993	0.756037	1.16857	-1.96779	0.118382	0.861423	1.23145	0.693745	-0.540976	0.400768	0.548582				-0.841761
c290	control	m	34	16	y	y	n/a	n/a	n/a	0	average	-0.139913	1.22463	0.849144	0.578672	1.30202	0.924502	0.588189	1.19186	1.55681	0.155864	0.154854	0.65435	0.788484	-0.393952	0.230123	0.243569	-0.709283	-0.575022	0.347848	-0.914606
c291	control	f	35	16	n	n	n/a	n/a	n/a	0	average	0.348077	0.895438	0.15507	0.421085	1.30202	0.924502	0.588189	1.19186	1.55681	0.696847	0.154854	0.65435	0.788484	1.06111	0.230123	1.02936	-0.993032	-0.167124	0.151783	-0.914606
c292	control	f	55	12	n	n	n/a	n/a	n/a	0	average	-0.155987	0.808626	0.577941	0.479217	-0.0589238	0.902993	0.756037	1.16857	-0.339234	0.118382	0.861423	1.23145	0.693745	0.125634	0.400768	0.937419	-1.1198	0.516553	-1.07812	-0.620888
c293	control	m	57	12	y	n	n/a	n/a	n/a	0	average	-0.0154253	-3.27779	-0.753848	-1.46779	0.957776	0.902993	0.17938	0.487946	1.28932	0.734062	0.861423	-0.37215	-0.421547	-1.20759	0.400768	-0.617929	-0.242685	0.750071	0.0520854	-0.400014
c294	control	f	52	9	n	n	n/a	n/a	n/a	1	average	0.462484	0.224852	1.01685	0.479217	0.957776	0.0790934	0.17938	0.487946	0.74647	0.118382	0.861423	0.155318	-0.0798978	1.43467	0.400768	1.55343	-0.294097	-0.518305	0.440661	-0.620888
c295	control	f	36	16	n	n	n/a	n/a	n/a	0	above average	1.32406	0.895438	-3.3153	-3.25023	0.752776	0.924502	-1.68156	1.19186	-0.409038	0.155864	-4.07563	-2.53385	-2.42886	-2.57655	-2.97938	-4.47116	-0.536526	-0.533358	-1.04493	-0.463977
c296	control	m	32	15	y	n	n/a	n/a	n/a	0	average	-0.209625	0.201044	0.307565	0.578672	-1.44419	0.924502	-0.924978	-0.100736	-0.409038	1.77881	0.380608	-1.12846	-0.174457	0.447446	0.25509	0.0581548	-0.326845	-1.79856	-0.17461	1.56385
c297	control	m	40	15	n	y	n/a	n/a	n/a	0	good	-0.134595	-0.2959	0.754836	0.510273	-1.66045	0.940206	0.305069	-0.0666977	0.454698	0.746875	0.393917	0.584864	-0.140032	0.32702	0.277954	0.404748	0.311623			0.268584
c298	control	f	57	9	n	n	n/a	n/a	n/a	0	average	0.125136	-0.942695	-0.314937	0.479217	-1.07562	0.0790934	-0.973934	-0.192676	-0.339234	1.34974	0.861423	-1.48903	-1.19519	-0.227984	-2.60065	-0.779591	2.29378	-0.518305	0.308601	0.704353
c299	control	f	57	9	y	n	n/a	n/a	n/a	0	average	-1.13992	-0.942695	-0.314937	0.479217	-1.07562	0.902993	0.756037	-0.192676	1.28932	-0.497299	0.861423	0.155318	1.03539	0.438627	0.400768	1.16459	2.15072	-1.52735	-0.833857	-0.400014
c300	control	f	59	12	y	n	n/a	n/a	n/a	1	good	-2.12385	-0.942695	1.20993	0.479217	0.957776	0.902993	0.756037	-0.192676	1.28932	-0.497299	-0.642349	-0.37215	-0.421547	0.792245	-2.6725	-0.229092	-0.507076	-1.91086	-0.873161	0.0417324

## Sheet: follow-up 1_late 2020
SubjID	Group	Sex	Age (yr.)	Education (yr.)	Regular smoker	Regular drinker	Severity group	Days since discharge	Odor threshold	Odor discrim.	Taste id.
p014	patient	f	33	12	n	n	nonsevere	273	0.0692256	0.895438	0.577739
p028	patient	m	64	12	n	n	nonsevere	316	-1.16444	-0.179337	0.631871
p033	patient	f	56	15	n	n	severe	289	-0.43711	0.224852	-1.9861
p043	patient	m	41	16	n	n	nonsevere	255	-1.19678	0.0387889
p044	patient	f	48	12	n	n	nonsevere	288	-0.0682088	0.675158	0.668538
p053	patient	f	61	9	n	n	severe	253	-0.468934	-0.179337
p069	patient	f	42	15	n	n	nonsevere	268	2.32171	-2.50669	0.669824
p080	patient	f	56	12	n	n	nonsevere	278	0.40626	0.808626
p085	patient	m	51	16	n	n	nonsevere	267	-1.13992	0.808626	0.479217
p086	patient	f	48	15	n	n	nonsevere	236	-0.798461	-0.59758	0.669824
p088	patient	f	42	16	n	n	nonsevere	272	0.197338	0.675158	-1.83919
p103	patient	f	58	14	n	n	nonsevere	277	1.95244	0.224852	0.479217
p112	patient	f	61	13	n	n	nonsevere	307	1.54804	0.416098	-1.09399
p116	patient	f	51	9	n	n	nonsevere	281	-0.718234	0.224852	0.461645
p118	patient	f	64	12	n	n	nonsevere	239	-0.260281	-0.774773	-1.09778
p122	patient	f	66	14	n	n	nonsevere	251	-0.816688	-0.179337	0.63275
p123	patient	m	50	15	n	n	severe	234	1.10907	0.808626
p124	patient	m	57	12	n	n	nonsevere	284	0.476541	0.808626
p133	patient	f	48	12	n	n	nonsevere	276	-0.931235	0.675158	0.668538
p134	patient	f	66	27	n	n	severe	263	0.365676	0.416098	0.63275
p153	patient	f	62	12	n	n	severe	265	-0.190731	0.416098	-4.55709
p154	patient	f	62	14	n	n	nonsevere	314	1.20029	0.416098	0.63275
p155	patient	m	36	16	n	n	severe	293	0.208651	-3.27093	0.578672
p156	patient	f	36	12	n	n	nonsevere	322	-0.00048718	-1.18774	0.577739
p176	patient	m	26	14	n	n	nonsevere	294	0.836066	0.895438	-1.24987
p181	patient	m	57	12	n	n	nonsevere	265	-0.0857061	0.808626	-2.00241
p185	patient	f	48	16	n	n	nonsevere	232	-0.00182224	1.31153	0.669824
p186	patient	f	50	15	n	n	nonsevere	319	-0.226268	1.97617	-1.9861
p188	patient	f	47	9	n	n	nonsevere	272	0.595657	1.31153	0.6519
p191	patient	f	43	12	n	y	nonsevere	266	1.92339	-0.272174	0.668538
p192	patient	f	48	12	n	n	nonsevere	290	1.12675	-0.59758	0.668538
p193	patient	m	56	8	y	n	nonsevere	267	-0.43711	-0.358922	-1.69468
p194	patient	f	64	12	n	n	nonsevere	265	2.73041	-0.179337	0.631871
p202	patient	m	54	11	y	n	nonsevere	221	-0.929076	-0.358922	0.479217
p216	patient	m	66	15	n	n	severe	314	0.0874729	1.60697	0.63275
p233	patient	f	34	12	n	n	nonsevere	275	1.39377	0.895438	0.577739
p239	patient	m	71	11	n	y	nonsevere	323	1.72173	1.07051	0.534985
p241	patient	m	54	9	n	y	severe	256	0.125136	1.10714
p247	patient	f	57	15	n	n	severe	293	2.51468	1.3924	0.479217
p261	patient	f	55	12	n	n	nonsevere	249	-0.577672	-0.942695	0.477957
p262	patient	f	64	10	n	n	severe	279	0.64388	0.416098	0.624288
p263	patient	f	48	12	n	n	nonsevere	291	-0.0682088	-1.23395	-1.86137
p276	patient	f	58	10	n	n	nonsevere	274	-2.05357	-1.52647	-2.01329
p277	patient	f	58	10	n	n	nonsevere	255	0.125136	0.224852	0.467082
p278	patient	m	56	12	n	n	nonsevere	274	0.476541	0.224852	-2.00241
p303	patient	f	46	9	n	n	nonsevere	282	-0.997621	-1.23395	0.6519
p304	patient	f	65	12	n	n	nonsevere	304	1.68714	-0.179337	-1.09778
p318	patient	f	51	16	n	n	nonsevere	268	2.16328	-0.942695	0.479217
p325	patient	f	51	7	n	n	nonsevere	296	-0.226268	-0.358922	0.45077
p335	patient	f	44	8	n	n	severe	267	1.06036	0.0387889	-1.88355
p340	patient	f	39	15	n	n	nonsevere	294	-0.418764	-1.18774	0.578672
p343	patient	m	24	18	n	n	nonsevere	294	0.557215	-0.49335	-3.06943
p344	patient	f	57	9	n	n	nonsevere	279	1.53075	0.224852	0.461645
p363	patient	f	54	12	n	n	nonsevere	266	-0.577672	0.224852	0.477957
p393	patient	f	46	12	n	n	nonsevere	287	-2.98922	-1.23395	0.668538
p403	patient	f	57	15	n	n	severe	265	-1.42104	0.808626	-1.9861
p404	patient	f	62	12	n	n	nonsevere	255	-0.329832	0.416098	0.631871
p413	patient	m	61	12	n	n	severe	212	1.54804	1.01153	0.631871
p414	patient	f	61	12	n	n	nonsevere	271	1.06119	-0.179337	0.631871
p415	patient	m	61	10	n	y	nonsevere	273	-0.12118	0.720572	-1.10537
p419	patient	f	59	15	n	n	nonsevere	285	-0.929076	0.224852	0.479217
p430	patient	f	61	12	n	n	nonsevere	290	0.435227	1.60697	0.631871
p460	patient	m	44	13	n	y	nonsevere	299	0.92759	-2.18128
p462	patient	m	43	12	n	n	nonsevere	283	-0.200982	0.0387889	-1.86137
p463	patient	f	63	13	n	n	severe	287	0.64388	-0.179337	-1.09399
p465	patient	f	35	15	n	n	nonsevere	278	-0.488477	-0.49335	0.578672

## Sheet: follow-up 2_mid 2021
SubjID	Group	Sex	Age (yr.)	Education (yr.)	Regular smoker	Regular drinker	Severity group	Days since discharge	Odor id.	TG lateralization	MoCA	BDI-SF
p028	patient	m	64	12	n	n	nonsevere	559	0.390441	-1.86404	-0.502613	0.780304
p033	patient	f	56	15	n	n	severe	530	-0.923619	-0.497299	-0.744093	-0.841761
p041	patient	m	54	9	n	n	nonsevere	518	0.0367495	0.734062	0.268995	0.262606
p044	patient	f	48	12	n	n	nonsevere	525	0.461157	-2.54862	-0.636342	1.94762
p053	patient	f	61	9	n	n	severe	497	-1.11794	0.426538	-1.38374	10.1828
p063	patient	f	51	12	n	n	nonsevere	560	-1.44228	1.34974	-0.237549	-0.620888
p080	patient	f	56	12	n	n	nonsevere	524	0.555407	-1.11298	-2.18173	-0.400014
p085	patient	m	51	16	n	n	nonsevere	512	-0.972698	0.118382	0.25357	2.69221
p086	patient	f	48	15	n	n	nonsevere	483	-0.49589	0.0877765	-2.04697	-0.850777
p108	patient	m	51	15	n	y	nonsevere	524	1.07406	-0.497299	-0.355256	-0.620888
p112	patient	f	61	13	n	n	nonsevere	544	1.15934	-1.86404		-0.982662
p116	patient	f	51	9	n	n	nonsevere	520	-0.629145	1.34974	-0.508679	2.69221
p119	patient	f	64	14	n	n	nonsevere	528	0.730762	-1.2914	0.847034	-0.982662
p120	patient	m	63	15	n	n	nonsevere	528	-0.496138	-0.146107	-0.601502	0.192648
p122	patient	f	66	14	n	n	nonsevere	491	0.730762	-1.2914	1.50038	0.192648
p123	patient	m	50	15	n	n	severe	475	-1.58951	1.34974	0.0335808	-0.400014
p124	patient	m	57	12	n	n	nonsevere	528	0.555407	-0.497299	0.151288	-0.400014
p125	patient	m	67	15	n	n	severe	531	1.1005	-0.146107	-0.601502	-0.101179
p126	patient	f	66	12	n	n	nonsevere	521	0.789601	-1.86404	0.804069	0.192648
p128	patient	f	52	12	n	n	nonsevere	489	-0.110487	1.34974	0.928962	0.262606
p134	patient	f	66	27	n	n	severe	506	-2.44581	-0.146107	-0.997055	-0.395007
p135	patient	f	67	12	n	n	severe	516	-4.00032	0.426538	-1.48263	-0.982662
p145	patient	m	67	9	n	n	nonsevere	544	-0.31962	-0.146107	-2.03708	-0.982662
p146	patient	f	66	12	n	n	nonsevere	542	1.18194	-0.146107	-0.175943	-0.982662
p153	patient	f	62	12	n	n	severe	508	-4.79864	-2.43669	-1.48263	4.89389
p159	patient	f	57	12	n	n	nonsevere	498	0.555407	-0.497299	-1.40406	-0.400014
p181	patient	m	57	12	n	n	nonsevere	503	-4.10585	0.734062	0.151288	3.79658
p185	patient	f	48	16	n	n	nonsevere	476	1.01385	0.0877765	-0.523992	-0.0112564
p186	patient	f	50	15	n	n	nonsevere	560	-0.257725	-0.497299	0.811255	0.262606
p192	patient	f	48	12	n	n	nonsevere	537	1.23152	-0.571322	-1.49057	-0.570937
p193	patient	m	56	8	y	n	nonsevere	514	-0.580066	0.734062	1.21552	-0.620888
p194	patient	f	64	12	n	n	nonsevere	505	1.18194	-0.718752	1.13074	-0.395007
p200	patient	f	58	12	n	n	nonsevere	530	-0.776382	0.734062	-2.18173	-0.841761
p202	patient	m	54	11	y	n	nonsevere	468	-1.3932	-1.11298	-0.457538	-0.620888
p216	patient	m	66	15	n	n	severe	555	0.701342	0.426538	0.37851	0.192648
p217	patient	m	57	15	n	y	nonsevere	514	0.40817	0.118382	-1.13293	-0.620888
p218	patient	f	59	15	n	n	nonsevere	557	1.07406	1.34974	-0.355256	-0.620888
p219	patient	f	50	16	n	n	severe	516	-6.29985	0.734062	0.642407	-0.620888
p239	patient	m	71	11	n	y	nonsevere	564	1.01603	0.70762	0.875081	1.57221
p241	patient	m	54	9	n	y	severe	499	-1.29504	-0.497299	-0.508679	-0.841761
p247	patient	f	57	15	n	n	severe	535	1.07406	-1.11298	0.422418	-0.620888
p259	patient	m	63	7	n	y	nonsevere	530	0.537539	1.57183	1.51333	-0.688835
p260	patient	f	60	6	n	n	nonsevere	516	-3.42464	-0.718752	0.348505	4.89389
p261	patient	f	55	12	n	n	nonsevere	501	-4.77175	1.96542	1.70664	-0.620888
p269	patient	m	66	6	n	y	severe	564	-0.231361	-0.718752		4.01241
p270	patient	f	50	15	n	n	nonsevere	525	1.07406	0.734062	-0.355256	-0.620888
p276	patient	f	58	10	n	n	nonsevere	521	1.20993	0.734062	1.26666	2.69221
p277	patient	f	58	10	n	n	nonsevere	511	-0.0123295	1.34974	-1.4552	3.13396
p278	patient	m	56	12	n	n	nonsevere	512	-0.776382	0.734062	-1.7929	0.262606
p289	patient	f	74	12	n	y	nonsevere	525	0.573689	0.70762	1.44002	1.57221
p304	patient	f	65	12	n	n	nonsevere	546	0.789601	0.999183	-0.502613	-0.982662
p317	patient	f	66	12	n	n	nonsevere	438	0.789601	-1.2914	1.13074	1.07413
p318	patient	f	51	16	n	n	nonsevere	510	0.359091	1.34974	-0.912941	2.91309
p363	patient	f	54	12	n	n	nonsevere	508	0.555407	-0.497299	0.540125	0.262606
p393	patient	f	46	12	n	n	nonsevere	526	-8.1601	0.746875	0.217883	2.22747
p400	patient	f	65	12	n	n	severe	522	1.18194	-0.718752	-1.15595	1.07413
p403	patient	f	57	15	n	n	severe	505	-0.923619	-1.72866	-1.9106	0.483479
p404	patient	f	62	12	n	n	nonsevere	505	1.18194	-2.43669	0.804069	0.192648
p413	patient	m	61	12	n	n	severe	455	0.390441	-0.718752	0.804069	-0.395007
p414	patient	f	61	12	n	n	nonsevere	514	0.789601	1.57183	-0.829284	1.95561
p415	patient	m	61	10	n	y	nonsevere	510	0.0501202	0.426538	0.107763	-0.982662
p419	patient	f	59	15	n	n	nonsevere	533	1.07406	-0.497299	0.0335808	2.69221
p421	patient	f	53	11	n	n	nonsevere	519	1.20993	-1.11298	1.09781	0.704353
p430	patient	f	61	12	n	n	nonsevere	527	0.789601	-1.2914	-0.175943	-0.395007
p447	patient	m	64	16	n	n	nonsevere	535	-2.1222	-1.2914	-1.07003	0.780304
p448	patient	f	50	9	n	n	nonsevere	530	-3.95862		-1.67519	2.69221
p463	patient	f	63	13	n	n	severe	522	-0.0381387	1.57183	-1.29781	-0.101179
p468	patient	f	57	12	n	n	nonsevere	523	-0.110487	-1.11298	-0.626386	2.02959
x001	patient	m	51	15	n	n	severe	530	1.07406	-0.497299	1.20009	-0.179141
x002	patient	f	58	9	n	n	nonsevere	526	-1.29504	-0.497299	-1.67519	0.925226
x003	patient	m	63	12	n	y	nonsevere	521	-3.202	0.426538	-0.175943	2.8371
x004	patient	f	64	14	n	n	nonsevere	365	1.12992	-1.2914	1.50038	1.07413
x005	patient	f	60	14	n	n	nonsevere	509	-0.0675583	-0.146107	-1.11299	-0.101179
x006	patient	m	50	12	n	n	nonsevere	533	1.20993	-0.497299		1.80872
x007	patient	f	62	14	n	n	nonsevere	524	0.730762	-0.146107	-0.132978	3.42475
x008	patient	f	53	12	n	n	nonsevere	522	1.20993	0.734062	0.540125	-0.400014
x009	patient	f	74	6	n	n	nonsevere	519	-0.0680787	0.111823		0.264367
x010	patient	f	53	12	n	n	severe	548	0.555407	-1.72866	-1.01522	0.0417324
x011	patient	m	57	13	n	y	nonsevere	506	-2.15725	1.34974	-1.18407	0.0417324
x012	patient	m	66	9	n	n	nonsevere	527	0.4787	-1.2914	-2.69042	0.780304
x013	patient	f	58	11	n	n	severe	506	-0.727303	0.118382	-0.0687012	0.262606
x014	patient	f	53	12	n	n	nonsevere	515	0.555407	0.118382	-0.237549	0.704353
x015	patient	m	51	11	y	n	nonsevere	521	-2.05909	-1.11298	-1.23521	1.1461
x016	patient	m	50	12	n	y	nonsevere	531	1.20993	2.5811	0.540125	1.36697
x017	patient	f	64	0	n	n	nonsevere	533	1.14264	-0.718752	0.546281	-0.101179
x018	patient	f	60	11	n	n	severe	578	0.819021	-1.86404	-1.34077	5.48155
x019	patient	m	57	15	n	n	severe	512	-0.923619	0.734062	-1.52177	-0.620888
x020	patient	m	64	12	y	y	nonsevere	516	-0.407879	0.426538	-1.8093	-0.395007
x021	patient	f	58	9	n	n	nonsevere	528	-4.62451	-0.497299	-2.06403	2.02959
x022	patient	f	59	12	n	n	severe	547	1.20993	1.34974	-2.18173	0.0417324
x023	patient	m	59	11	y	y	nonsevere	520	-0.0614085	0.734062	-0.846375	0.0417324
x024	patient	m	60	12	n	y	nonsevere	530	0.789601	-0.146107	1.13074	-0.982662
x025	patient	f	63	11	n	n	nonsevere	537	0.819021	-1.2914	-0.36076	0.192648
x026	patient	f	60	12	n	n	nonsevere	532	1.18194	-1.86404	-0.175943	-0.688835
x027	patient	f	59	12	n	n	nonsevere	565	1.20993	-0.497299	-1.01522	-0.400014
x028	patient	f	58	12	n	n	nonsevere	507	0.555407	0.118382	0.540125	-0.841761
x029	patient	m	55	9	n	n	nonsevere	531	0.702644	0.734062	-0.508679	-0.620888
x030	patient	m	52	9	n	n	nonsevere	534	1.20993	0.734062	-1.28635	-0.841761
x031	patient	f	65	0	n	n	nonsevere	535	-0.454004	1.57183	-0.433731	1.95561
x032	patient	f	56	10	n	n	nonsevere	535	1.20993	-0.497299	0.100147	-0.620888
x033	patient	f	58	9	n	n	nonsevere	524	1.20993	-1.72866	-0.897516	0.704353
x034	patient	f	59	9	n	n	nonsevere	519	-2.62683	-0.497299	-2.06403	0.925226
x035	patient	m	76	9	n	n	nonsevere	525	-4.27894	0.70762		4.8418
x036	patient	f	53	8	n	n	nonsevere	532	-1.24596	0.118382	-2.67285	1.80872
x037	patient	f	53	8	n	n	nonsevere	513	0.751723	0.734062	-1.50634	-0.179141
x038	patient	f	53	12	y	n	nonsevere	513	-0.776382	-1.72866	-0.626386	4.23833
x039	patient	m	75	16	n	n	nonsevere	534	-0.783698	-1.67556	-2.07317	-0.389552
x040	patient	f	72	12	n	n	nonsevere	522	0.573689	0.70762	-1.08565	1.57221
x041	patient	f	66	12	n	n	nonsevere	541	0.390441	2.14447	-1.8093	1.07413
x042	patient	f	51	6	n	n	nonsevere	546	1.20993	-1.72866	-1.55748	-0.841761
x043	patient	m	65	9	y	n	nonsevere	529	0.0795399	-0.146107	0.576287	-0.688835
x044	patient	f	71	9	n	n	nonsevere	521	0.252805	1.89921	0.106006	-0.716512
x045	patient	f	57	9	n	n	nonsevere	527	-1.96093	-0.497299	-0.508679	0.925226
x046	patient	m	49	9	n	n	nonsevere	535	-1.7168	1.40597	-1.78839	-0.850777
x047	patient	f	57	9	n	n	nonsevere	508	0.0367495	1.34974	-1.67519	-0.841761
x048	patient	f	46	12	n	n	nonsevere	540	0.461157	0.0877765	0.644995	1.38794
x049	patient	f	66	12	n	n	nonsevere	514	0.390441	0.426538	-0.829284	2.24944
x050	patient	f	51	11	n	n	nonsevere	543	-0.0614085	-0.497299	-1.23521	-0.179141
x051	patient	f	56	12	n	n	nonsevere	542	1.20993	1.34974		2.69221
x052	patient	m	73	15	n	n	nonsevere	540	0.482596	-0.483973	-0.834059	2.55309
x053	patient	m	73	18	n	n	nonsevere	561	1.21546	-1.07977	-2.74733	-0.0625924

## Sheet: notes
No. underlying cond.	number of underlying conditions
Subj. smell function	subjective evaluation of one's sense of smell
TG lateralization	trigeminal lateralization
Go/no-go RT	standardized mean reaction time for the go trials in the go/no-go task
discrim.	discrimination
id.	identification
int.	intensity
